# Supplementary material for: Genetic diversity and phylogenetic characteristics of Chinese Tibetan and Yi minority ethnic groups revealed by non-CODIS STR markers
Source: PubMed Central journal article supplement (PMC5897523; doi:10.1038/s41598-018-24291-5), 2018-04-12
Supplement: 41598_2018_24291_MOESM1_ESM.pdf [file 41598_2018_24291_MOESM1_ESM.pdf]

## **Supplementary Figures S1-S4 and Supplementary Tables S1-S9**

### **Genetic diversity and phylogenetic characteristics of Chinese Tibetan and Yi minority ethnic groups revealed by non-CODIS STR markers**

**Guanglin He<sup>1+</sup>, Zheng Wang<sup>1+</sup>, Xing Zou<sup>2</sup>, Xu Chen<sup>3</sup>, Jing Liu<sup>1</sup>, Mengge Wang<sup>1</sup>, Yiping Hou<sup>1\*</sup>**

<sup>1</sup>Institute of Forensic Medicine, West China School of Basic Medical Sciences & Forensic Medicine, Sichuan University, Chengdu, Sichuan, China

<sup>2</sup>Department of Forensic Medicine, College of Basic Medicine, Chongqing Medical University, Chongqing, China

<sup>3</sup>Department of Clinical Laboratory, the First People's Hospital of Liangshan Yi Autonomous Prefecture, Xichang, Sichuan, China

+ These authors contributed equally to this work.

\* Corresponding author: Yiping Hou

Institute of Forensic Medicine, West China School of Basic Medical Sciences & Forensic Medicine, Sichuan University, Chengdu 610041, China

E-mail: profhou@yahoo.com; Phone: +86-28-85501550; Fax: +86-28-85501549.

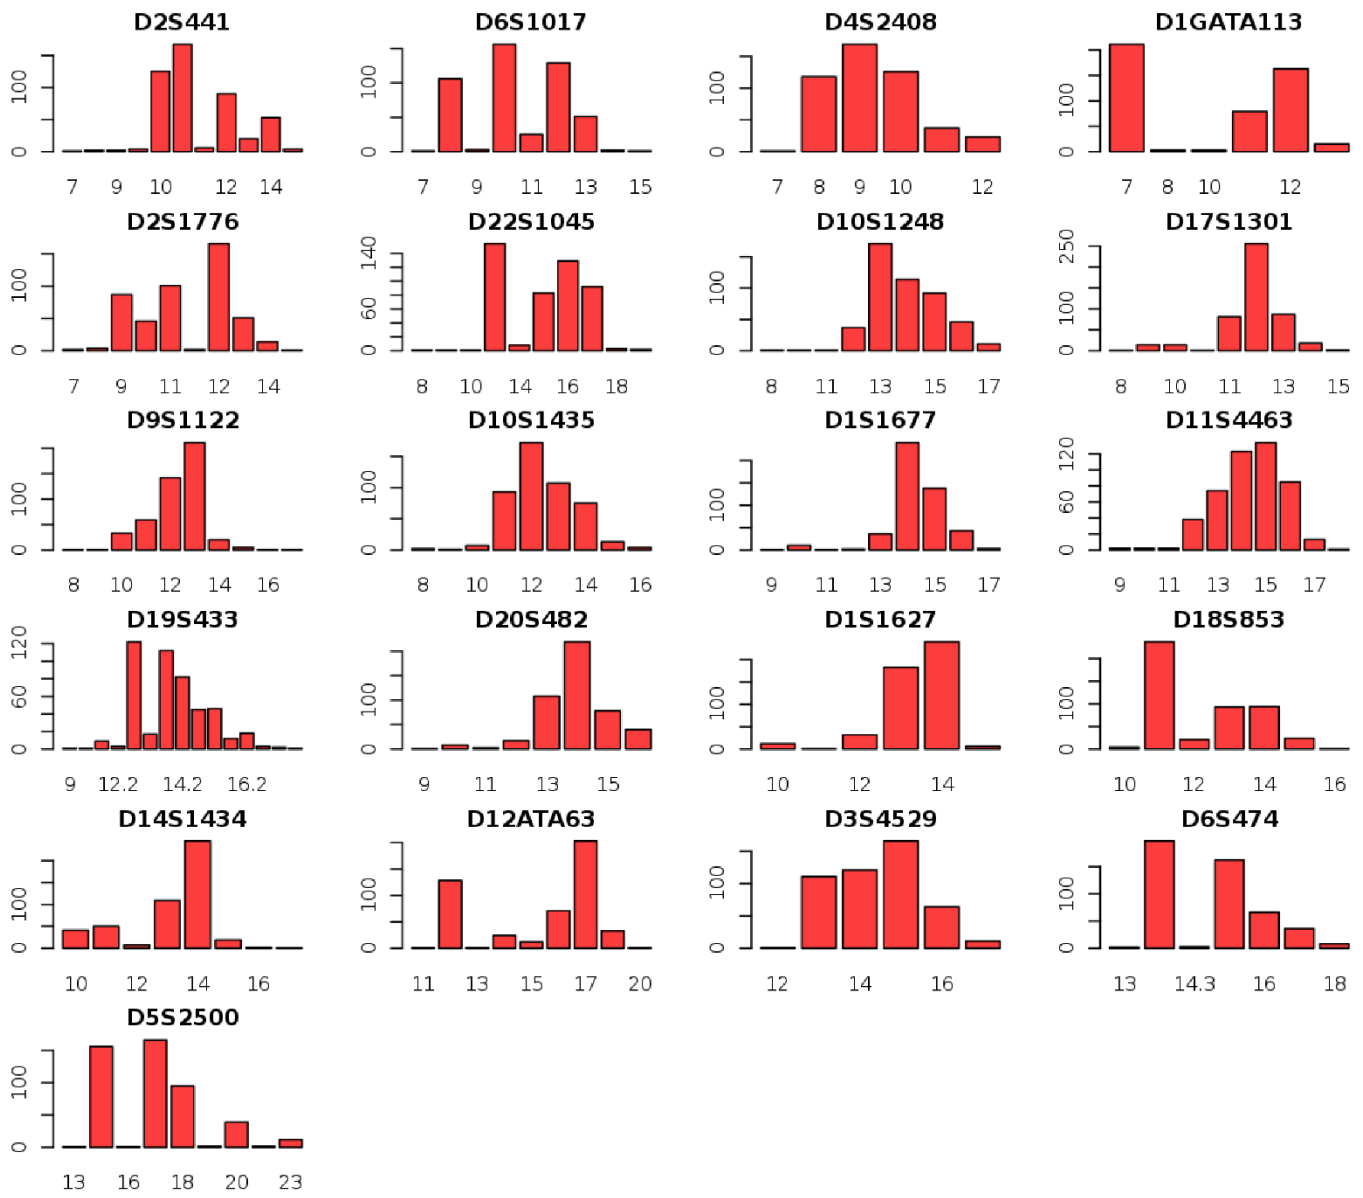

Supplementary Figure S1. Plots allele frequency distributions of 21 non-CODIS STRs in the Sichuan Tibetan population.

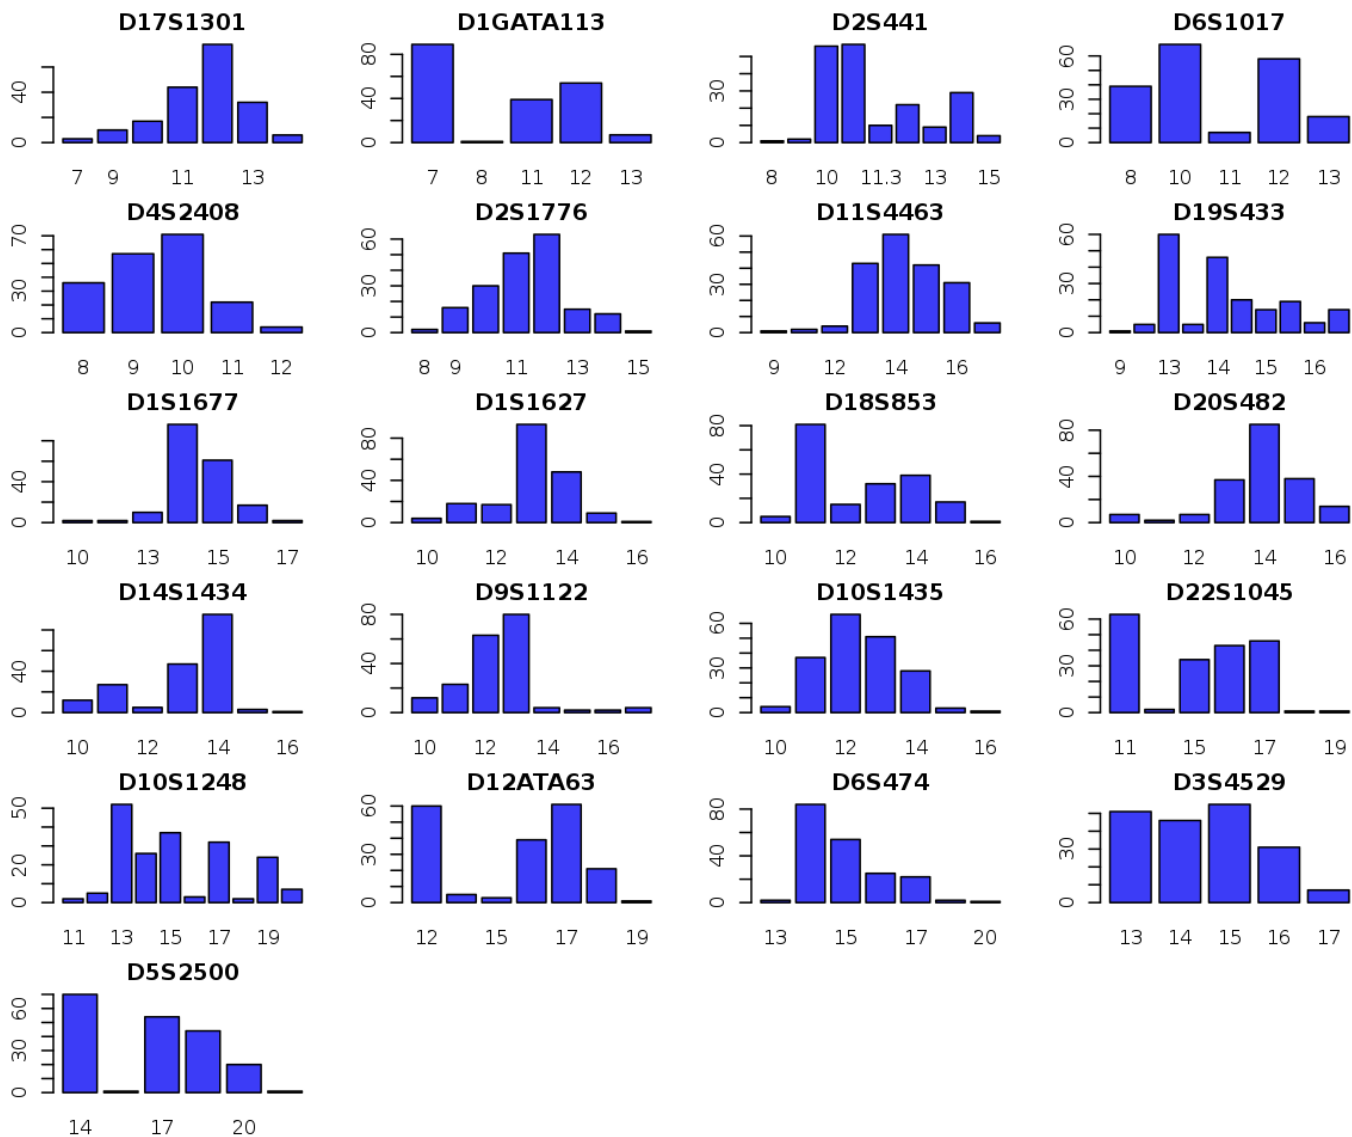

Supplementary Figure S1. Plots allele frequency distributions of 21 non-CODIS STRs in the Sichuan Yi population.

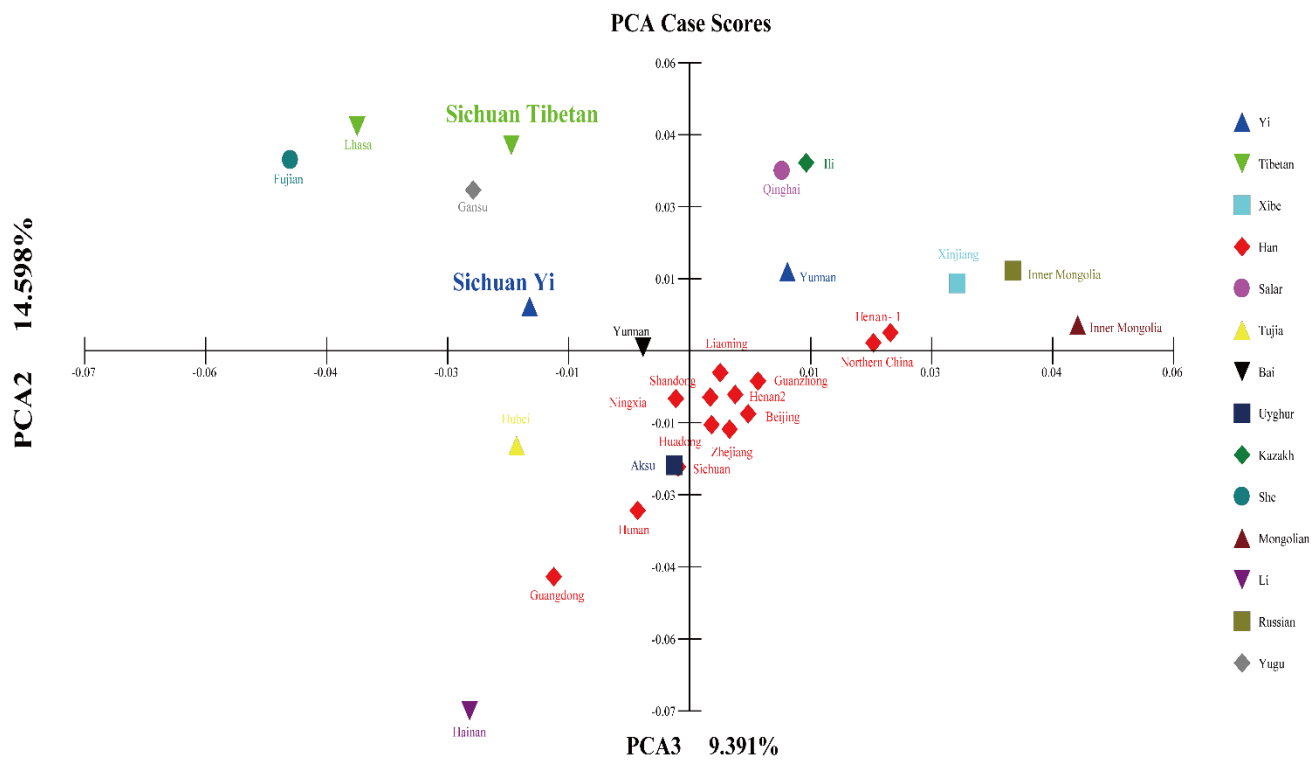

**Supplementary Figure S3. The principle component analysis showed the genetic relationship of Sichuan Tibetan, Sichuan Yi and 26 Chinese populations based on the second and third components.**

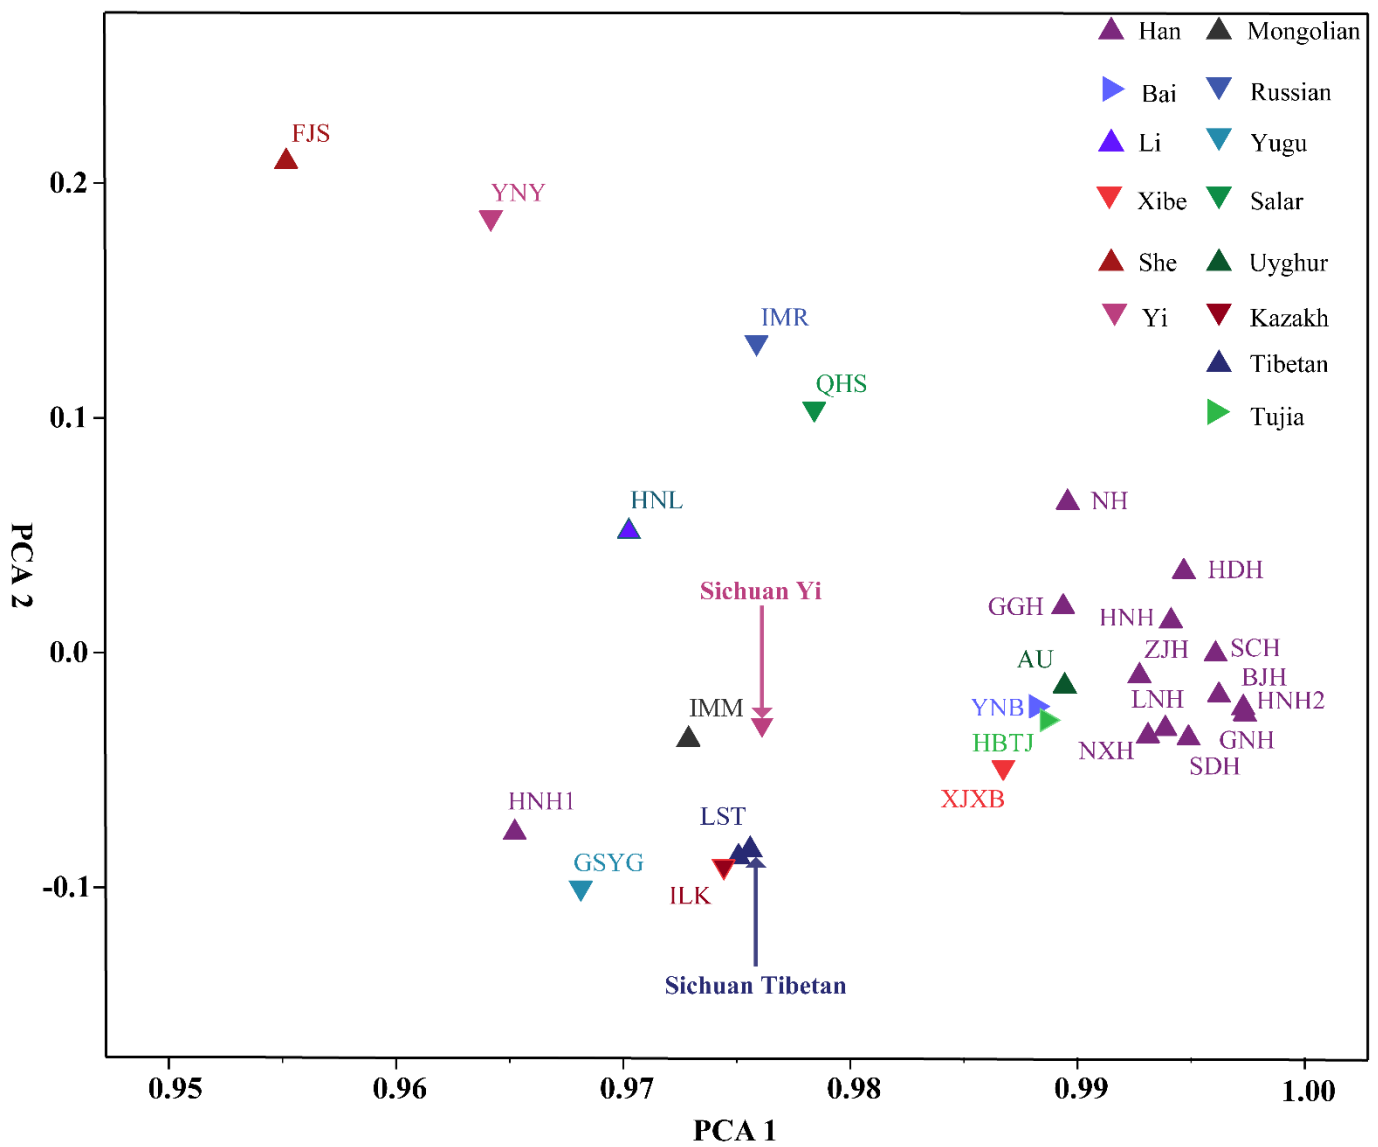

**Supplementary Figure S4. The principal component analysis (PCA) of population structure among 28 Chinese populations was constructed by the SPSS.** The results displayed population relationships between the Sichuan Tibetan, Sichuan Yi populations and other 26 reference populations based on the variances of the first, second components. Each population is represented by one triangle and the color label corresponding to ethnicity (LST: Lhasa-Tibetan; QHS: Qinghai-Salar; HBTJ: Hubei-Tujia; YNB: Yunnan-Bai; NXH: Ningxia-Han; AU: Kuqa-Uyghur; ILK: Ili-Kazakh; FJS: Fujian-She; IMM: Inner-Mongolia-Mongolian; NH: Northern-Han; GNH: Guanzhong-Han; YNY: Yunnan-Yi; HNL: Hainan-Li; GGH: Guangdong-Han; HNH: Hunan-Han; HDH: Huadong-Han; BJH: Beijing-Han; ZJH: Zhejiang-Han; IMR: Inner-Mongolia-Russian; SDH: Shandong-Han; LNH: Liaoning-Han; HNH2: Henan-Han-2; GSYG: Gansu-Yugu; XJXB: Xinjiang-Xibe; HNH1: Henan-Han-1; SCH: Sichuan-Han).

**Supplementary Table S1.** The genotype of 237 Tibetan individuals residing in the Chengdu city in Sichuan Province, Southwest China

| Num<br>ber | Amelo<br>genin | D6S<br>474 | D12A<br>TA63 | D22S<br>1045 | D10S<br>1248 | D1S1<br>677 | D11S<br>4463 | D1S1<br>627 | D3S4<br>529 | D2S<br>441 | D6S1<br>017 | D4S2<br>408 | D19S<br>433 | D17S<br>1301 | D1GAT<br>A113 | D18S<br>853 | D20S<br>482 | D14S<br>1434 | D9S1<br>122 | D2S1<br>776 | D10S<br>1435 | D5S2<br>500 |
|------------|----------------|------------|--------------|--------------|--------------|-------------|--------------|-------------|-------------|------------|-------------|-------------|-------------|--------------|---------------|-------------|-------------|--------------|-------------|-------------|--------------|-------------|
| N00<br>1   | X              | 16         | 14           | 16           | 12           | 13          | 15           | 13          | 14          | 12         | 8           | 10          | 13          | 12           | 7             | 11          | 13          | 13           | 11          | 12          | 13           | 17          |
| N00<br>2   | X              | 17         | 17           | 17           | 14           | 14          | 16           | 13          | 16          | 14         | 10          | 10          | 13          | 13           | 12            | 14          | 15          | 14           | 11          | 12          | 14           | 18          |
| N00<br>3   | X              | 14         | 12           | 16           | 15           | 14          | 13           | 12          | 15          | 11         | 8           | 8           | 13          | 9            | 11            | 11          | 14          | 13           | 13          | 10          | 12           | 14          |
| N00<br>4   | X              | 16         | 12           | 17           | 17           | 16          | 15           | 13          | 15          | 12         | 10          | 9           | 15.2        | 12           | 12            | 11          | 15          | 13           | 14          | 12          | 14           | 17          |
| N00<br>5   | X              | 14         | 14           | 15           | 14           | 15          | 14           | 14          | 15          | 10         | 8           | 9           | 14          | 12           | 7             | 11          | 11          | 13           | 10          | 10          | 13           | 14          |
| N00<br>6   | X              | 14         | 17           | 15           | 15           | 15          | 16           | 14          | 17          | 12         | 12          | 10          | 14          | 12           | 12            | 11          | 14          | 14           | 10          | 11          | 13           | 17          |
| N00<br>7   | X              | 14         | 15           | 11           | 13           | 15          | 14           | 14          | 14          | 10         | 8           | 8           | 15.2        | 11           | 7             | 11          | 13          | 14           | 10          | 9           | 13           | 20          |
| N00<br>8   | X              | 15         | 17           | 16           | 16           | 16          | 14           | 14          | 16          | 14         | 13          | 10          | 15.2        | 12           | 7             | 14          | 14          | 14           | 13          | 12          | 14           | 23          |
| N00<br>9   | X              | 14         | 12           | 11           | 12           | 14          | 15           | 13          | 13          | 10         | 8           | 8           | 13.2        | 12           | 7             | 11          | 14          | 13           | 11          | 12          | 12           | 14          |
| N00<br>0   | X              | 14         | 16           | 11           | 14           | 15          | 16           | 13          | 15          | 14         | 12          | 10          | 14.2        | 13           | 7             | 11          | 14          | 13           | 11          | 14          | 13           | 17          |
| N00<br>1   | X              | 14         | 17           | 11           | 15           | 15          | 13           | 14          | 15          | 12         | 10          | 8           | 14.2        | 11           | 12            | 11          | 13          | 14           | 10          | 10          | 8            | 14          |
| N00<br>2   | X              | 14         | 17           | 11           | 17           | 15          | 14           | 15          | 16          | 14         | 12          | 9           | 15          | 12           | 12            | 13          | 14          | 15           | 13          | 12          | 12           | 18          |
| N00<br>3   | X              | 14         | 12           | 17           | 14           | 16          | 17           | 13          | 15          | 11         | 9           | 9           | 15.2        | 11           | 7             | 12          | 14          | 15           | 12          | 12          | 14           | 16          |
| N00<br>4   | X              | 14         | 15           | 18           | 14           | 16          | 18           | 13          | 15          | 12         | 11          | 10          | 18          | 13           | 12            | 12          | 15          | 16           | 13          | 14          | 15           | 21          |
| N00<br>5   | X              | 14         | 17           | 16           | 14           | 14          | 13           | 12          | 14          | 10         | 10          | 9           | 12.2        | 12           | 7             | 11          | 14          | 14           | 12          | 9           | 13           | 14          |
| N00<br>6   | X              | 15         | 18           | 17           | 15           | 14          | 16           | 14          | 16          | 14         | 12          | 10          | 13          | 12           | 12            | 14          | 14          | 14           | 13          | 12          | 14           | 14          |
| N00<br>7   | X              | 15         | 17           | 11           | 14           | 14          | 15           | 13          | 13          | 11         | 10          | 8           | 13          | 12           | 7             | 11          | 12          | 11           | 10          | 9           | 11           | 14          |
| N00<br>8   | X              | 16         | 17           | 16           | 14           | 14          | 16           | 13          | 14          | 12         | 13          | 10          | 13          | 12           | 7             | 11          | 14          | 14           | 13          | 13          | 12           | 17          |
| N01<br>0   | X              | 15         | 12           | 11           | 12           | 14          | 12           | 12          | 13          | 11         | 12          | 9           | 12          | 12           | 7             | 14          | 13          | 10           | 11          | 9           | 12           | 14          |
| N01<br>1   | X              | 15         | 17           | 16           | 13           | 15          | 15           | 13          | 14          | 15         | 12          | 9           | 16.2        | 12           | 11            | 14          | 14          | 13           | 11          | 12          | 14           | 14          |
| N01<br>2   | X              | 15         | 14           | 16           | 13           | 14          | 15           | 13          | 15          | 11         | 12          | 9           | 13          | 12           | 7             | 11          | 15          | 13           | 11          | 12          | 11           | 14          |
| N01<br>3   | X              | 15         | 17           | 17           | 15           | 14          | 15           | 13          | 16          | 12         | 13          | 10          | 17.2        | 12           | 12            | 13          | 15          | 14           | 13          | 13          | 12           | 20          |
| N01<br>4   | X              | 14         | 14           | 16           | 13           | 14          | 13           | 13          | 13          | 11         | 12          | 9           | 13          | 12           | 7             | 13          | 14          | 14           | 11          | 12          | 12           | 17          |
| N01<br>5   | X              | 15         | 17           | 17           | 15           | 14          | 15           | 13          | 15          | 12         | 12          | 10          | 14          | 12           | 12            | 14          | 15          | 14           | 13          | 12          | 12           | 17          |
| N01<br>6   | X              | 14         | 17           | 14           | 13           | 15          | 12           | 14          | 14          | 11         | 10          | 9           | 12          | 12           | 7             | 11          | 14          | 13           | 10          | 9           | 11           | 14          |
| N01<br>7   | X              | 15         | 18           | 15           | 13           | 17          | 15           | 14          | 14          | 11         | 13          | 11          | 13          | 12           | 12            | 13          | 14          | 14           | 11          | 12          | 11           | 14          |
| N01<br>8   | X              | 15         | 17           | 15           | 13           | 15          | 15           | 13          | 15          | 11         | 8           | 8           | 13          | 11           | 7             | 11          | 13          | 10           | 13          | 9           | 11           | 20          |
| N01<br>9   | X              | 15         | 17           | 17           | 13           | 15          | 16           | 14          | 15          | 13         | 10          | 10          | 14.2        | 12           | 7             | 11          | 14          | 13           | 13          | 12          | 12           | 23          |

|     |   |    |    |    |    |    |    |    |    |    |    |    |      |    |    |    |    |    |    |    |    |    |
|-----|---|----|----|----|----|----|----|----|----|----|----|----|------|----|----|----|----|----|----|----|----|----|
| N01 | X | 15 | 17 | 16 | 13 | 14 | 12 | 13 | 13 | 10 | 8  | 10 | 14   | 12 | 11 | 11 | 13 | 13 | 12 | 12 | 13 | 17 |
| 5   | X | 17 | 17 | 17 | 13 | 15 | 12 | 14 | 14 | 12 | 8  | 12 | 14.2 | 14 | 12 | 14 | 14 | 14 | 13 | 12 | 14 | 20 |
| N01 | X | 14 | 12 | 11 | 13 | 15 | 13 | 14 | 15 | 10 | 8  | 8  | 14.2 | 11 | 7  | 11 | 13 | 13 | 12 | 9  | 11 | 17 |
| 6   | X | 15 | 17 | 15 | 15 | 16 | 15 | 14 | 15 | 11 | 12 | 9  | 14.2 | 12 | 12 | 13 | 15 | 14 | 13 | 14 | 13 | 20 |
| N01 | X | 14 | 17 | 15 | 12 | 14 | 16 | 14 | 16 | 10 | 8  | 8  | 13   | 12 | 7  | 11 | 13 | 13 | 12 | 12 | 11 | 20 |
| 7   | X | 14 | 17 | 16 | 14 | 15 | 16 | 14 | 16 | 11 | 12 | 10 | 13   | 12 | 7  | 13 | 13 | 14 | 13 | 13 | 14 | 23 |
| N01 | X | 14 | 16 | 16 | 15 | 13 | 13 | 14 | 13 | 12 | 10 | 8  | 13   | 12 | 7  | 11 | 14 | 10 | 11 | 12 | 11 | 14 |
| 8   | X | 15 | 17 | 17 | 16 | 15 | 15 | 14 | 14 | 13 | 10 | 8  | 14.2 | 12 | 13 | 14 | 15 | 13 | 12 | 12 | 12 | 14 |
| N01 | X | 14 | 15 | 11 | 13 | 14 | 14 | 14 | 15 | 10 | 11 | 8  | 14.2 | 11 | 7  | 14 | 13 | 13 | 12 | 12 | 13 | 14 |
| 9   | X | 14 | 18 | 11 | 17 | 15 | 16 | 14 | 15 | 12 | 12 | 10 | 14.2 | 12 | 7  | 14 | 14 | 13 | 13 | 12 | 14 | 18 |
| N02 | X | 15 | 12 | 11 | 13 | 15 | 12 | 14 | 13 | 10 | 11 | 9  | 14   | 13 | 12 | 11 | 13 | 14 | 12 | 9  | 11 | 14 |
| 0   | X | 16 | 14 | 11 | 14 | 16 | 17 | 14 | 15 | 12 | 13 | 10 | 14.2 | 13 | 12 | 12 | 16 | 14 | 12 | 12 | 12 | 18 |
| N02 | X | 14 | 17 | 11 | 12 | 10 | 14 | 13 | 13 | 10 | 10 | 10 | 14   | 12 | 7  | 11 | 15 | 12 | 11 | 9  | 12 | 17 |
| 1   | X | 16 | 17 | 15 | 16 | 14 | 15 | 14 | 13 | 11 | 12 | 12 | 15   | 13 | 7  | 11 | 15 | 14 | 12 | 9  | 12 | 20 |
| N02 | X | 14 | 17 | 15 | 13 | 14 | 12 | 14 | 15 | 10 | 13 | 9  | 14   | 12 | 7  | 13 | 13 | 14 | 12 | 10 | 12 | 14 |
| 2   | X | 15 | 18 | 16 | 16 | 16 | 13 | 14 | 15 | 14 | 13 | 10 | 14.2 | 12 | 12 | 15 | 14 | 14 | 13 | 12 | 12 | 17 |
| N02 | X | 16 | 17 | 11 | 12 | 14 | 15 | 14 | 13 | 10 | 10 | 8  | 14   | 12 | 7  | 11 | 13 | 11 | 12 | 12 | 13 | 17 |
| 3   | X | 17 | 17 | 11 | 16 | 14 | 15 | 14 | 15 | 11 | 13 | 9  | 14.2 | 12 | 11 | 15 | 14 | 14 | 13 | 13 | 14 | 23 |
| N02 | X | 14 | 17 | 16 | 13 | 15 | 12 | 14 | 13 | 12 | 8  | 9  | 13   | 11 | 11 | 13 | 13 | 14 | 12 | 9  | 12 | 14 |
| 4   | X | 15 | 17 | 17 | 15 | 16 | 15 | 14 | 15 | 14 | 13 | 10 | 14.2 | 12 | 12 | 13 | 14 | 14 | 13 | 10 | 12 | 14 |
| N02 | X | 15 | 17 | 11 | 13 | 15 | 14 | 14 | 15 | 10 | 12 | 8  | 15   | 12 | 7  | 11 | 14 | 14 | 12 | 9  | 13 | 14 |
| 5   | X | 16 | 17 | 16 | 14 | 16 | 14 | 14 | 15 | 12 | 12 | 10 | 15.2 | 14 | 7  | 14 | 15 | 14 | 13 | 12 | 14 | 20 |
| N02 | X | 14 | 16 | 16 | 13 | 15 | 12 | 14 | 15 | 11 | 8  | 8  | 13   | 10 | 7  | 13 | 13 | 13 | 11 | 11 | 11 | 14 |
| 6   | X | 17 | 17 | 17 | 14 | 16 | 16 | 14 | 15 | 12 | 12 | 9  | 15   | 12 | 11 | 13 | 14 | 14 | 13 | 15 | 13 | 23 |
| N02 | X | 14 | 12 | 11 | 15 | 15 | 13 | 14 | 15 | 10 | 8  | 9  | 14   | 12 | 7  | 11 | 13 | 14 | 12 | 10 | 13 | 17 |
| 7   | X | 15 | 12 | 11 | 16 | 16 | 14 | 14 | 16 | 11 | 12 | 12 | 15   | 12 | 12 | 13 | 14 | 14 | 12 | 11 | 16 | 17 |
| N02 | X | 15 | 18 | 16 | 14 | 14 | 14 | 14 | 13 | 10 | 8  | 9  | 13   | 11 | 7  | 11 | 14 | 11 | 12 | 11 | 11 | 20 |
| 8   | X | 17 | 18 | 17 | 14 | 15 | 15 | 14 | 16 | 11 | 10 | 10 | 16   | 12 | 7  | 14 | 16 | 14 | 14 | 14 | 13 | 20 |
| N02 | X | 14 | 17 | 15 | 13 | 14 | 15 | 13 | 13 | 11 | 8  | 8  | 13   | 12 | 7  | 11 | 14 | 13 | 10 | 10 | 11 | 17 |
| 9   | X | 14 | 17 | 17 | 15 | 14 | 16 | 14 | 15 | 12 | 12 | 9  | 14   | 12 | 12 | 14 | 14 | 14 | 13 | 12 | 12 | 17 |
|     | X | 15 | 12 | 15 | 13 | 14 | 14 | 13 | 13 | 10 | 10 | 8  | 13.2 | 12 | 12 | 11 | 16 | 10 | 10 | 9  | 12 | 17 |

|     |   |    |    |    |    |    |    |    |    |     |    |    |      |    |    |    |    |    |    |    |    |    |
|-----|---|----|----|----|----|----|----|----|----|-----|----|----|------|----|----|----|----|----|----|----|----|----|
| N03 |   |    |    |    |    |    |    |    |    |     |    |    |      |    |    |    |    |    |    |    |    |    |
| 0   | X | 15 | 17 | 16 | 15 | 14 | 14 | 14 | 16 | 11  | 11 | 12 | 15   | 13 | 12 | 12 | 16 | 13 | 12 | 12 | 14 | 18 |
| N03 | X | 14 | 17 | 11 | 12 | 14 | 13 | 13 | 14 | 10  | 8  | 8  | 13   | 11 | 7  | 13 | 14 | 14 | 13 | 12 | 12 | 17 |
| 1   | X | 18 | 17 | 15 | 13 | 15 | 13 | 14 | 16 | 11  | 10 | 12 | 15.2 | 14 | 12 | 15 | 14 | 14 | 13 | 12 | 13 | 20 |
| N03 | X | 14 | 12 | 15 | 15 | 14 | 13 | 13 | 13 | 11  | 12 | 8  | 13   | 11 | 7  | 11 | 14 | 14 | 11 | 9  | 11 | 17 |
| 2   | X | 14 | 18 | 16 | 16 | 14 | 14 | 14 | 14 | 11  | 13 | 9  | 14   | 13 | 12 | 14 | 15 | 14 | 12 | 13 | 13 | 17 |
| N03 | X | 14 | 16 | 11 | 13 | 14 | 12 | 10 | 13 | 10  | 10 | 8  | 12   | 12 | 11 | 11 | 14 | 14 | 10 | 11 | 14 | 14 |
| 3   | X | 14 | 17 | 15 | 14 | 16 | 15 | 14 | 14 | 12  | 12 | 8  | 14.2 | 12 | 12 | 11 | 14 | 14 | 12 | 12 | 14 | 17 |
| N03 | X | 17 | 12 | 14 | 14 | 14 | 14 | 13 | 13 | 12  | 8  | 9  | 15   | 12 | 7  | 13 | 13 | 13 | 12 | 11 | 12 | 17 |
| 4   | X | 17 | 17 | 16 | 14 | 14 | 15 | 14 | 13 | 12  | 13 | 10 | 15.2 | 13 | 11 | 14 | 14 | 14 | 13 | 13 | 12 | 18 |
| N03 | X | 15 | 15 | 11 | 14 | 10 | 15 | 13 | 14 | 11  | 8  | 8  | 13   | 11 | 7  | 11 | 13 | 14 | 13 | 9  | 12 | 18 |
| 5   | X | 15 | 17 | 15 | 15 | 14 | 16 | 14 | 14 | 11  | 10 | 8  | 13   | 12 | 12 | 11 | 14 | 14 | 14 | 11 | 13 | 20 |
| N03 | X | 14 | 16 | 15 | 13 | 14 | 14 | 13 | 14 | 11  | 10 | 9  | 13   | 11 | 7  | 11 | 13 | 13 | 11 | 9  | 13 | 14 |
| 6   | X | 14 | 18 | 17 | 16 | 14 | 16 | 14 | 17 | 13  | 10 | 10 | 13.2 | 12 | 7  | 13 | 14 | 14 | 12 | 12 | 13 | 18 |
| N03 | X | 14 | 12 | 15 | 13 | 13 | 13 | 13 | 15 | 10  | 8  | 8  | 13.2 | 11 | 7  | 13 | 13 | 13 | 12 | 12 | 11 | 18 |
| 7   | X | 17 | 14 | 16 | 16 | 14 | 14 | 14 | 15 | 10  | 12 | 9  | 14   | 13 | 12 | 13 | 14 | 14 | 13 | 13 | 15 | 23 |
| N03 | X | 15 | 16 | 11 | 13 | 14 | 15 | 13 | 13 | 10  | 10 | 9  | 13.2 | 11 | 11 | 11 | 13 | 13 | 10 | 10 | 11 | 14 |
| 8   | X | 16 | 18 | 11 | 14 | 15 | 16 | 14 | 15 | 12  | 11 | 12 | 16.2 | 12 | 11 | 14 | 15 | 14 | 13 | 11 | 14 | 17 |
| N03 | X | 14 | 12 | 11 | 15 | 14 | 14 | 13 | 15 | 10  | 8  | 9  | 13   | 11 | 12 | 11 | 13 | 14 | 12 | 10 | 13 | 14 |
| 9   | X | 14 | 17 | 16 | 15 | 15 | 14 | 13 | 17 | 11  | 12 | 10 | 15   | 12 | 12 | 14 | 14 | 14 | 13 | 11 | 13 | 18 |
| N04 | X | 14 | 17 | 11 | 13 | 14 | 15 | 13 | 15 | 10  | 10 | 8  | 13   | 10 | 11 | 13 | 13 | 10 | 12 | 10 | 12 | 14 |
| 0   | X | 14 | 17 | 15 | 14 | 16 | 15 | 14 | 16 | 12  | 12 | 10 | 14.2 | 12 | 12 | 14 | 13 | 14 | 13 | 12 | 12 | 17 |
| N04 | X | 15 | 12 | 11 | 13 | 14 | 16 | 14 | 14 | 11  | 10 | 9  | 13   | 11 | 7  | 13 | 13 | 13 | 13 | 12 | 13 | 14 |
| 1   | X | 17 | 12 | 11 | 14 | 14 | 16 | 14 | 16 | 12  | 12 | 10 | 15   | 12 | 11 | 14 | 13 | 14 | 13 | 12 | 14 | 18 |
| N04 | X | 14 | 17 | 15 | 13 | 13 | 12 | 10 | 13 | 10  | 10 | 8  | 13   | 9  | 7  | 13 | 14 | 14 | 12 | 11 | 12 | 14 |
| 2   | X | 14 | 17 | 17 | 14 | 16 | 15 | 13 | 15 | 11  | 12 | 10 | 13   | 11 | 12 | 16 | 15 | 14 | 12 | 13 | 12 | 14 |
| N04 | X | 15 | 17 | 15 | 13 | 14 | 14 | 13 | 13 | 9.1 | 10 | 8  | 14   | 11 | 7  | 11 | 16 | 14 | 13 | 9  | 11 | 14 |
| 3   | X | 16 | 17 | 17 | 13 | 14 | 16 | 14 | 14 | 11  | 10 | 9  | 14.2 | 11 | 11 | 11 | 16 | 14 | 13 | 10 | 11 | 18 |
| N04 | X | 14 | 12 | 16 | 13 | 13 | 14 | 13 | 15 | 10  | 8  | 10 | 13   | 11 | 7  | 11 | 13 | 14 | 13 | 9  | 11 | 17 |
| 4   | X | 16 | 15 | 17 | 13 | 14 | 15 | 14 | 15 | 11  | 12 | 11 | 14   | 13 | 12 | 14 | 16 | 14 | 13 | 13 | 12 | 18 |
|     | X | 14 | 17 | 15 | 13 | 13 | 14 | 13 | 13 | 12  | 10 | 9  | 13   | 12 | 7  | 11 | 16 | 13 | 13 | 11 | 12 | 14 |



|     |   |    |    |    |    |    |    |    |    |      |    |    |      |    |    |    |    |    |    |    |    |    |
|-----|---|----|----|----|----|----|----|----|----|------|----|----|------|----|----|----|----|----|----|----|----|----|
| N04 |   |    |    |    |    |    |    |    |    |      |    |    |      |    |    |    |    |    |    |    |    |    |
| 5   | X | 15 | 18 | 17 | 13 | 14 | 16 | 14 | 15 | 14   | 13 | 9  | 13.2 | 13 | 7  | 15 | 16 | 14 | 13 | 12 | 14 | 18 |
| N04 | X | 16 | 17 | 11 | 13 | 15 | 14 | 13 | 15 | 11   | 8  | 8  | 13.2 | 13 | 7  | 13 | 13 | 14 | 12 | 11 | 12 | 17 |
| 6   | X | 16 | 17 | 11 | 15 | 15 | 15 | 14 | 16 | 12   | 12 | 8  | 14.2 | 14 | 11 | 14 | 14 | 14 | 12 | 13 | 13 | 17 |
| N04 | X | 14 | 12 | 15 | 12 | 14 | 14 | 13 | 14 | 10   | 10 | 9  | 14.2 | 11 | 7  | 11 | 13 | 11 | 11 | 12 | 12 | 14 |
| 7   | X | 15 | 17 | 16 | 16 | 14 | 15 | 13 | 16 | 14   | 11 | 9  | 15   | 12 | 8  | 11 | 14 | 15 | 13 | 13 | 13 | 17 |
| N04 | X | 14 | 16 | 16 | 13 | 13 | 15 | 13 | 14 | 10   | 8  | 9  | 14   | 11 | 7  | 11 | 13 | 13 | 12 | 12 | 12 | 17 |
| 8   | X | 14 | 17 | 17 | 13 | 14 | 15 | 14 | 16 | 12   | 8  | 11 | 16.2 | 13 | 11 | 11 | 14 | 14 | 13 | 12 | 12 | 18 |
| N04 | X | 14 | 12 | 11 | 14 | 14 | 13 | 13 | 14 | 10   | 8  | 8  | 13   | 12 | 7  | 11 | 14 | 14 | 14 | 11 | 12 | 14 |
| 9   | X | 14 | 12 | 16 | 14 | 14 | 15 | 14 | 17 | 11   | 10 | 10 | 14.2 | 13 | 12 | 13 | 16 | 14 | 14 | 11 | 12 | 18 |
| N05 | X | 14 | 12 | 11 | 13 | 14 | 13 | 13 | 15 | 10   | 10 | 9  | 13   | 12 | 7  | 11 | 14 | 10 | 11 | 9  | 12 | 14 |
| 0   | X | 14 | 17 | 15 | 14 | 14 | 14 | 13 | 16 | 11   | 12 | 9  | 13   | 15 | 11 | 11 | 16 | 10 | 12 | 12 | 16 | 18 |
| N05 | X | 14 | 12 | 16 | 13 | 14 | 13 | 14 | 13 | 12   | 8  | 10 | 14.2 | 11 | 7  | 11 | 14 | 10 | 11 | 12 | 11 | 17 |
| 1   | X | 15 | 12 | 17 | 15 | 14 | 14 | 14 | 16 | 14   | 8  | 11 | 15   | 12 | 10 | 15 | 14 | 14 | 13 | 13 | 13 | 17 |
| N05 | X | 17 | 12 | 11 | 15 | 14 | 13 | 13 | 15 | 11   | 8  | 8  | 13   | 10 | 7  | 11 | 13 | 14 | 12 | 12 | 11 | 14 |
| 2   | X | 18 | 16 | 11 | 16 | 14 | 16 | 13 | 17 | 14   | 8  | 8  | 14   | 11 | 11 | 14 | 14 | 14 | 13 | 12 | 12 | 18 |
| N05 | X | 15 | 12 | 11 | 12 | 14 | 16 | 13 | 14 | 11   | 10 | 8  | 14   | 12 | 7  | 11 | 14 | 14 | 12 | 11 | 11 | 17 |
| 3   | X | 15 | 16 | 14 | 14 | 14 | 16 | 14 | 15 | 11   | 11 | 9  | 14   | 14 | 7  | 11 | 15 | 15 | 13 | 12 | 12 | 17 |
| N05 | X | 14 | 12 | 11 | 14 | 13 | 14 | 13 | 14 | 15   | 12 | 10 | 14   | 12 | 11 | 11 | 15 | 13 | 10 | 9  | 11 | 17 |
| 4   | X | 14 | 16 | 16 | 14 | 14 | 16 | 14 | 14 | 15   | 13 | 10 | 14.2 | 12 | 12 | 13 | 15 | 14 | 12 | 9  | 14 | 18 |
| N05 | X | 14 | 12 | 11 | 14 | 15 | 13 | 10 | 15 | 10   | 10 | 10 | 14   | 12 | 11 | 11 | 13 | 13 | 11 | 9  | 11 | 14 |
| 5   | X | 15 | 12 | 11 | 14 | 16 | 13 | 14 | 15 | 12   | 12 | 10 | 16.2 | 12 | 11 | 11 | 13 | 14 | 13 | 12 | 12 | 14 |
| N05 | X | 15 | 12 | 15 | 13 | 13 | 14 | 13 | 15 | 11   | 8  | 9  | 14.2 | 13 | 7  | 11 | 15 | 13 | 13 | 12 | 11 | 14 |
| 6   | X | 15 | 17 | 16 | 15 | 14 | 15 | 15 | 16 | 13   | 12 | 10 | 15   | 13 | 7  | 14 | 15 | 13 | 13 | 13 | 12 | 18 |
| N05 | X | 14 | 12 | 11 | 13 | 14 | 14 | 12 | 13 | 10   | 12 | 8  | 14.2 | 11 | 12 | 12 | 14 | 10 | 11 | 9  | 12 | 17 |
| 7   | X | 15 | 17 | 11 | 15 | 14 | 16 | 14 | 16 | 10   | 12 | 10 | 15   | 12 | 12 | 13 | 14 | 13 | 13 | 13 | 12 | 17 |
| N05 | X | 14 | 14 | 11 | 13 | 14 | 14 | 12 | 13 | 10   | 10 | 8  | 14   | 12 | 7  | 11 | 14 | 14 | 12 | 11 | 11 | 17 |
| 8   | X | 14 | 16 | 11 | 13 | 16 | 15 | 14 | 14 | 11.3 | 12 | 8  | 16.2 | 13 | 11 | 13 | 14 | 14 | 13 | 12 | 15 | 17 |
| N05 | X | 14 | 17 | 15 | 14 | 13 | 12 | 12 | 14 | 12   | 13 | 9  | 14   | 12 | 7  | 11 | 14 | 13 | 11 | 9  | 12 | 14 |
| 9   | X | 14 | 17 | 16 | 15 | 14 | 13 | 13 | 15 | 13   | 13 | 11 | 14   | 12 | 12 | 11 | 15 | 14 | 12 | 12 | 14 | 17 |
|     | X | 14 | 16 | 16 | 12 | 14 | 12 | 13 | 15 | 10   | 10 | 8  | 13   | 12 | 11 | 11 | 13 | 13 | 11 | 9  | 11 | 17 |

|     |   |    |    |    |    |    |    |    |    |    |    |    |      |    |    |    |    |    |    |    |    |    |
|-----|---|----|----|----|----|----|----|----|----|----|----|----|------|----|----|----|----|----|----|----|----|----|
| N06 |   |    |    |    |    |    |    |    |    |    |    |    |      |    |    |    |    |    |    |    |    |    |
| 0   | X | 14 | 17 | 16 | 13 | 16 | 15 | 14 | 15 | 12 | 11 | 9  | 14.2 | 14 | 12 | 13 | 14 | 14 | 13 | 9  | 12 | 18 |
| N06 | X | 14 | 15 | 17 | 12 | 13 | 12 | 13 | 13 | 11 | 8  | 9  | 14   | 9  | 12 | 11 | 14 | 13 | 13 | 9  | 12 | 17 |
| 1   | X | 14 | 18 | 18 | 15 | 14 | 13 | 14 | 14 | 11 | 12 | 10 | 14.2 | 12 | 12 | 14 | 15 | 14 | 13 | 11 | 13 | 18 |
| N06 | X | 15 | 12 | 15 | 13 | 15 | 14 | 13 | 13 | 11 | 10 | 9  | 14   | 12 | 7  | 13 | 13 | 10 | 12 | 9  | 12 | 17 |
| 2   | X | 18 | 16 | 16 | 16 | 15 | 14 | 14 | 14 | 14 | 10 | 11 | 15   | 12 | 7  | 13 | 15 | 14 | 13 | 12 | 12 | 17 |
| N06 | X | 15 | 16 | 11 | 13 | 14 | 14 | 14 | 14 | 11 | 8  | 9  | 13   | 10 | 7  | 11 | 14 | 13 | 13 | 12 | 11 | 14 |
| 3   | X | 15 | 17 | 18 | 15 | 14 | 16 | 14 | 15 | 11 | 12 | 10 | 14   | 10 | 11 | 11 | 14 | 13 | 13 | 13 | 11 | 14 |
| N06 | X | 14 | 17 | 15 | 15 | 14 | 14 | 13 | 13 | 11 | 10 | 10 | 14.2 | 12 | 7  | 11 | 13 | 13 | 13 | 11 | 11 | 17 |
| 4   | X | 15 | 18 | 16 | 15 | 15 | 16 | 14 | 15 | 13 | 10 | 10 | 17   | 14 | 12 | 14 | 14 | 14 | 14 | 12 | 12 | 17 |
| N06 | X | 15 | 12 | 11 | 13 | 16 | 15 | 13 | 13 | 10 | 10 | 8  | 14   | 12 | 7  | 10 | 14 | 11 | 12 | 12 | 11 | 14 |
| 5   | X | 17 | 12 | 16 | 17 | 16 | 16 | 15 | 15 | 12 | 13 | 11 | 15   | 13 | 12 | 14 | 14 | 13 | 14 | 13 | 12 | 17 |
| N06 | X | 15 | 16 | 11 | 14 | 14 | 14 | 13 | 16 | 10 | 10 | 9  | 14   | 11 | 7  | 11 | 13 | 14 | 13 | 12 | 11 | 14 |
| 6   | X | 16 | 18 | 16 | 14 | 15 | 15 | 14 | 16 | 11 | 10 | 9  | 15   | 12 | 12 | 14 | 14 | 14 | 13 | 13 | 12 | 17 |
| N06 | X | 14 | 12 | 11 | 13 | 14 | 15 | 13 | 13 | 11 | 10 | 9  | 13   | 12 | 12 | 11 | 14 | 11 | 12 | 9  | 12 | 18 |
| 7   | X | 15 | 17 | 17 | 16 | 14 | 16 | 14 | 14 | 11 | 10 | 11 | 16   | 13 | 13 | 11 | 14 | 13 | 12 | 11 | 14 | 20 |
| N06 | X | 14 | 14 | 11 | 12 | 14 | 14 | 12 | 13 | 11 | 12 | 10 | 13   | 11 | 7  | 11 | 13 | 13 | 11 | 9  | 13 | 17 |
| 8   | X | 15 | 17 | 16 | 13 | 15 | 15 | 13 | 14 | 12 | 12 | 12 | 13   | 13 | 11 | 14 | 14 | 14 | 13 | 13 | 13 | 20 |
| N06 | X | 14 | 12 | 11 | 13 | 14 | 12 | 12 | 15 | 12 | 8  | 9  | 14   | 12 | 12 | 11 | 13 | 13 | 14 | 9  | 11 | 14 |
| 9   | X | 14 | 17 | 11 | 14 | 15 | 14 | 13 | 15 | 14 | 10 | 9  | 15.2 | 14 | 12 | 11 | 14 | 14 | 16 | 11 | 13 | 17 |
| N07 | X | 15 | 16 | 15 | 13 | 14 | 14 | 13 | 14 | 10 | 8  | 8  | 15.2 | 11 | 11 | 11 | 13 | 13 | 12 | 9  | 11 | 17 |
| 0   | X | 16 | 17 | 17 | 13 | 14 | 15 | 13 | 15 | 12 | 13 | 10 | 16   | 13 | 12 | 14 | 15 | 14 | 13 | 14 | 13 | 18 |
| N07 | X | 14 | 14 | 16 | 13 | 14 | 12 | 13 | 13 | 11 | 8  | 9  | 14.2 | 11 | 7  | 11 | 14 | 14 | 11 | 13 | 12 | 14 |
| 1   | X | 14 | 17 | 16 | 14 | 14 | 15 | 13 | 14 | 11 | 13 | 11 | 17.2 | 13 | 7  | 14 | 14 | 14 | 12 | 13 | 13 | 14 |
| N07 | X | 14 | 12 | 16 | 13 | 14 | 14 | 13 | 14 | 11 | 9  | 8  | 13   | 12 | 12 | 11 | 14 | 13 | 12 | 9  | 14 | 17 |
| 2   | X | 15 | 17 | 16 | 13 | 14 | 15 | 14 | 15 | 11 | 13 | 9  | 15   | 12 | 12 | 13 | 14 | 14 | 13 | 12 | 14 | 17 |
| N07 | X | 14 | 16 | 15 | 15 | 14 | 14 | 13 | 13 | 10 | 12 | 8  | 14   | 12 | 7  | 13 | 13 | 14 | 11 | 11 | 12 | 17 |
| 3   | X | 14 | 17 | 17 | 16 | 14 | 15 | 14 | 14 | 11 | 13 | 9  | 14.2 | 12 | 11 | 15 | 14 | 15 | 11 | 13 | 14 | 17 |
| N07 | X | 15 | 16 | 16 | 14 | 14 | 15 | 13 | 13 | 11 | 8  | 10 | 13   | 11 | 12 | 11 | 10 | 11 | 13 | 9  | 12 | 14 |
| 4   | X | 16 | 17 | 17 | 16 | 15 | 17 | 14 | 13 | 12 | 10 | 11 | 13   | 11 | 12 | 14 | 13 | 14 | 13 | 12 | 14 | 14 |
|     | X | 14 | 12 | 16 | 14 | 14 | 13 | 13 | 15 | 11 | 10 | 8  | 13   | 12 | 7  | 11 | 14 | 13 | 12 | 7  | 12 | 14 |

|     |   |    |    |    |    |    |    |    |    |      |    |    |      |    |    |    |    |    |    |    |    |    |
|-----|---|----|----|----|----|----|----|----|----|------|----|----|------|----|----|----|----|----|----|----|----|----|
| N07 |   |    |    |    |    |    |    |    |    |      |    |    |      |    |    |    |    |    |    |    |    |    |
| 5   | X | 17 | 17 | 16 | 16 | 15 | 15 | 14 | 15 | 11   | 12 | 10 | 13.2 | 13 | 11 | 14 | 15 | 14 | 13 | 12 | 13 | 18 |
| N07 | X | 15 | 17 | 10 | 13 | 15 | 15 | 13 | 13 | 11   | 13 | 11 | 14   | 12 | 7  | 11 | 14 | 13 | 11 | 8  | 12 | 17 |
| 6   | X | 15 | 18 | 17 | 15 | 15 | 16 | 14 | 14 | 14   | 13 | 11 | 15   | 12 | 7  | 11 | 14 | 13 | 13 | 12 | 13 | 18 |
| N07 | X | 14 | 14 | 16 | 13 | 14 | 14 | 14 | 14 | 11   | 10 | 9  | 13   | 12 | 11 | 11 | 13 | 10 | 12 | 9  | 13 | 14 |
| 7   | X | 15 | 17 | 16 | 15 | 14 | 16 | 14 | 15 | 11   | 10 | 10 | 15.2 | 12 | 12 | 14 | 14 | 14 | 13 | 13 | 13 | 17 |
| N07 | X | 14 | 17 | 11 | 13 | 10 | 13 | 14 | 15 | 11.3 | 8  | 8  | 12   | 11 | 7  | 11 | 14 | 13 | 11 | 9  | 13 | 17 |
| 8   | X | 16 | 17 | 17 | 14 | 13 | 14 | 14 | 15 | 12   | 12 | 10 | 14   | 13 | 13 | 12 | 14 | 14 | 14 | 12 | 14 | 18 |
| N07 | X | 14 | 16 | 11 | 12 | 14 | 12 | 14 | 15 | 11   | 8  | 9  | 13   | 10 | 11 | 11 | 14 | 13 | 11 | 11 | 11 | 14 |
| 9   | X | 15 | 17 | 14 | 15 | 15 | 14 | 14 | 16 | 12   | 12 | 10 | 14.2 | 13 | 12 | 11 | 14 | 14 | 13 | 11 | 11 | 20 |
| N08 | X | 15 | 12 | 16 | 12 | 14 | 14 | 13 | 15 | 10   | 10 | 9  | 12   | 11 | 11 | 14 | 12 | 14 | 12 | 11 | 13 | 14 |
| 0   | X | 15 | 17 | 17 | 14 | 14 | 15 | 14 | 16 | 10   | 12 | 9  | 14   | 11 | 11 | 14 | 14 | 14 | 13 | 12 | 13 | 14 |
| N08 | X | 15 | 12 | 17 | 13 | 15 | 14 | 14 | 13 | 10   | 10 | 9  | 14   | 12 | 12 | 11 | 13 | 10 | 12 | 12 | 12 | 14 |
| 1   | X | 17 | 16 | 17 | 14 | 15 | 14 | 14 | 15 | 11   | 12 | 10 | 14   | 13 | 12 | 13 | 14 | 14 | 13 | 12 | 14 | 17 |
| N08 | X | 14 | 16 | 17 | 13 | 14 | 13 | 13 | 13 | 13   | 10 | 8  | 14   | 11 | 11 | 11 | 13 | 11 | 12 | 11 | 13 | 17 |
| 2   | X | 15 | 18 | 17 | 16 | 14 | 14 | 14 | 14 | 14   | 10 | 8  | 14.2 | 12 | 13 | 14 | 14 | 14 | 13 | 13 | 14 | 20 |
| N08 | X | 14 | 12 | 11 | 15 | 10 | 15 | 14 | 13 | 10   | 8  | 8  | 14   | 11 | 7  | 11 | 15 | 12 | 11 | 9  | 11 | 17 |
| 3   | X | 16 | 17 | 15 | 16 | 16 | 16 | 14 | 13 | 12   | 8  | 9  | 14   | 13 | 12 | 11 | 16 | 14 | 13 | 11 | 12 | 17 |
| N08 | X | 15 | 12 | 15 | 13 | 13 | 9  | 13 | 14 | 10   | 10 | 9  | 15   | 12 | 7  | 11 | 12 | 13 | 10 | 11 | 11 | 14 |
| 4   | X | 15 | 17 | 17 | 13 | 16 | 16 | 13 | 15 | 11   | 13 | 10 | 15.2 | 13 | 7  | 13 | 14 | 14 | 14 | 12 | 12 | 18 |
| N08 | X | 14 | 12 | 11 | 12 | 12 | 16 | 14 | 15 | 10   | 11 | 9  | 13   | 12 | 7  | 11 | 14 | 10 | 12 | 12 | 11 | 14 |
| 5   | X | 16 | 17 | 11 | 15 | 14 | 17 | 14 | 17 | 10   | 13 | 10 | 15   | 12 | 7  | 14 | 16 | 11 | 13 | 12 | 14 | 17 |
| N08 | X | 14 | 18 | 15 | 15 | 14 | 15 | 10 | 15 | 10   | 8  | 9  | 13   | 12 | 7  | 11 | 14 | 13 | 12 | 12 | 12 | 18 |
| 6   | X | 15 | 18 | 16 | 16 | 14 | 16 | 13 | 15 | 13   | 10 | 10 | 16.2 | 13 | 7  | 11 | 14 | 14 | 13 | 14 | 15 | 18 |
| N08 | X | 14 | 12 | 11 | 13 | 14 | 13 | 12 | 14 | 11   | 12 | 8  | 14   | 13 | 7  | 11 | 14 | 14 | 12 | 9  | 12 | 14 |
| 7   | X | 15 | 17 | 16 | 15 | 15 | 14 | 12 | 15 | 14   | 12 | 10 | 15.2 | 13 | 12 | 15 | 14 | 14 | 13 | 10 | 14 | 18 |
| N08 | X | 14 | 12 | 17 | 13 | 14 | 15 | 13 | 15 | 11   | 8  | 9  | 13   | 12 | 7  | 11 | 15 | 11 | 10 | 9  | 12 | 18 |
| 8   | X | 16 | 17 | 17 | 16 | 15 | 16 | 14 | 15 | 12   | 12 | 12 | 14.2 | 13 | 11 | 11 | 16 | 15 | 13 | 10 | 14 | 20 |
| N08 | X | 14 | 16 | 11 | 12 | 14 | 14 | 13 | 13 | 11   | 12 | 8  | 14   | 11 | 7  | 12 | 14 | 10 | 11 | 11 | 13 | 14 |
| 9   | X | 15 | 17 | 11 | 16 | 14 | 15 | 14 | 13 | 11   | 12 | 9  | 14.2 | 12 | 11 | 13 | 14 | 14 | 12 | 12 | 14 | 18 |
|     | X | 14 | 17 | 16 | 13 | 14 | 14 | 13 | 13 | 11   | 8  | 8  | 13   | 12 | 11 | 11 | 14 | 14 | 12 | 10 | 12 | 17 |

|     |   |    |    |    |    |    |    |    |    |    |    |    |      |    |    |    |    |    |    |    |    |    |
|-----|---|----|----|----|----|----|----|----|----|----|----|----|------|----|----|----|----|----|----|----|----|----|
| N09 |   |    |    |    |    |    |    |    |    |    |    |    |      |    |    |    |    |    |    |    |    |    |
| 0   | X | 15 | 17 | 17 | 13 | 15 | 14 | 13 | 15 | 13 | 13 | 8  | 14   | 12 | 12 | 11 | 14 | 14 | 13 | 12 | 13 | 21 |
| N09 | X | 16 | 16 | 15 | 13 | 13 | 14 | 14 | 13 | 11 | 12 | 9  | 13   | 12 | 7  | 13 | 14 | 13 | 11 | 11 | 13 | 14 |
| 1   | X | 17 | 17 | 17 | 15 | 14 | 15 | 14 | 14 | 11 | 12 | 9  | 14.2 | 13 | 12 | 14 | 15 | 14 | 13 | 11 | 13 | 17 |
| N09 | X | 16 | 12 | 11 | 12 | 13 | 13 | 13 | 15 | 11 | 10 | 8  | 12   | 12 | 7  | 11 | 13 | 13 | 13 | 10 | 12 | 18 |
| 2   | X | 16 | 16 | 15 | 13 | 15 | 14 | 13 | 17 | 12 | 13 | 9  | 15   | 12 | 12 | 15 | 16 | 14 | 13 | 13 | 12 | 18 |
| N09 | X | 15 | 12 | 15 | 13 | 15 | 15 | 13 | 14 | 12 | 10 | 9  | 12   | 9  | 11 | 11 | 15 | 13 | 13 | 11 | 12 | 17 |
| 3   | X | 16 | 17 | 16 | 14 | 16 | 15 | 14 | 15 | 12 | 12 | 11 | 14   | 12 | 12 | 13 | 16 | 15 | 13 | 12 | 13 | 18 |
| N09 | X | 14 | 12 | 14 | 13 | 10 | 15 | 14 | 13 | 10 | 8  | 10 | 14.2 | 12 | 7  | 11 | 14 | 13 | 12 | 12 | 11 | 17 |
| 4   | X | 14 | 17 | 16 | 14 | 16 | 16 | 14 | 13 | 10 | 10 | 11 | 15   | 13 | 12 | 13 | 14 | 14 | 13 | 12 | 11 | 18 |
| N09 | X | 15 | 12 | 11 | 14 | 14 | 14 | 14 | 14 | 11 | 10 | 8  | 14   | 12 | 12 | 11 | 14 | 11 | 13 | 9  | 11 | 14 |
| 5   | X | 15 | 16 | 17 | 14 | 14 | 14 | 14 | 15 | 14 | 10 | 10 | 15.2 | 12 | 12 | 14 | 15 | 12 | 14 | 11 | 12 | 17 |
| N09 | X | 14 | 16 | 16 | 13 | 14 | 14 | 14 | 15 | 10 | 10 | 9  | 13   | 10 | 11 | 11 | 13 | 13 | 13 | 12 | 13 | 14 |
| 6   | X | 17 | 17 | 17 | 14 | 15 | 15 | 14 | 16 | 10 | 12 | 11 | 14   | 13 | 13 | 14 | 13 | 14 | 13 | 12 | 14 | 17 |
| N09 | X | 15 | 17 | 11 | 14 | 14 | 15 | 14 | 13 | 10 | 10 | 8  | 13   | 11 | 7  | 13 | 14 | 11 | 12 | 10 | 11 | 14 |
| 7   | X | 15 | 17 | 16 | 16 | 16 | 17 | 14 | 14 | 11 | 11 | 11 | 16.2 | 12 | 12 | 14 | 16 | 14 | 13 | 11 | 12 | 17 |
| N09 | X | 14 | 12 | 16 | 15 | 14 | 13 | 13 | 14 | 10 | 12 | 9  | 14.2 | 11 | 7  | 11 | 14 | 11 | 10 | 9  | 12 | 18 |
| 8   | X | 16 | 16 | 16 | 16 | 14 | 13 | 13 | 14 | 10 | 12 | 10 | 15   | 12 | 12 | 14 | 15 | 14 | 13 | 9  | 15 | 18 |
| N09 | X | 14 | 15 | 11 | 13 | 15 | 14 | 13 | 15 | 11 | 8  | 8  | 14   | 12 | 11 | 11 | 13 | 14 | 12 | 11 | 11 | 17 |
| 9   | X | 15 | 17 | 16 | 14 | 15 | 16 | 13 | 16 | 11 | 11 | 11 | 15   | 12 | 12 | 14 | 14 | 14 | 12 | 11 | 14 | 18 |
| N10 | X | 14 | 12 | 11 | 13 | 15 | 13 | 14 | 13 | 12 | 8  | 9  | 14   | 12 | 11 | 11 | 13 | 14 | 11 | 10 | 13 | 14 |
| 0   | X | 17 | 14 | 17 | 13 | 15 | 15 | 14 | 14 | 12 | 12 | 9  | 15   | 13 | 12 | 14 | 14 | 14 | 12 | 12 | 14 | 14 |
| N10 | X | 14 | 15 | 15 | 14 | 14 | 13 | 12 | 13 | 9  | 10 | 9  | 13   | 12 | 7  | 11 | 13 | 14 | 13 | 11 | 11 | 14 |
| 1   | X | 16 | 16 | 16 | 15 | 14 | 15 | 13 | 15 | 10 | 12 | 9  | 14   | 12 | 12 | 15 | 14 | 14 | 14 | 12 | 12 | 17 |
| N10 | X | 14 | 17 | 11 | 13 | 14 | 12 | 13 | 14 | 11 | 10 | 9  | 13   | 12 | 11 | 11 | 13 | 14 | 12 | 10 | 11 | 14 |
| 2   | X | 17 | 17 | 11 | 14 | 15 | 15 | 14 | 15 | 14 | 12 | 11 | 13   | 12 | 11 | 11 | 13 | 14 | 13 | 10 | 13 | 20 |
| N10 | X | 14 | 17 | 11 | 13 | 14 | 13 | 13 | 13 | 10 | 8  | 9  | 13   | 11 | 12 | 13 | 13 | 14 | 12 | 12 | 13 | 17 |
| 3   | X | 14 | 17 | 17 | 14 | 15 | 14 | 14 | 15 | 14 | 8  | 9  | 16.2 | 13 | 13 | 14 | 16 | 14 | 13 | 13 | 13 | 17 |
| N10 | X | 14 | 16 | 16 | 12 | 14 | 15 | 12 | 13 | 10 | 10 | 10 | 14   | 12 | 7  | 11 | 12 | 10 | 12 | 10 | 11 | 17 |
| 4   | X | 15 | 17 | 16 | 15 | 15 | 15 | 14 | 15 | 14 | 10 | 10 | 15   | 12 | 12 | 12 | 15 | 14 | 13 | 13 | 14 | 17 |
|     | X | 14 | 12 | 16 | 13 | 15 | 12 | 13 | 14 | 10 | 8  | 8  | 13   | 13 | 7  | 11 | 12 | 14 | 13 | 10 | 12 | 14 |

|     |   |    |    |    |    |    |    |    |    |    |    |    |      |    |    |    |    |    |    |    |    |    |
|-----|---|----|----|----|----|----|----|----|----|----|----|----|------|----|----|----|----|----|----|----|----|----|
| N10 |   |    |    |    |    |    |    |    |    |    |    |    |      |    |    |    |    |    |    |    |    |    |
| 5   | X | 16 | 17 | 17 | 15 | 15 | 15 | 14 | 15 | 12 | 8  | 9  | 14.2 | 15 | 12 | 11 | 13 | 15 | 15 | 12 | 12 | 17 |
| N10 | X | 15 | 17 | 11 | 13 | 13 | 13 | 13 | 13 | 11 | 10 | 10 | 14   | 11 | 7  | 11 | 10 | 11 | 13 | 10 | 12 | 14 |
| 6   | X | 15 | 17 | 16 | 14 | 15 | 14 | 14 | 14 | 14 | 10 | 11 | 15.2 | 12 | 12 | 13 | 16 | 13 | 14 | 11 | 12 | 18 |
| N10 | X | 14 | 16 | 15 | 13 | 14 | 13 | 13 | 13 | 10 | 8  | 8  | 14.2 | 12 | 11 | 11 | 12 | 11 | 12 | 9  | 12 | 14 |
| 7   | X | 15 | 18 | 17 | 14 | 15 | 14 | 14 | 15 | 11 | 12 | 9  | 16   | 13 | 12 | 11 | 15 | 14 | 13 | 11 | 13 | 17 |
| N10 | X | 14 | 12 | 11 | 14 | 14 | 14 | 13 | 16 | 11 | 10 | 8  | 15.2 | 11 | 7  | 11 | 14 | 11 | 10 | 11 | 12 | 17 |
| 8   | X | 15 | 17 | 16 | 16 | 15 | 14 | 14 | 16 | 12 | 13 | 11 | 16.2 | 13 | 12 | 11 | 15 | 13 | 12 | 14 | 14 | 23 |
| N10 | X | 14 | 12 | 15 | 14 | 14 | 12 | 13 | 13 | 11 | 8  | 10 | 13   | 12 | 7  | 13 | 15 | 14 | 13 | 9  | 11 | 14 |
| 9   | X | 14 | 17 | 16 | 14 | 16 | 17 | 14 | 16 | 12 | 11 | 10 | 15.2 | 12 | 12 | 13 | 15 | 14 | 13 | 13 | 14 | 18 |
| N11 | X | 14 | 12 | 15 | 13 | 13 | 14 | 13 | 14 | 11 | 10 | 10 | 13   | 12 | 7  | 13 | 14 | 11 | 11 | 11 | 14 | 14 |
| 0   | X | 17 | 16 | 16 | 13 | 15 | 14 | 14 | 16 | 12 | 12 | 10 | 14.2 | 12 | 13 | 14 | 14 | 11 | 11 | 12 | 14 | 17 |
| N11 | X | 14 | 12 | 16 | 13 | 14 | 12 | 12 | 14 | 12 | 10 | 8  | 15.2 | 13 | 7  | 11 | 14 | 10 | 12 | 12 | 10 | 14 |
| 1   | X | 15 | 17 | 17 | 13 | 15 | 14 | 13 | 14 | 15 | 13 | 12 | 15.2 | 13 | 7  | 12 | 16 | 13 | 12 | 12 | 12 | 18 |
| N11 | X | 15 | 12 | 11 | 13 | 14 | 15 | 12 | 14 | 10 | 10 | 9  | 13   | 12 | 7  | 11 | 15 | 10 | 12 | 9  | 13 | 17 |
| 2   | X | 16 | 12 | 17 | 13 | 14 | 16 | 12 | 15 | 14 | 10 | 10 | 13.2 | 12 | 12 | 15 | 15 | 11 | 13 | 11 | 14 | 19 |
| N11 | X | 14 | 12 | 16 | 13 | 14 | 13 | 13 | 15 | 12 | 10 | 8  | 13   | 12 | 7  | 11 | 14 | 13 | 10 | 11 | 14 | 14 |
| 3   | X | 17 | 17 | 16 | 17 | 16 | 15 | 14 | 15 | 14 | 10 | 8  | 14   | 13 | 11 | 14 | 14 | 14 | 13 | 12 | 15 | 17 |
| N11 | X | 14 | 16 | 11 | 12 | 14 | 14 | 13 | 14 | 9  | 10 | 8  | 13   | 11 | 7  | 11 | 13 | 13 | 13 | 9  | 11 | 14 |
| 4   | X | 14 | 17 | 16 | 14 | 15 | 16 | 14 | 15 | 10 | 10 | 9  | 15   | 12 | 12 | 13 | 16 | 14 | 13 | 13 | 12 | 17 |
| N11 | X | 14 | 12 | 16 | 14 | 10 | 15 | 13 | 14 | 11 | 8  | 9  | 13.2 | 11 | 11 | 11 | 14 | 14 | 12 | 11 | 12 | 17 |
| 5   | X | 17 | 12 | 16 | 14 | 14 | 16 | 14 | 14 | 14 | 12 | 11 | 13.2 | 12 | 11 | 11 | 15 | 14 | 13 | 13 | 13 | 18 |
| N11 | X | 14 | 15 | 17 | 13 | 14 | 13 | 14 | 13 | 10 | 8  | 9  | 14   | 12 | 7  | 13 | 14 | 11 | 12 | 11 | 13 | 17 |
| 6   | X | 15 | 17 | 17 | 14 | 15 | 16 | 14 | 15 | 10 | 12 | 10 | 14.2 | 12 | 11 | 14 | 15 | 14 | 13 | 11 | 16 | 18 |
| N11 | X | 15 | 17 | 11 | 15 | 14 | 13 | 13 | 15 | 10 | 12 | 9  | 14.2 | 11 | 7  | 11 | 13 | 11 | 11 | 11 | 11 | 14 |
| 7   | X | 15 | 17 | 16 | 16 | 14 | 15 | 14 | 15 | 11 | 12 | 9  | 15.2 | 12 | 7  | 11 | 15 | 13 | 12 | 12 | 12 | 17 |
| N11 | X | 13 | 11 | 8  | 8  | 9  | 9  | 10 | 12 | 7  | 7  | 7  | 9    | 8  | 7  | 10 | 9  | 10 | 8  | 7  | 8  | 13 |
| 8   | Y | 14 | 12 | 9  | 9  | 10 | 10 | 11 | 13 | 8  | 8  | 8  | 10   | 9  | 8  | 11 | 10 | 11 | 9  | 8  | 9  | 14 |
| N11 | X | 15 | 12 | 16 | 13 | 14 | 14 | 13 | 15 | 11 | 10 | 10 | 13   | 11 | 7  | 11 | 14 | 13 | 11 | 11 | 13 | 14 |
| 9   | Y | 15 | 17 | 17 | 15 | 14 | 16 | 14 | 15 | 12 | 10 | 11 | 14.2 | 12 | 7  | 11 | 14 | 15 | 13 | 12 | 14 | 14 |
|     | X | 14 | 12 | 15 | 15 | 15 | 13 | 13 | 13 | 12 | 8  | 9  | 14   | 12 | 7  | 11 | 12 | 13 | 12 | 9  | 11 | 17 |

|     |   |      |    |    |    |    |    |    |    |    |    |    |      |    |    |    |    |    |    |    |    |    |
|-----|---|------|----|----|----|----|----|----|----|----|----|----|------|----|----|----|----|----|----|----|----|----|
| N12 |   |      |    |    |    |    |    |    |    |    |    |    |      |    |    |    |    |    |    |    |    |    |
| 0   | Y | 15   | 17 | 17 | 15 | 15 | 14 | 14 | 14 | 14 | 10 | 10 | 14   | 12 | 7  | 14 | 13 | 13 | 13 | 10 | 14 | 18 |
| N12 | X | 15   | 12 | 15 | 13 | 14 | 15 | 13 | 13 | 10 | 8  | 9  | 15.2 | 13 | 11 | 11 | 14 | 13 | 13 | 9  | 11 | 14 |
| 1   | Y | 15   | 12 | 16 | 14 | 15 | 17 | 14 | 14 | 11 | 10 | 10 | 17   | 13 | 12 | 13 | 15 | 14 | 13 | 13 | 13 | 17 |
| N12 | X | 15   | 12 | 11 | 13 | 14 | 14 | 13 | 14 | 13 | 8  | 9  | 13   | 12 | 7  | 11 | 14 | 13 | 12 | 12 | 12 | 14 |
| 2   | Y | 15   | 12 | 15 | 15 | 14 | 15 | 13 | 15 | 14 | 10 | 10 | 15   | 12 | 7  | 11 | 14 | 14 | 13 | 13 | 14 | 17 |
| N12 | X | 14   | 12 | 11 | 13 | 14 | 13 | 14 | 14 | 11 | 12 | 8  | 15   | 12 | 11 | 11 | 15 | 10 | 12 | 10 | 12 | 18 |
| 3   | Y | 15   | 17 | 11 | 14 | 15 | 13 | 14 | 15 | 12 | 13 | 8  | 16.2 | 13 | 12 | 14 | 15 | 14 | 13 | 11 | 13 | 18 |
| N12 | X | 16   | 12 | 15 | 14 | 14 | 12 | 12 | 15 | 10 | 8  | 8  | 13   | 9  | 12 | 11 | 14 | 14 | 12 | 10 | 10 | 17 |
| 4   | Y | 17   | 15 | 16 | 17 | 16 | 15 | 12 | 16 | 11 | 10 | 9  | 14.2 | 9  | 12 | 11 | 16 | 14 | 13 | 12 | 12 | 17 |
| N12 | X | 15   | 12 | 11 | 13 | 14 | 15 | 13 | 15 | 10 | 10 | 8  | 14   | 11 | 7  | 11 | 14 | 13 | 12 | 12 | 13 | 14 |
| 5   | Y | 15   | 12 | 11 | 13 | 15 | 16 | 14 | 15 | 14 | 12 | 9  | 14.2 | 13 | 7  | 15 | 15 | 14 | 13 | 13 | 13 | 14 |
| N12 | X | 14   | 12 | 11 | 12 | 14 | 16 | 13 | 14 | 11 | 12 | 9  | 13   | 12 | 7  | 11 | 14 | 10 | 12 | 12 | 12 | 14 |
| 6   | Y | 16   | 16 | 11 | 15 | 15 | 16 | 14 | 15 | 11 | 12 | 9  | 14   | 13 | 12 | 14 | 14 | 13 | 13 | 12 | 13 | 18 |
| N12 | X | 14   | 12 | 11 | 13 | 14 | 15 | 13 | 16 | 10 | 10 | 9  | 13   | 11 | 7  | 11 | 10 | 14 | 13 | 12 | 11 | 14 |
| 7   | Y | 15   | 16 | 11 | 13 | 15 | 15 | 13 | 16 | 11 | 11 | 9  | 14   | 12 | 12 | 14 | 14 | 15 | 13 | 12 | 12 | 14 |
| N12 | X | 14   | 12 | 11 | 14 | 14 | 13 | 13 | 13 | 11 | 10 | 8  | 15.2 | 12 | 7  | 11 | 14 | 14 | 12 | 11 | 11 | 17 |
| 8   | Y | 17   | 16 | 11 | 16 | 16 | 14 | 14 | 15 | 11 | 12 | 8  | 16.2 | 13 | 7  | 11 | 16 | 16 | 13 | 12 | 12 | 17 |
| N12 | X | 14   | 16 | 20 | 13 | 14 | 13 | 14 | 14 | 10 | 8  | 8  | 15.2 | 9  | 7  | 11 | 14 | 14 | 10 | 9  | 11 | 17 |
| 9   | Y | 14   | 17 | 20 | 13 | 15 | 16 | 14 | 14 | 12 | 10 | 11 | 15.2 | 12 | 7  | 12 | 16 | 14 | 12 | 13 | 13 | 17 |
| N13 | X | 14   | 13 | 11 | 13 | 14 | 12 | 10 | 13 | 10 | 8  | 8  | 13   | 11 | 7  | 12 | 14 | 11 | 13 | 9  | 12 | 17 |
| 0   | Y | 14.3 | 16 | 15 | 14 | 15 | 15 | 13 | 14 | 10 | 8  | 10 | 13.2 | 12 | 12 | 15 | 16 | 11 | 15 | 9  | 13 | 17 |
| N13 | X | 14   | 16 | 15 | 13 | 13 | 13 | 13 | 14 | 11 | 8  | 8  | 13   | 11 | 12 | 11 | 14 | 10 | 11 | 11 | 12 | 14 |
| 1   | Y | 14   | 16 | 16 | 14 | 15 | 14 | 14 | 15 | 12 | 12 | 8  | 14   | 14 | 12 | 11 | 14 | 13 | 11 | 12 | 12 | 18 |
| N13 | X | 14   | 16 | 15 | 12 | 14 | 15 | 13 | 13 | 10 | 12 | 8  | 14   | 11 | 11 | 11 | 13 | 14 | 11 | 9  | 14 | 14 |
| 2   | Y | 14   | 17 | 17 | 15 | 14 | 15 | 13 | 14 | 11 | 13 | 8  | 15   | 12 | 13 | 13 | 16 | 15 | 13 | 13 | 14 | 23 |
| N13 | X | 17   | 12 | 15 | 13 | 14 | 16 | 10 | 15 | 11 | 12 | 8  | 14   | 12 | 7  | 14 | 13 | 14 | 11 | 11 | 11 | 14 |
| 3   | Y | 18   | 17 | 16 | 13 | 15 | 17 | 14 | 16 | 12 | 13 | 10 | 14   | 13 | 11 | 14 | 13 | 14 | 13 | 12 | 11 | 14 |
| N13 | X | 14   | 12 | 16 | 14 | 15 | 13 | 13 | 13 | 10 | 10 | 8  | 15   | 12 | 11 | 11 | 13 | 14 | 13 | 11 | 11 | 14 |
| 4   | Y | 14.3 | 17 | 17 | 17 | 15 | 16 | 13 | 15 | 12 | 10 | 10 | 15.2 | 12 | 11 | 15 | 14 | 14 | 13 | 12 | 12 | 17 |
|     | X | 14.3 | 12 | 15 | 13 | 15 | 13 | 10 | 14 | 10 | 10 | 9  | 13   | 12 | 7  | 11 | 13 | 10 | 13 | 12 | 11 | 14 |

|     |   |    |    |    |    |    |    |    |    |      |    |    |      |    |    |    |    |    |    |    |    |    |
|-----|---|----|----|----|----|----|----|----|----|------|----|----|------|----|----|----|----|----|----|----|----|----|
| N13 |   |    |    |    |    |    |    |    |    |      |    |    |      |    |    |    |    |    |    |    |    |    |
| 5   | Y | 16 | 12 | 15 | 14 | 15 | 16 | 14 | 15 | 11   | 12 | 9  | 15.2 | 13 | 12 | 11 | 14 | 13 | 14 | 12 | 12 | 18 |
| N13 | X | 14 | 12 | 11 | 13 | 10 | 11 | 13 | 14 | 10   | 10 | 9  | 15   | 12 | 7  | 11 | 14 | 10 | 10 | 11 | 12 | 17 |
| 6   | Y | 15 | 17 | 15 | 14 | 14 | 15 | 13 | 15 | 14   | 10 | 10 | 15.2 | 12 | 12 | 14 | 14 | 14 | 13 | 12 | 14 | 18 |
| N13 | X | 14 | 12 | 11 | 15 | 13 | 10 | 14 | 14 | 11   | 8  | 8  | 14   | 12 | 7  | 11 | 13 | 13 | 12 | 8  | 11 | 18 |
| 7   | Y | 14 | 16 | 11 | 16 | 14 | 14 | 15 | 14 | 12   | 12 | 10 | 14   | 13 | 7  | 14 | 14 | 13 | 13 | 9  | 12 | 20 |
| N13 | X | 14 | 16 | 11 | 13 | 14 | 14 | 13 | 13 | 12   | 10 | 10 | 14   | 13 | 7  | 11 | 14 | 10 | 12 | 11 | 11 | 17 |
| 8   | Y | 15 | 17 | 17 | 13 | 14 | 15 | 14 | 15 | 14   | 10 | 10 | 14   | 13 | 12 | 14 | 16 | 14 | 13 | 13 | 15 | 20 |
| N13 | X | 14 | 16 | 11 | 14 | 13 | 15 | 13 | 13 | 11   | 10 | 9  | 13   | 12 | 7  | 13 | 14 | 14 | 13 | 12 | 12 | 14 |
| 9   | Y | 14 | 17 | 17 | 16 | 14 | 16 | 14 | 14 | 11   | 10 | 9  | 14   | 12 | 12 | 14 | 16 | 14 | 13 | 12 | 14 | 17 |
| N14 | X | 14 | 16 | 16 | 13 | 12 | 14 | 14 | 15 | 10   | 10 | 9  | 15.2 | 11 | 7  | 11 | 14 | 14 | 11 | 9  | 12 | 14 |
| 0   | Y | 18 | 17 | 17 | 14 | 13 | 15 | 14 | 15 | 14   | 12 | 10 | 15.2 | 11 | 12 | 15 | 14 | 14 | 14 | 12 | 14 | 18 |
| N14 | X | 14 | 17 | 11 | 15 | 15 | 14 | 13 | 14 | 10   | 8  | 8  | 14.2 | 12 | 7  | 11 | 13 | 10 | 13 | 9  | 13 | 14 |
| 1   | Y | 15 | 17 | 17 | 16 | 15 | 15 | 14 | 14 | 11   | 12 | 8  | 14.2 | 12 | 11 | 14 | 14 | 14 | 13 | 11 | 14 | 14 |
| N14 | X | 15 | 12 | 11 | 13 | 14 | 15 | 13 | 13 | 12   | 12 | 9  | 14   | 11 | 7  | 11 | 14 | 14 | 12 | 12 | 12 | 14 |
| 2   | Y | 16 | 12 | 15 | 14 | 15 | 17 | 14 | 13 | 14   | 12 | 10 | 14   | 12 | 7  | 11 | 15 | 14 | 13 | 12 | 14 | 18 |
| N14 | X | 14 | 16 | 11 | 13 | 11 | 13 | 14 | 15 | 11   | 11 | 8  | 13.2 | 12 | 7  | 11 | 13 | 13 | 12 | 11 | 11 | 14 |
| 3   | Y | 16 | 17 | 16 | 15 | 14 | 15 | 14 | 16 | 11   | 13 | 9  | 14.2 | 13 | 12 | 11 | 14 | 14 | 12 | 11 | 12 | 20 |
| N14 | X | 15 | 12 | 15 | 13 | 14 | 14 | 13 | 13 | 10   | 10 | 10 | 15.2 | 11 | 7  | 12 | 10 | 11 | 13 | 8  | 12 | 17 |
| 4   | Y | 16 | 16 | 15 | 14 | 15 | 15 | 13 | 15 | 14   | 10 | 11 | 16.2 | 12 | 12 | 14 | 15 | 14 | 13 | 11 | 13 | 18 |
| N14 | X | 14 | 15 | 11 | 14 | 13 | 14 | 10 | 13 | 10   | 10 | 8  | 14   | 12 | 11 | 11 | 15 | 11 | 12 | 11 | 11 | 17 |
| 5   | Y | 17 | 17 | 11 | 15 | 15 | 15 | 12 | 15 | 11   | 12 | 10 | 14   | 12 | 12 | 14 | 15 | 14 | 13 | 11 | 12 | 23 |
| N14 | X | 14 | 16 | 11 | 13 | 14 | 12 | 13 | 13 | 11   | 10 | 8  | 13   | 9  | 7  | 11 | 14 | 10 | 13 | 12 | 12 | 14 |
| 6   | Y | 15 | 17 | 16 | 16 | 14 | 16 | 13 | 13 | 12   | 13 | 9  | 14.2 | 11 | 11 | 13 | 14 | 13 | 15 | 12 | 12 | 17 |
| N14 | X | 14 | 12 | 15 | 14 | 14 | 14 | 10 | 15 | 10   | 12 | 8  | 14   | 10 | 12 | 11 | 14 | 11 | 13 | 10 | 13 | 17 |
| 7   | Y | 15 | 17 | 17 | 15 | 14 | 15 | 14 | 15 | 11.3 | 13 | 10 | 14.2 | 12 | 13 | 14 | 14 | 13 | 13 | 11 | 13 | 20 |
| N14 | X | 14 | 12 | 11 | 13 | 14 | 14 | 13 | 13 | 11   | 8  | 10 | 14.2 | 9  | 7  | 11 | 13 | 11 | 13 | 13 | 11 | 18 |
| 8   | Y | 17 | 12 | 11 | 14 | 15 | 15 | 14 | 16 | 11   | 10 | 12 | 15   | 12 | 13 | 13 | 14 | 14 | 15 | 14 | 14 | 18 |
| N14 | X | 14 | 12 | 11 | 12 | 13 | 14 | 10 | 13 | 11   | 8  | 8  | 14   | 12 | 7  | 13 | 13 | 10 | 12 | 10 | 13 | 14 |
| 9   | Y | 15 | 17 | 17 | 14 | 15 | 15 | 14 | 14 | 13   | 13 | 9  | 14.2 | 12 | 7  | 14 | 15 | 14 | 13 | 13 | 14 | 14 |
|     | X | 16 | 12 | 11 | 14 | 15 | 12 | 13 | 14 | 11   | 11 | 9  | 14   | 12 | 7  | 11 | 12 | 11 | 13 | 11 | 13 | 17 |

|     |   |    |    |    |    |    |    |    |    |      |    |    |      |    |    |    |    |    |    |    |    |    |
|-----|---|----|----|----|----|----|----|----|----|------|----|----|------|----|----|----|----|----|----|----|----|----|
| N15 |   |    |    |    |    |    |    |    |    |      |    |    |      |    |    |    |    |    |    |    |    |    |
| 0   | Y | 16 | 16 | 15 | 16 | 15 | 15 | 14 | 15 | 11   | 13 | 12 | 14.2 | 13 | 12 | 13 | 14 | 14 | 13 | 11 | 15 | 17 |
| N15 | X | 14 | 17 | 11 | 12 | 14 | 14 | 13 | 14 | 8    | 8  | 9  | 14.2 | 10 | 7  | 11 | 13 | 11 | 11 | 12 | 10 | 17 |
| 1   | Y | 17 | 17 | 15 | 14 | 14 | 15 | 14 | 14 | 11   | 10 | 9  | 16   | 12 | 7  | 13 | 14 | 14 | 18 | 14 | 14 | 23 |
| N15 | X | 14 | 16 | 14 | 15 | 15 | 16 | 13 | 15 | 11   | 8  | 9  | 13   | 12 | 7  | 11 | 14 | 13 | 11 | 9  | 12 | 14 |
| 2   | Y | 18 | 17 | 15 | 16 | 15 | 16 | 14 | 15 | 11   | 8  | 9  | 14.2 | 12 | 11 | 14 | 15 | 14 | 12 | 13 | 14 | 17 |
| N15 | X | 14 | 12 | 16 | 13 | 14 | 13 | 12 | 13 | 10   | 10 | 8  | 13   | 9  | 12 | 11 | 14 | 10 | 11 | 10 | 12 | 17 |
| 3   | Y | 16 | 12 | 17 | 16 | 15 | 15 | 14 | 13 | 10   | 11 | 10 | 14.2 | 10 | 13 | 12 | 14 | 14 | 13 | 12 | 14 | 17 |
| N15 | X | 14 | 12 | 15 | 13 | 14 | 13 | 13 | 15 | 11   | 8  | 9  | 14   | 12 | 7  | 11 | 13 | 13 | 10 | 9  | 12 | 14 |
| 4   | Y | 15 | 17 | 17 | 13 | 14 | 14 | 14 | 16 | 11   | 12 | 12 | 17   | 12 | 7  | 11 | 14 | 14 | 12 | 12 | 13 | 18 |
| N15 | X | 16 | 12 | 16 | 15 | 14 | 12 | 13 | 13 | 10   | 8  | 9  | 14.2 | 11 | 7  | 11 | 14 | 11 | 12 | 11 | 12 | 14 |
| 5   | Y | 16 | 17 | 17 | 15 | 14 | 14 | 14 | 14 | 10   | 10 | 9  | 15.2 | 11 | 12 | 14 | 14 | 14 | 12 | 12 | 12 | 18 |
| N15 | X | 15 | 14 | 11 | 13 | 14 | 12 | 14 | 14 | 10   | 11 | 8  | 13   | 12 | 12 | 11 | 13 | 14 | 13 | 11 | 13 | 14 |
| 6   | Y | 15 | 16 | 16 | 14 | 14 | 13 | 14 | 16 | 11   | 12 | 10 | 15.2 | 13 | 12 | 14 | 15 | 14 | 13 | 11 | 13 | 17 |
| N15 | X | 14 | 12 | 11 | 15 | 14 | 12 | 13 | 14 | 12   | 10 | 10 | 13   | 12 | 7  | 10 | 14 | 14 | 12 | 9  | 11 | 17 |
| 7   | Y | 14 | 18 | 11 | 16 | 15 | 16 | 14 | 15 | 13   | 10 | 10 | 13   | 12 | 13 | 11 | 16 | 14 | 12 | 10 | 13 | 18 |
| N15 | X | 15 | 12 | 16 | 14 | 14 | 15 | 13 | 13 | 10   | 8  | 9  | 14   | 11 | 7  | 11 | 14 | 14 | 10 | 12 | 12 | 14 |
| 8   | Y | 15 | 14 | 16 | 15 | 15 | 15 | 13 | 16 | 11   | 12 | 12 | 14   | 12 | 12 | 12 | 16 | 14 | 14 | 12 | 12 | 14 |
| N15 | X | 15 | 16 | 11 | 15 | 15 | 14 | 14 | 13 | 11   | 10 | 9  | 13   | 12 | 7  | 13 | 14 | 14 | 12 | 9  | 11 | 14 |
| 9   | Y | 15 | 17 | 15 | 15 | 15 | 16 | 14 | 14 | 11   | 12 | 10 | 15.2 | 13 | 11 | 14 | 14 | 14 | 13 | 11 | 11 | 17 |
| N16 | X | 14 | 14 | 11 | 12 | 14 | 16 | 14 | 13 | 10   | 10 | 8  | 14   | 12 | 7  | 13 | 14 | 13 | 12 | 11 | 11 | 14 |
| 0   | Y | 14 | 17 | 16 | 15 | 15 | 16 | 14 | 16 | 11   | 10 | 9  | 14   | 12 | 7  | 13 | 15 | 14 | 13 | 12 | 12 | 14 |
| N16 | X | 15 | 12 | 15 | 13 | 14 | 13 | 14 | 15 | 10   | 10 | 10 | 14   | 11 | 11 | 11 | 13 | 14 | 12 | 12 | 11 | 14 |
| 1   | Y | 15 | 14 | 16 | 13 | 15 | 15 | 14 | 16 | 11.3 | 12 | 10 | 14.2 | 13 | 12 | 13 | 15 | 14 | 13 | 12 | 13 | 18 |
| N16 | X | 13 | 12 | 15 | 13 | 14 | 13 | 14 | 14 | 10   | 12 | 9  | 13   | 12 | 11 | 11 | 14 | 13 | 12 | 10 | 10 | 14 |
| 2   | Y | 15 | 18 | 15 | 14 | 15 | 15 | 14 | 15 | 10   | 12 | 9  | 14   | 12 | 12 | 13 | 16 | 14 | 13 | 12 | 12 | 17 |
| N16 | X | 14 | 17 | 15 | 13 | 15 | 13 | 12 | 14 | 10   | 12 | 8  | 14   | 12 | 7  | 13 | 12 | 13 | 11 | 12 | 12 | 14 |
| 3   | Y | 17 | 17 | 16 | 16 | 15 | 16 | 13 | 16 | 14   | 13 | 9  | 15.2 | 14 | 7  | 13 | 14 | 13 | 13 | 12 | 12 | 17 |
| N16 | X | 14 | 14 | 11 | 12 | 14 | 14 | 13 | 15 | 11   | 10 | 9  | 12.2 | 11 | 7  | 13 | 12 | 10 | 12 | 11 | 12 | 17 |
| 4   | Y | 15 | 17 | 15 | 15 | 14 | 15 | 14 | 15 | 12   | 12 | 9  | 13   | 13 | 12 | 15 | 14 | 14 | 13 | 12 | 12 | 20 |
|     | X | 14 | 12 | 11 | 13 | 14 | 15 | 12 | 14 | 10   | 10 | 10 | 14   | 10 | 10 | 11 | 13 | 11 | 13 | 9  | 12 | 14 |



|     |   |    |    |    |    |    |    |    |    |      |    |    |      |    |    |    |    |    |    |    |    |    |
|-----|---|----|----|----|----|----|----|----|----|------|----|----|------|----|----|----|----|----|----|----|----|----|
| N16 |   |    |    |    |    |    |    |    |    |      |    |    |      |    |    |    |    |    |    |    |    |    |
| 5   | Y | 16 | 17 | 11 | 15 | 15 | 15 | 13 | 15 | 13   | 10 | 11 | 15   | 11 | 12 | 12 | 14 | 13 | 13 | 9  | 15 | 20 |
| N16 | X | 15 | 17 | 11 | 13 | 14 | 13 | 12 | 15 | 10   | 10 | 9  | 13   | 12 | 11 | 11 | 13 | 10 | 12 | 10 | 11 | 14 |
| 6   | Y | 15 | 18 | 15 | 13 | 15 | 16 | 14 | 15 | 11.3 | 12 | 10 | 14.2 | 12 | 12 | 13 | 16 | 14 | 13 | 12 | 12 | 14 |
| N16 | X | 16 | 17 | 11 | 13 | 14 | 12 | 13 | 13 | 10   | 12 | 9  | 13   | 12 | 12 | 13 | 14 | 12 | 13 | 11 | 13 | 14 |
| 7   | Y | 16 | 18 | 15 | 14 | 15 | 15 | 14 | 13 | 14   | 12 | 12 | 14.2 | 13 | 12 | 13 | 14 | 14 | 15 | 11 | 15 | 18 |
| N16 | X | 16 | 17 | 11 | 14 | 14 | 14 | 13 | 15 | 10   | 10 | 9  | 13   | 12 | 7  | 11 | 13 | 12 | 11 | 9  | 12 | 17 |
| 8   | Y | 18 | 18 | 11 | 14 | 15 | 16 | 13 | 16 | 11   | 13 | 10 | 15.2 | 12 | 7  | 13 | 13 | 13 | 12 | 11 | 12 | 18 |
| N16 | X | 14 | 16 | 15 | 13 | 14 | 13 | 13 | 15 | 11   | 8  | 8  | 14   | 11 | 7  | 11 | 14 | 11 | 13 | 11 | 11 | 17 |
| 9   | Y | 15 | 17 | 16 | 15 | 15 | 14 | 14 | 17 | 14   | 10 | 9  | 15.2 | 12 | 12 | 12 | 15 | 14 | 13 | 13 | 14 | 18 |
| N17 | X | 14 | 12 | 17 | 12 | 14 | 15 | 14 | 15 | 10   | 10 | 8  | 13   | 12 | 7  | 11 | 13 | 11 | 12 | 10 | 12 | 17 |
| 0   | Y | 16 | 17 | 17 | 16 | 14 | 16 | 14 | 16 | 10   | 11 | 9  | 15   | 12 | 7  | 14 | 14 | 13 | 12 | 11 | 12 | 17 |
| N17 | X | 15 | 17 | 11 | 13 | 14 | 11 | 12 | 15 | 10   | 10 | 8  | 13   | 9  | 12 | 11 | 14 | 13 | 12 | 9  | 12 | 17 |
| 1   | Y | 15 | 18 | 11 | 13 | 14 | 14 | 14 | 16 | 10   | 11 | 9  | 14   | 12 | 12 | 14 | 15 | 13 | 12 | 12 | 15 | 17 |
| N17 | X | 14 | 14 | 11 | 15 | 14 | 13 | 12 | 13 | 10   | 10 | 8  | 14   | 12 | 12 | 13 | 12 | 14 | 12 | 9  | 11 | 14 |
| 2   | Y | 15 | 17 | 17 | 15 | 14 | 16 | 12 | 14 | 11   | 12 | 9  | 16.2 | 12 | 13 | 14 | 14 | 14 | 12 | 11 | 13 | 18 |
| N17 | X | 16 | 12 | 16 | 12 | 15 | 13 | 13 | 15 | 10   | 10 | 9  | 13   | 12 | 7  | 11 | 13 | 10 | 13 | 12 | 11 | 14 |
| 3   | Y | 17 | 17 | 17 | 13 | 15 | 16 | 13 | 16 | 11   | 12 | 11 | 14.2 | 14 | 12 | 14 | 14 | 15 | 14 | 12 | 14 | 18 |
| N17 | X | 14 | 16 | 16 | 14 | 14 | 12 | 13 | 13 | 9.1  | 10 | 10 | 14   | 11 | 12 | 11 | 12 | 12 | 11 | 11 | 12 | 14 |
| 4   | Y | 15 | 17 | 16 | 14 | 15 | 14 | 14 | 15 | 11   | 10 | 12 | 14   | 12 | 12 | 11 | 16 | 14 | 12 | 12 | 13 | 17 |
| N17 | X | 14 | 12 | 15 | 16 | 10 | 14 | 13 | 15 | 10   | 8  | 9  | 14.2 | 12 | 7  | 11 | 14 | 10 | 13 | 9  | 11 | 14 |
| 5   | Y | 15 | 17 | 17 | 16 | 14 | 16 | 14 | 16 | 11   | 11 | 10 | 14.2 | 12 | 7  | 15 | 16 | 14 | 13 | 11 | 12 | 17 |
| N17 | X | 15 | 12 | 15 | 13 | 15 | 15 | 13 | 14 | 12   | 10 | 9  | 13   | 12 | 11 | 11 | 13 | 11 | 13 | 12 | 12 | 17 |
| 6   | Y | 16 | 17 | 17 | 13 | 16 | 15 | 14 | 15 | 14   | 12 | 10 | 14.2 | 13 | 11 | 14 | 14 | 11 | 14 | 12 | 12 | 20 |
| N17 | X | 14 | 16 | 16 | 13 | 13 | 15 | 13 | 15 | 11   | 8  | 9  | 13   | 13 | 7  | 11 | 14 | 10 | 11 | 11 | 12 | 14 |
| 7   | Y | 14 | 17 | 17 | 14 | 14 | 15 | 14 | 16 | 11   | 12 | 10 | 16.2 | 13 | 12 | 11 | 14 | 10 | 13 | 12 | 13 | 20 |
| N17 | X | 16 | 17 | 15 | 13 | 14 | 13 | 13 | 13 | 11   | 8  | 9  | 13   | 9  | 12 | 11 | 13 | 14 | 10 | 9  | 11 | 17 |
| 8   | Y | 16 | 17 | 15 | 16 | 16 | 14 | 14 | 13 | 12   | 10 | 9  | 16   | 11 | 12 | 15 | 14 | 14 | 13 | 12 | 11 | 18 |
| N17 | X | 14 | 16 | 11 | 13 | 13 | 13 | 13 | 14 | 11   | 10 | 9  | 14   | 12 | 7  | 11 | 14 | 11 | 13 | 9  | 12 | 14 |
| 9   | Y | 15 | 18 | 15 | 13 | 16 | 16 | 14 | 15 | 13   | 13 | 11 | 14   | 13 | 13 | 13 | 15 | 14 | 13 | 12 | 12 | 18 |
|     | X | 14 | 16 | 11 | 13 | 14 | 12 | 14 | 13 | 10   | 12 | 9  | 12.2 | 12 | 7  | 11 | 13 | 14 | 12 | 11 | 11 | 14 |

|     |   |    |    |    |    |    |    |    |    |    |    |    |      |    |    |    |    |    |    |    |    |    |
|-----|---|----|----|----|----|----|----|----|----|----|----|----|------|----|----|----|----|----|----|----|----|----|
| N18 |   |    |    |    |    |    |    |    |    |    |    |    |      |    |    |    |    |    |    |    |    |    |
| 0   | Y | 15 | 16 | 11 | 15 | 14 | 14 | 14 | 14 | 14 | 12 | 9  | 13   | 13 | 11 | 13 | 14 | 14 | 13 | 13 | 12 | 17 |
| N18 | X | 15 | 17 | 15 | 14 | 14 | 15 | 14 | 13 | 10 | 8  | 8  | 14   | 12 | 7  | 11 | 14 | 11 | 12 | 9  | 13 | 17 |
| 1   | Y | 15 | 17 | 16 | 14 | 14 | 16 | 14 | 14 | 13 | 12 | 9  | 15.2 | 13 | 12 | 11 | 15 | 14 | 13 | 9  | 14 | 18 |
| N18 | X | 15 | 12 | 11 | 13 | 14 | 13 | 13 | 13 | 10 | 8  | 9  | 14.2 | 9  | 12 | 12 | 13 | 14 | 10 | 12 | 11 | 18 |
| 2   | Y | 15 | 17 | 15 | 13 | 16 | 17 | 14 | 15 | 11 | 13 | 10 | 16   | 13 | 12 | 15 | 13 | 14 | 12 | 12 | 11 | 18 |
| N18 | X | 15 | 17 | 16 | 13 | 14 | 15 | 13 | 14 | 10 | 10 | 8  | 15.2 | 12 | 7  | 11 | 13 | 13 | 13 | 12 | 12 | 14 |
| 3   | Y | 16 | 17 | 17 | 14 | 15 | 15 | 14 | 16 | 12 | 12 | 10 | 16   | 13 | 12 | 13 | 14 | 15 | 13 | 12 | 12 | 17 |
| N18 | X | 15 | 12 | 11 | 15 | 14 | 15 | 14 | 15 | 10 | 12 | 9  | 14   | 12 | 7  | 14 | 13 | 11 | 12 | 11 | 12 | 14 |
| 4   | Y | 15 | 17 | 17 | 17 | 14 | 15 | 14 | 15 | 12 | 13 | 12 | 14.2 | 13 | 7  | 15 | 15 | 14 | 12 | 14 | 13 | 18 |
| N18 | X | 14 | 16 | 11 | 13 | 14 | 14 | 12 | 15 | 10 | 12 | 9  | 13   | 12 | 7  | 12 | 15 | 11 | 13 | 12 | 13 | 17 |
| 5   | Y | 16 | 17 | 16 | 16 | 15 | 15 | 14 | 16 | 11 | 12 | 12 | 14   | 13 | 12 | 13 | 16 | 11 | 13 | 12 | 13 | 18 |
| N18 | X | 15 | 16 | 16 | 13 | 14 | 13 | 10 | 13 | 11 | 8  | 9  | 13   | 11 | 12 | 12 | 14 | 13 | 11 | 9  | 11 | 14 |
| 6   | Y | 15 | 17 | 17 | 16 | 16 | 16 | 14 | 14 | 12 | 10 | 10 | 13   | 13 | 12 | 15 | 16 | 14 | 13 | 12 | 12 | 14 |
| N18 | X | 15 | 12 | 11 | 13 | 14 | 13 | 13 | 14 | 10 | 12 | 8  | 14.2 | 13 | 7  | 13 | 13 | 11 | 12 | 11 | 12 | 17 |
| 7   | Y | 15 | 17 | 16 | 15 | 16 | 15 | 14 | 15 | 12 | 12 | 9  | 16   | 13 | 12 | 13 | 14 | 13 | 13 | 12 | 13 | 17 |
| N18 | X | 15 | 17 | 16 | 13 | 13 | 15 | 13 | 14 | 12 | 10 | 10 | 15.2 | 12 | 7  | 11 | 14 | 13 | 10 | 10 | 13 | 14 |
| 8   | Y | 17 | 17 | 17 | 14 | 14 | 16 | 14 | 14 | 12 | 10 | 10 | 15.2 | 14 | 7  | 11 | 14 | 14 | 12 | 11 | 14 | 20 |
| N18 | X | 14 | 12 | 16 | 13 | 14 | 13 | 14 | 14 | 10 | 8  | 10 | 14   | 12 | 7  | 11 | 15 | 11 | 13 | 9  | 12 | 14 |
| 9   | Y | 15 | 15 | 17 | 14 | 15 | 16 | 14 | 15 | 14 | 12 | 10 | 14.2 | 12 | 12 | 14 | 15 | 14 | 13 | 11 | 13 | 17 |
| N19 | X | 15 | 12 | 11 | 14 | 15 | 14 | 14 | 15 | 11 | 8  | 8  | 13   | 12 | 12 | 11 | 13 | 14 | 10 | 10 | 12 | 17 |
| 0   | Y | 15 | 14 | 17 | 15 | 15 | 14 | 14 | 16 | 12 | 12 | 9  | 14.2 | 14 | 12 | 11 | 15 | 15 | 13 | 13 | 12 | 17 |
| N19 | X | 14 | 12 | 11 | 15 | 14 | 14 | 14 | 15 | 11 | 10 | 8  | 14.2 | 12 | 10 | 11 | 14 | 11 | 13 | 10 | 11 | 14 |
| 1   | Y | 16 | 17 | 16 | 17 | 16 | 16 | 14 | 16 | 11 | 12 | 11 | 15.2 | 12 | 12 | 13 | 14 | 14 | 14 | 11 | 14 | 17 |
| N19 | X | 14 | 12 | 11 | 14 | 15 | 15 | 13 | 14 | 12 | 10 | 8  | 13   | 11 | 7  | 14 | 15 | 10 | 12 | 12 | 12 | 17 |
| 2   | Y | 17 | 12 | 16 | 14 | 15 | 15 | 14 | 14 | 14 | 10 | 8  | 16.2 | 12 | 11 | 14 | 16 | 14 | 13 | 13 | 13 | 20 |
| N19 | X | 14 | 16 | 16 | 14 | 13 | 13 | 13 | 15 | 10 | 10 | 8  | 14.2 | 12 | 7  | 13 | 15 | 14 | 11 | 12 | 12 | 14 |
| 3   | Y | 15 | 17 | 17 | 15 | 16 | 14 | 14 | 16 | 11 | 12 | 8  | 15   | 13 | 12 | 14 | 15 | 14 | 13 | 12 | 13 | 14 |
| N19 | X | 15 | 17 | 11 | 13 | 15 | 13 | 14 | 15 | 11 | 8  | 8  | 14   | 12 | 11 | 11 | 11 | 13 | 10 | 11 | 12 | 17 |
| 4   | Y | 15 | 17 | 16 | 15 | 15 | 14 | 14 | 17 | 14 | 8  | 8  | 16   | 13 | 12 | 11 | 14 | 14 | 13 | 12 | 13 | 17 |
|     | X | 14 | 12 | 11 | 15 | 14 | 14 | 14 | 15 | 11 | 8  | 9  | 14.2 | 12 | 7  | 11 | 13 | 14 | 12 | 10 | 12 | 17 |

|     |   |    |    |    |    |    |    |    |    |     |    |    |      |    |    |    |    |    |    |      |    |    |
|-----|---|----|----|----|----|----|----|----|----|-----|----|----|------|----|----|----|----|----|----|------|----|----|
| N19 |   |    |    |    |    |    |    |    |    |     |    |    |      |    |    |    |    |    |    |      |    |    |
| 5   | Y | 15 | 12 | 11 | 17 | 16 | 15 | 14 | 15 | 12  | 12 | 12 | 15   | 13 | 12 | 15 | 14 | 14 | 12 | 14   | 13 | 18 |
| N19 | X | 14 | 17 | 16 | 12 | 10 | 14 | 14 | 13 | 11  | 8  | 10 | 13   | 12 | 7  | 11 | 13 | 14 | 12 | 13   | 11 | 20 |
| 6   | Y | 14 | 17 | 17 | 14 | 15 | 16 | 14 | 16 | 12  | 10 | 10 | 13   | 12 | 12 | 11 | 14 | 14 | 13 | 13   | 11 | 23 |
| N19 | X | 14 | 12 | 11 | 13 | 15 | 12 | 14 | 14 | 11  | 9  | 11 | 12   | 11 | 12 | 13 | 13 | 13 | 10 | 11   | 11 | 14 |
| 7   | Y | 16 | 18 | 15 | 15 | 17 | 16 | 14 | 14 | 11  | 13 | 11 | 13.2 | 12 | 12 | 14 | 14 | 14 | 11 | 12   | 12 | 14 |
| N19 | X | 14 | 17 | 11 | 13 | 15 | 13 | 14 | 13 | 11  | 8  | 10 | 14   | 12 | 11 | 11 | 11 | 11 | 10 | 11   | 12 | 17 |
| 8   | Y | 15 | 17 | 15 | 15 | 15 | 14 | 14 | 17 | 14  | 13 | 12 | 16   | 12 | 12 | 13 | 14 | 14 | 12 | 12   | 13 | 17 |
| N19 | X | 15 | 17 | 17 | 13 | 14 | 14 | 13 | 13 | 10  | 8  | 8  | 13   | 12 | 11 | 11 | 13 | 10 | 12 | 11   | 13 | 17 |
| 9   | Y | 17 | 18 | 17 | 14 | 14 | 16 | 13 | 15 | 14  | 10 | 10 | 15   | 13 | 11 | 11 | 14 | 14 | 13 | 12   | 13 | 18 |
| N20 | X | 15 | 17 | 11 | 14 | 14 | 15 | 13 | 13 | 11  | 12 | 9  | 13   | 12 | 7  | 11 | 10 | 13 | 12 | 10   | 11 | 17 |
| 0   | Y | 15 | 18 | 16 | 15 | 14 | 16 | 14 | 16 | 14  | 13 | 9  | 13   | 13 | 7  | 13 | 15 | 14 | 12 | 11   | 14 | 20 |
| N20 | X | 14 | 14 | 11 | 13 | 14 | 14 | 12 | 13 | 9.1 | 10 | 9  | 13   | 10 | 7  | 11 | 12 | 10 | 10 | 9    | 10 | 17 |
| 1   | Y | 17 | 16 | 11 | 15 | 15 | 16 | 14 | 14 | 14  | 12 | 9  | 15.2 | 14 | 11 | 11 | 13 | 14 | 13 | 12   | 14 | 23 |
| N20 | X | 14 | 16 | 15 | 13 | 14 | 14 | 12 | 14 | 10  | 8  | 9  | 14.2 | 12 | 11 | 11 | 13 | 14 | 13 | 11.1 | 11 | 14 |
| 2   | Y | 17 | 17 | 17 | 14 | 14 | 14 | 14 | 16 | 11  | 14 | 10 | 14.2 | 12 | 12 | 13 | 14 | 14 | 13 | 12   | 13 | 17 |
| N20 | X | 14 | 12 | 11 | 15 | 14 | 13 | 13 | 13 | 12  | 8  | 10 | 13   | 11 | 7  | 11 | 13 | 13 | 13 | 10   | 11 | 14 |
| 3   | Y | 15 | 14 | 16 | 15 | 15 | 13 | 14 | 14 | 13  | 8  | 10 | 14   | 12 | 7  | 11 | 14 | 14 | 13 | 11   | 12 | 14 |
| N20 | X | 14 | 14 | 16 | 13 | 14 | 12 | 14 | 13 | 11  | 8  | 8  | 13   | 12 | 7  | 11 | 14 | 10 | 10 | 9    | 12 | 17 |
| 4   | Y | 17 | 17 | 16 | 15 | 14 | 14 | 14 | 15 | 14  | 10 | 10 | 14   | 12 | 7  | 11 | 14 | 13 | 11 | 11   | 15 | 17 |
| N20 | X | 14 | 16 | 11 | 13 | 14 | 14 | 13 | 13 | 11  | 10 | 9  | 15.2 | 12 | 7  | 11 | 13 | 14 | 12 | 9    | 12 | 18 |
| 5   | Y | 14 | 18 | 17 | 13 | 16 | 16 | 14 | 15 | 11  | 10 | 9  | 16.2 | 13 | 11 | 13 | 15 | 14 | 13 | 12   | 13 | 19 |
| N20 | X | 14 | 12 | 11 | 13 | 14 | 15 | 12 | 13 | 11  | 8  | 8  | 13   | 12 | 12 | 13 | 13 | 14 | 13 | 9    | 13 | 17 |
| 6   | Y | 15 | 17 | 17 | 14 | 14 | 16 | 14 | 15 | 12  | 13 | 9  | 13   | 14 | 12 | 14 | 14 | 14 | 13 | 14   | 14 | 20 |
| N20 | X | 14 | 16 | 16 | 13 | 14 | 16 | 13 | 14 | 10  | 8  | 8  | 13   | 12 | 7  | 11 | 13 | 14 | 11 | 11   | 11 | 17 |
| 7   | Y | 15 | 17 | 17 | 14 | 15 | 16 | 13 | 15 | 12  | 10 | 10 | 15   | 13 | 12 | 14 | 15 | 14 | 11 | 12   | 14 | 18 |
| N20 | X | 14 | 16 | 16 | 15 | 14 | 15 | 14 | 15 | 11  | 8  | 9  | 14   | 12 | 7  | 11 | 10 | 14 | 11 | 10   | 14 | 14 |
| 8   | Y | 15 | 17 | 17 | 16 | 17 | 16 | 14 | 15 | 11  | 10 | 10 | 14.2 | 12 | 7  | 13 | 12 | 14 | 12 | 13   | 16 | 17 |
| N20 | X | 14 | 14 | 11 | 13 | 14 | 14 | 13 | 14 | 12  | 10 | 8  | 13   | 12 | 7  | 11 | 14 | 10 | 11 | 11   | 11 | 14 |
| 9   | Y | 16 | 17 | 16 | 14 | 14 | 15 | 13 | 14 | 13  | 13 | 10 | 13   | 13 | 7  | 13 | 14 | 11 | 13 | 13   | 12 | 17 |
|     | X | 14 | 17 | 11 | 14 | 14 | 14 | 13 | 14 | 11  | 8  | 8  | 14   | 12 | 7  | 11 | 14 | 11 | 10 | 9    | 13 | 14 |

|     |   |    |    |    |    |    |    |    |    |      |    |    |      |      |    |    |    |    |    |      |    |    |
|-----|---|----|----|----|----|----|----|----|----|------|----|----|------|------|----|----|----|----|----|------|----|----|
| N21 |   |    |    |    |    |    |    |    |    |      |    |    |      |      |    |    |    |    |    |      |    |    |
| 0   | Y | 15 | 17 | 15 | 15 | 15 | 16 | 14 | 15 | 12   | 12 | 9  | 14.2 | 12   | 12 | 14 | 14 | 14 | 12 | 10   | 13 | 17 |
| N21 | X | 14 | 12 | 11 | 12 | 14 | 14 | 13 | 13 | 11   | 8  | 8  | 13   | 11   | 7  | 11 | 14 | 13 | 12 | 12   | 12 | 14 |
| 1   | Y | 17 | 14 | 16 | 14 | 15 | 15 | 14 | 14 | 11   | 10 | 11 | 14   | 12   | 11 | 13 | 14 | 14 | 12 | 12   | 12 | 14 |
| N21 | X | 14 | 17 | 11 | 13 | 14 | 14 | 14 | 15 | 11   | 8  | 8  | 13   | 12   | 12 | 11 | 13 | 14 | 13 | 11.1 | 12 | 18 |
| 2   | Y | 15 | 17 | 16 | 14 | 15 | 14 | 14 | 16 | 14   | 10 | 9  | 15.2 | 14   | 12 | 14 | 13 | 14 | 13 | 12   | 12 | 18 |
| N21 | X | 15 | 17 | 11 | 16 | 16 | 13 | 14 | 13 | 10   | 12 | 9  | 15.2 | 10   | 7  | 11 | 13 | 14 | 11 | 9    | 13 | 18 |
| 3   | Y | 16 | 17 | 16 | 17 | 16 | 17 | 14 | 16 | 13   | 13 | 10 | 16   | 12   | 7  | 14 | 14 | 14 | 13 | 9    | 13 | 18 |
| N21 | X | 15 | 12 | 15 | 12 | 13 | 15 | 13 | 14 | 11   | 10 | 8  | 14   | 12   | 7  | 11 | 13 | 10 | 13 | 10   | 12 | 14 |
| 4   | Y | 16 | 17 | 17 | 16 | 15 | 15 | 14 | 16 | 14   | 13 | 11 | 14.2 | 12   | 12 | 14 | 14 | 15 | 13 | 12   | 13 | 14 |
| N21 | X | 14 | 16 | 16 | 13 | 14 | 14 | 14 | 13 | 11   | 8  | 10 | 13   | 12   | 12 | 13 | 13 | 14 | 13 | 13   | 12 | 17 |
| 5   | Y | 15 | 17 | 16 | 14 | 15 | 15 | 14 | 16 | 11   | 10 | 11 | 16.2 | 13   | 12 | 13 | 14 | 14 | 13 | 14   | 14 | 18 |
| N21 | X | 14 | 16 | 11 | 13 | 15 | 15 | 14 | 15 | 10   | 8  | 9  | 13   | 12   | 7  | 14 | 14 | 14 | 12 | 12   | 12 | 17 |
| 6   | Y | 15 | 17 | 16 | 14 | 16 | 15 | 14 | 15 | 12   | 13 | 10 | 14   | 13   | 11 | 14 | 14 | 14 | 13 | 12   | 13 | 18 |
| N21 | X | 14 | 12 | 14 | 15 | 13 | 12 | 13 | 15 | 10   | 8  | 9  | 13   | 11   | 7  | 14 | 12 | 11 | 10 | 10   | 12 | 14 |
| 7   | Y | 15 | 17 | 17 | 16 | 15 | 15 | 14 | 15 | 10   | 8  | 11 | 14   | 11   | 7  | 15 | 14 | 14 | 13 | 12   | 12 | 17 |
| N21 | X | 14 | 17 | 11 | 12 | 13 | 14 | 13 | 13 | 11   | 10 | 8  | 14.2 | 12   | 7  | 13 | 14 | 13 | 11 | 12   | 12 | 14 |
| 8   | Y | 16 | 17 | 16 | 14 | 14 | 17 | 14 | 14 | 14   | 11 | 9  | 15   | 12   | 13 | 14 | 15 | 15 | 13 | 12   | 14 | 20 |
| N21 | X | 15 | 17 | 11 | 13 | 14 | 13 | 13 | 14 | 10   | 10 | 9  | 14   | 12   | 7  | 11 | 10 | 12 | 10 | 9    | 10 | 17 |
| 9   | Y | 16 | 17 | 17 | 15 | 15 | 14 | 14 | 17 | 14   | 12 | 9  | 14.2 | 12   | 12 | 13 | 16 | 14 | 12 | 10   | 12 | 17 |
| N22 | X | 14 | 12 | 11 | 11 | 14 | 13 | 13 | 14 | 9.1  | 10 | 9  | 13.2 | 12   | 7  | 11 | 14 | 13 | 12 | 11   | 11 | 17 |
| 0   | Y | 16 | 17 | 16 | 15 | 15 | 14 | 14 | 15 | 11.3 | 13 | 10 | 15   | 12   | 11 | 15 | 15 | 14 | 12 | 11   | 13 | 20 |
| N22 | X | 14 | 12 | 11 | 13 | 13 | 12 | 13 | 14 | 11   | 10 | 8  | 13.2 | 10.1 | 11 | 11 | 12 | 14 | 10 | 9    | 12 | 14 |
| 1   | Y | 14 | 18 | 11 | 15 | 14 | 16 | 14 | 14 | 12   | 12 | 9  | 15   | 12   | 12 | 11 | 13 | 14 | 13 | 11   | 14 | 17 |
| N22 | X | 15 | 17 | 15 | 12 | 14 | 12 | 13 | 13 | 12   | 10 | 10 | 14   | 12   | 7  | 13 | 14 | 13 | 12 | 12   | 12 | 18 |
| 2   | Y | 16 | 17 | 16 | 13 | 16 | 14 | 14 | 15 | 12   | 11 | 10 | 14   | 13   | 7  | 14 | 14 | 14 | 13 | 13   | 12 | 18 |
| N22 | X | 15 | 17 | 11 | 14 | 13 | 15 | 13 | 13 | 11   | 10 | 9  | 14   | 12   | 7  | 11 | 13 | 11 | 12 | 12   | 12 | 14 |
| 3   | Y | 17 | 17 | 17 | 15 | 14 | 15 | 14 | 14 | 12   | 15 | 11 | 16.2 | 12   | 7  | 14 | 14 | 13 | 13 | 12   | 12 | 20 |
| N22 | X | 15 | 12 | 14 | 14 | 14 | 14 | 13 | 13 | 10   | 10 | 10 | 13   | 12   | 7  | 10 | 14 | 13 | 13 | 9    | 13 | 18 |
| 4   | Y | 16 | 17 | 16 | 15 | 14 | 14 | 14 | 13 | 11   | 12 | 12 | 14   | 13   | 7  | 14 | 15 | 13 | 13 | 12   | 14 | 18 |
|     | X | 14 | 17 | 11 | 12 | 14 | 13 | 13 | 14 | 12   | 12 | 10 | 12   | 12   | 7  | 12 | 14 | 14 | 12 | 9    | 10 | 18 |

|     |   |    |    |    |    |    |    |    |    |    |    |    |      |    |    |    |    |    |    |    |    |    |
|-----|---|----|----|----|----|----|----|----|----|----|----|----|------|----|----|----|----|----|----|----|----|----|
| N22 |   |    |    |    |    |    |    |    |    |    |    |    |      |    |    |    |    |    |    |    |    |    |
| 5   | Y | 16 | 20 | 11 | 13 | 16 | 16 | 15 | 15 | 14 | 12 | 11 | 13   | 12 | 11 | 15 | 15 | 15 | 12 | 11 | 13 | 18 |
| N22 | X | 14 | 12 | 11 | 13 | 14 | 14 | 13 | 13 | 11 | 8  | 8  | 14   | 11 | 7  | 13 | 13 | 10 | 12 | 9  | 13 | 14 |
| 6   | Y | 16 | 18 | 17 | 15 | 14 | 15 | 13 | 15 | 12 | 11 | 10 | 15.2 | 12 | 12 | 13 | 15 | 13 | 13 | 12 | 15 | 18 |
| N22 | X | 16 | 12 | 11 | 13 | 14 | 15 | 13 | 14 | 12 | 12 | 9  | 13   | 12 | 11 | 11 | 14 | 14 | 12 | 11 | 12 | 17 |
| 7   | Y | 16 | 14 | 16 | 13 | 15 | 16 | 14 | 16 | 14 | 14 | 9  | 14.2 | 12 | 12 | 14 | 16 | 14 | 13 | 14 | 13 | 17 |
| N22 | X | 14 | 17 | 16 | 12 | 15 | 12 | 13 | 14 | 12 | 8  | 9  | 15   | 11 | 7  | 11 | 12 | 13 | 12 | 9  | 12 | 14 |
| 8   | Y | 15 | 18 | 16 | 13 | 15 | 12 | 14 | 14 | 14 | 10 | 10 | 15   | 12 | 12 | 11 | 13 | 13 | 12 | 10 | 14 | 20 |
| N22 | X | 14 | 12 | 15 | 15 | 13 | 14 | 13 | 15 | 10 | 8  | 9  | 13   | 12 | 7  | 11 | 15 | 13 | 12 | 12 | 12 | 17 |
| 9   | Y | 15 | 17 | 16 | 15 | 14 | 15 | 15 | 16 | 13 | 12 | 10 | 14   | 12 | 12 | 11 | 16 | 15 | 14 | 13 | 12 | 17 |
| N23 | X | 14 | 12 | 17 | 13 | 14 | 13 | 13 | 13 | 11 | 8  | 8  | 14   | 11 | 7  | 13 | 14 | 14 | 13 | 12 | 13 | 14 |
| 0   | Y | 16 | 16 | 17 | 14 | 15 | 16 | 14 | 14 | 11 | 12 | 9  | 14.2 | 11 | 12 | 14 | 14 | 17 | 13 | 13 | 14 | 18 |
| N23 | X | 15 | 12 | 16 | 12 | 14 | 13 | 12 | 15 | 10 | 12 | 8  | 14   | 12 | 12 | 11 | 14 | 14 | 12 | 12 | 13 | 14 |
| 1   | Y | 18 | 16 | 17 | 15 | 15 | 14 | 14 | 15 | 12 | 12 | 10 | 14.2 | 12 | 12 | 11 | 15 | 14 | 12 | 12 | 14 | 20 |
| N23 | X | 14 | 12 | 16 | 13 | 13 | 14 | 12 | 13 | 10 | 10 | 8  | 13.2 | 11 | 12 | 11 | 14 | 13 | 12 | 11 | 11 | 18 |
| 2   | Y | 15 | 17 | 16 | 15 | 13 | 14 | 13 | 13 | 12 | 11 | 12 | 14.2 | 14 | 12 | 14 | 14 | 14 | 13 | 11 | 12 | 20 |
| N23 | X | 14 | 17 | 11 | 12 | 13 | 13 | 12 | 14 | 10 | 10 | 9  | 15   | 11 | 7  | 11 | 14 | 13 | 12 | 12 | 11 | 14 |
| 3   | Y | 14 | 18 | 15 | 13 | 14 | 15 | 13 | 16 | 11 | 12 | 9  | 15.2 | 14 | 12 | 12 | 15 | 15 | 13 | 12 | 13 | 17 |
| N23 | X | 14 | 12 | 15 | 14 | 14 | 13 | 13 | 15 | 11 | 12 | 11 | 13   | 12 | 11 | 11 | 15 | 14 | 13 | 9  | 11 | 14 |
| 4   | Y | 16 | 17 | 17 | 14 | 14 | 17 | 13 | 16 | 13 | 12 | 12 | 13   | 12 | 12 | 13 | 15 | 14 | 13 | 13 | 14 | 20 |
| N23 | X | 15 | 17 | 15 | 13 | 14 | 13 | 14 | 13 | 10 | 10 | 8  | 13   | 11 | 8  | 11 | 14 | 14 | 12 | 9  | 11 | 17 |
| 5   | Y | 15 | 17 | 17 | 13 | 14 | 15 | 14 | 15 | 10 | 10 | 12 | 14.2 | 12 | 12 | 13 | 14 | 14 | 13 | 9  | 12 | 18 |
| N23 | X | 14 | 16 | 11 | 13 | 14 | 12 | 13 | 13 | 11 | 11 | 9  | 13   | 11 | 11 | 11 | 13 | 11 | 13 | 10 | 12 | 14 |
| 6   | Y | 14 | 17 | 11 | 16 | 14 | 15 | 14 | 14 | 11 | 13 | 9  | 14   | 11 | 12 | 11 | 13 | 14 | 13 | 10 | 14 | 20 |
| N23 | X | 14 | 12 | 11 | 12 | 14 | 15 | 13 | 15 | 11 | 12 | 10 | 13   | 10 | 12 | 11 | 14 | 13 | 11 | 11 | 12 | 14 |
| 7   | Y | 16 | 16 | 11 | 13 | 15 | 16 | 14 | 15 | 14 | 12 | 10 | 13   | 12 | 12 | 13 | 14 | 14 | 13 | 12 | 12 | 18 |

**Supplementary Table S2. The genotype of 95 Yi individuals living in the Sichuan Yi Autonomous Prefecture, southwest China**

| Num<br>ber | Amelo<br>genin | D6S<br>474 | D12A<br>TA63 | D22S<br>1045 | D10S<br>1248 | D1S1<br>677 | D11S<br>4463 | D1S1<br>627 | D3S4<br>529 | D2S<br>441 | D6S1<br>017 | D4S2<br>408 | D19S<br>433 | D17S<br>1301 | D1GAT<br>A113 | D18S<br>853 | D20S<br>482 | D14S<br>1434 | D9S1<br>122 | D2S1<br>776 | D10S<br>1435 | D5S2<br>500 |
|------------|----------------|------------|--------------|--------------|--------------|-------------|--------------|-------------|-------------|------------|-------------|-------------|-------------|--------------|---------------|-------------|-------------|--------------|-------------|-------------|--------------|-------------|
|            | X              | 14         | 16           | 11           | 15           | 14          | 13           | 14          | 13          | 11         | 8           | 8           | 13          | 12           | 7             | 11          | 13          | 11           | 11          | 11          | 10           | 14          |
| N01        | X              | 17         | 16           | 16           | 20           | 15          | 14           | 14          | 13          | 14         | 13          | 9           | 13.2        | 13           | 7             | 15          | 14          | 14           | 12          | 11          | 14           | 18          |
|            | X              | 13         | 17           | 15           | 17           | 14          | 13           | 14          | 13          | 10         | 10          | 9           | 13          | 12           | 7             | 11          | 14          | 13           | 12          | 9           | 12           | 18          |
| N02        | X              | 14         | 17           | 16           | 19           | 14          | 14           | 14          | 15          | 11.3       | 12          | 9           | 13          | 13           | 7             | 11          | 15          | 14           | 12          | 9           | 14           | 18          |
|            | X              | 14         | 16           | 11           | 15           | 14          | 14           | 11          | 14          | 10         | 10          | 9           | 14          | 13           | 12            | 11          | 15          | 14           | 12          | 12          | 11           | 14          |
| N03        | X              | 14         | 17           | 16           | 17           | 16          | 14           | 13          | 16          | 14         | 12          | 9           | 16.2        | 13           | 13            | 14          | 15          | 15           | 13          | 13          | 13           | 17          |
|            | X              | 14         | 17           | 11           | 15           | 13          | 14           | 13          | 14          | 10         | 8           | 10          | 15.2        | 7            | 12            | 11          | 14          | 11           | 11          | 11          | 11           | 14          |
| N04        | X              | 17         | 18           | 17           | 20           | 14          | 14           | 13          | 15          | 11.3       | 13          | 10          | 15.2        | 14           | 13            | 14          | 14          | 13           | 13          | 11          | 12           | 20          |
|            | X              | 14         | 12           | 15           | 17           | 13          | 14           | 14          | 13          | 12         | 10          | 9           | 14.2        | 11           | 7             | 11          | 14          | 13           | 12          | 12          | 12           | 14          |
| N05        | X              | 15         | 18           | 16           | 19           | 15          | 16           | 14          | 13          | 14         | 12          | 10          | 14.2        | 12           | 11            | 14          | 15          | 14           | 13          | 12          | 13           | 20          |
|            | X              | 16         | 12           | 15           | 17           | 14          | 10           | 11          | 13          | 10         | 10          | 9           | 14          | 11           | 7             | 14          | 13          | 10           | 10          | 13          | 12           | 17          |
| N06        | X              | 16         | 12           | 16           | 17           | 14          | 14           | 11          | 16          | 10         | 10          | 10          | 14          | 14           | 12            | 14          | 14          | 13           | 12          | 13          | 13           | 23          |
|            | X              | 14         | 12           | 15           | 17           | 14          | 15           | 13          | 13          | 11         | 10          | 9           | 15.2        | 11           | 7             | 13          | 13          | 11           | 12          | 12          | 12           | 14          |
| N07        | X              | 14         | 18           | 16           | 20           | 15          | 16           | 14          | 16          | 12         | 13          | 11          | 15.2        | 13           | 7             | 14          | 16          | 11           | 13          | 12          | 12           | 20          |
|            | X              | 14         | 12           | 11           | 15           | 14          | 13           | 13          | 13          | 10         | 8           | 8           | 14          | 9            | 7             | 10          | 14          | 10           | 11          | 10          | 10           | 14          |
| N08        | X              | 15         | 17           | 16           | 17           | 14          | 16           | 13          | 15          | 14         | 10          | 8           | 14          | 11           | 12            | 14          | 15          | 13           | 12          | 12          | 12           | 14          |
|            | X              | 15         | 16           | 15           | 19           | 14          | 14           | 11          | 14          | 10         | 12          | 10          | 13          | 11           | 7             | 11          | 14          | 12           | 12          | 12          | 11           | 14          |
| N09        | X              | 15         | 17           | 17           | 19           | 16          | 16           | 11          | 15          | 11         | 12          | 10          | 13          | 12           | 12            | 12          | 14          | 14           | 13          | 12          | 13           | 14          |
|            | X              | 14         | 17           | 11           | 14           | 14          | 14           | 11          | 14          | 10         | 12          | 8           | 13          | 12           | 7             | 11          | 13          | 11           | 12          | 10          | 11           | 17          |
| N10        | X              | 14         | 18           | 16           | 19           | 15          | 14           | 13          | 15          | 10         | 12          | 11          | 13          | 12           | 11            | 15          | 14          | 14           | 13          | 10          | 12           | 17          |
|            | X              | 14         | 16           | 11           | 15           | 13          | 13           | 13          | 15          | 10         | 8           | 8           | 13          | 11           | 7             | 11          | 13          | 13           | 11          | 11          | 14           | 14          |
| N11        | X              | 16         | 17           | 16           | 18           | 15          | 13           | 14          | 16          | 13         | 11          | 9           | 14          | 11           | 7             | 15          | 16          | 13           | 13          | 12          | 14           | 17          |
|            | X              | 14         | 17           | 11           | 13           | 14          | 14           | 13          | 14          | 8          | 8           | 9           | 15          | 10           | 7             | 12          | 13          | 13           | 12          | 12          | 11           | 14          |
| N12        | X              | 16         | 17           | 11           | 14           | 14          | 16           | 13          | 15          | 12         | 10          | 10          | 16          | 10           | 7             | 15          | 14          | 14           | 13          | 15          | 12           | 20          |
|            | X              | 14         | 12           | 16           | 19           | 15          | 15           | 11          | 14          | 10         | 12          | 8           | 13          | 12           | 12            | 10          | 14          | 14           | 13          | 12          | 11           | 17          |
| N13        | X              | 15         | 17           | 17           | 19           | 15          | 16           | 13          | 15          | 13         | 12          | 10          | 13          | 13           | 13            | 14          | 14          | 16           | 14          | 12          | 11           | 17          |
| N14        | X              | 14         | 12           | 11           | 15           | 14          | 14           | 11          | 13          | 10         | 8           | 8           | 14          | 11           | 7             | 11          | 14          | 14           | 13          | 10          | 12           | 14          |

|     |   |    |    |    |    |    |    |    |    |    |    |    |      |    |    |    |    |    |    |    |    |    |
|-----|---|----|----|----|----|----|----|----|----|----|----|----|------|----|----|----|----|----|----|----|----|----|
|     | X | 15 | 17 | 17 | 19 | 16 | 14 | 14 | 14 | 10 | 12 | 9  | 14   | 12 | 12 | 15 | 14 | 14 | 13 | 11 | 12 | 14 |
|     | X | 15 | 12 | 11 | 17 | 14 | 13 | 12 | 13 | 10 | 12 | 10 | 12   | 12 | 8  | 11 | 10 | 10 | 11 | 10 | 12 | 17 |
| N15 | X | 16 | 17 | 15 | 20 | 14 | 13 | 13 | 17 | 15 | 13 | 11 | 14   | 12 | 12 | 14 | 15 | 13 | 13 | 11 | 15 | 18 |
|     | X | 14 | 17 | 16 | 17 | 15 | 13 | 13 | 13 | 11 | 10 | 9  | 13   | 12 | 7  | 14 | 15 | 13 | 11 | 9  | 13 | 14 |
| N16 | X | 14 | 17 | 17 | 19 | 15 | 15 | 15 | 14 | 14 | 12 | 11 | 13   | 12 | 7  | 14 | 15 | 14 | 12 | 10 | 14 | 18 |
|     | X | 15 | 12 | 11 | 13 | 15 | 12 | 13 | 13 | 10 | 10 | 10 | 13   | 11 | 7  | 11 | 12 | 11 | 12 | 9  | 12 | 17 |
| N17 | X | 16 | 17 | 16 | 17 | 15 | 14 | 14 | 17 | 10 | 10 | 11 | 14.2 | 12 | 11 | 13 | 14 | 14 | 13 | 12 | 13 | 17 |
|     | X | 16 | 17 | 11 | 13 | 14 | 14 | 13 | 14 | 11 | 10 | 9  | 13   | 11 | 7  | 13 | 10 | 11 | 12 | 11 | 11 | 14 |
| N18 | X | 16 | 18 | 15 | 14 | 14 | 14 | 14 | 16 | 14 | 12 | 9  | 16.2 | 14 | 12 | 13 | 14 | 13 | 13 | 11 | 13 | 14 |
|     | X | 15 | 17 | 11 | 15 | 14 | 13 | 13 | 13 | 10 | 8  | 8  | 14   | 11 | 12 | 11 | 14 | 11 | 11 | 9  | 12 | 17 |
| N19 | X | 17 | 18 | 15 | 17 | 15 | 15 | 16 | 17 | 11 | 10 | 10 | 14.2 | 12 | 12 | 14 | 14 | 13 | 13 | 10 | 13 | 17 |
|     | X | 14 | 12 | 11 | 13 | 15 | 15 | 13 | 13 | 11 | 8  | 8  | 14   | 11 | 7  | 11 | 12 | 10 | 13 | 9  | 12 | 14 |
| N20 | X | 15 | 17 | 11 | 15 | 15 | 15 | 14 | 15 | 14 | 12 | 10 | 15   | 11 | 11 | 12 | 12 | 13 | 17 | 10 | 14 | 18 |
|     | X | 14 | 15 | 11 | 17 | 14 | 14 | 13 | 17 | 10 | 10 | 8  | 13   | 11 | 7  | 11 | 14 | 13 | 12 | 11 | 11 | 14 |
| N21 | X | 20 | 17 | 15 | 19 | 15 | 14 | 13 | 17 | 11 | 12 | 9  | 14.2 | 12 | 12 | 13 | 16 | 14 | 13 | 12 | 15 | 14 |
|     | X | 14 | 12 | 11 | 12 | 14 | 15 | 14 | 13 | 11 | 10 | 9  | 13   | 12 | 7  | 13 | 13 | 14 | 12 | 8  | 13 | 14 |
| N22 | X | 16 | 17 | 15 | 17 | 15 | 15 | 14 | 13 | 13 | 12 | 10 | 14   | 14 | 11 | 14 | 15 | 14 | 14 | 10 | 14 | 17 |
|     | X | 14 | 16 | 16 | 15 | 15 | 13 | 13 | 13 | 10 | 8  | 9  | 13   | 11 | 12 | 11 | 13 | 13 | 12 | 11 | 12 | 14 |
| N23 | X | 14 | 17 | 16 | 17 | 16 | 16 | 14 | 14 | 14 | 10 | 10 | 16.2 | 12 | 12 | 14 | 14 | 14 | 13 | 12 | 14 | 18 |
|     | X | 15 | 12 | 11 | 12 | 10 | 16 | 13 | 15 | 10 | 10 | 9  | 13.2 | 12 | 12 | 13 | 14 | 10 | 11 | 11 | 12 | 17 |
| N24 | X | 17 | 17 | 15 | 17 | 16 | 16 | 13 | 16 | 10 | 10 | 10 | 16.2 | 13 | 12 | 14 | 15 | 14 | 12 | 14 | 12 | 20 |
|     | X | 14 | 16 | 11 | 15 | 14 | 14 | 13 | 13 | 10 | 8  | 9  | 13   | 9  | 7  | 11 | 10 | 11 | 13 | 12 | 12 | 14 |
| N25 | X | 15 | 17 | 17 | 17 | 14 | 15 | 14 | 16 | 10 | 10 | 10 | 14.2 | 11 | 11 | 13 | 16 | 14 | 13 | 12 | 13 | 18 |
|     | X | 17 | 12 | 11 | 14 | 14 | 14 | 13 | 13 | 11 | 10 | 9  | 13   | 9  | 7  | 14 | 15 | 13 | 10 | 10 | 13 | 17 |
| N26 | X | 17 | 16 | 19 | 15 | 15 | 15 | 14 | 14 | 12 | 10 | 11 | 13   | 11 | 11 | 14 | 15 | 14 | 12 | 12 | 14 | 20 |
|     | X | 14 | 16 | 11 | 17 | 14 | 13 | 13 | 15 | 10 | 10 | 10 | 14.2 | 11 | 11 | 10 | 14 | 11 | 12 | 12 | 12 | 14 |
| N27 | X | 14 | 17 | 15 | 17 | 15 | 15 | 15 | 15 | 10 | 10 | 11 | 16   | 12 | 11 | 11 | 14 | 14 | 13 | 12 | 13 | 18 |
|     | X | 14 | 12 | 11 | 13 | 14 | 13 | 12 | 13 | 9  | 10 | 9  | 14   | 9  | 12 | 10 | 10 | 10 | 13 | 10 | 11 | 17 |
| N28 | X | 17 | 16 | 15 | 17 | 14 | 15 | 14 | 15 | 14 | 10 | 10 | 15.2 | 12 | 13 | 15 | 11 | 14 | 13 | 12 | 11 | 20 |
|     | X | 14 | 12 | 17 | 13 | 14 | 13 | 12 | 13 | 12 | 8  | 9  | 13   | 11 | 11 | 13 | 13 | 14 | 13 | 11 | 11 | 14 |
| N29 | X | 17 | 12 | 17 | 15 | 15 | 16 | 13 | 16 | 13 | 10 | 10 | 15.2 | 12 | 12 | 13 | 14 | 14 | 13 | 12 | 13 | 17 |

|     |   |    |    |    |    |    |    |    |    |      |    |    |      |    |    |    |    |    |    |    |    |    |
|-----|---|----|----|----|----|----|----|----|----|------|----|----|------|----|----|----|----|----|----|----|----|----|
|     | X | 14 | 12 | 11 | 13 | 14 | 13 | 13 | 13 | 11   | 10 | 9  | 15   | 12 | 7  | 12 | 10 | 12 | 12 | 9  | 11 | 17 |
| N30 | X | 17 | 16 | 11 | 14 | 15 | 15 | 15 | 15 | 14   | 12 | 11 | 15.2 | 13 | 12 | 13 | 13 | 13 | 12 | 13 | 12 | 18 |
|     | X | 14 | 16 | 15 | 15 | 12 | 14 | 13 | 13 | 13   | 8  | 8  | 13   | 11 | 11 | 11 | 12 | 11 | 10 | 10 | 12 | 17 |
| N31 | X | 16 | 17 | 17 | 17 | 15 | 14 | 13 | 16 | 14   | 10 | 9  | 14   | 12 | 12 | 11 | 14 | 14 | 13 | 12 | 12 | 18 |
|     | X | 14 | 15 | 17 | 15 | 14 | 14 | 13 | 14 | 11   | 8  | 9  | 14.2 | 12 | 7  | 11 | 14 | 10 | 10 | 14 | 11 | 17 |
| N32 | X | 16 | 16 | 17 | 19 | 16 | 16 | 14 | 16 | 11   | 12 | 12 | 15   | 13 | 11 | 11 | 14 | 14 | 13 | 14 | 14 | 20 |
|     | X | 15 | 16 | 11 | 15 | 14 | 12 | 12 | 14 | 11   | 8  | 9  | 12   | 12 | 7  | 11 | 12 | 14 | 12 | 11 | 12 | 14 |
| N33 | X | 15 | 17 | 17 | 20 | 14 | 13 | 13 | 16 | 11   | 13 | 9  | 15   | 12 | 12 | 11 | 13 | 14 | 13 | 11 | 14 | 17 |
|     | X | 15 | 16 | 11 | 14 | 14 | 14 | 13 | 15 | 12   | 10 | 10 | 13   | 10 | 12 | 11 | 14 | 11 | 11 | 11 | 12 | 14 |
| N34 | X | 15 | 18 | 17 | 15 | 14 | 16 | 13 | 16 | 12   | 10 | 10 | 15   | 12 | 12 | 14 | 15 | 14 | 11 | 12 | 13 | 20 |
|     | X | 14 | 12 | 11 | 13 | 15 | 14 | 13 | 14 | 11   | 8  | 8  | 13   | 11 | 7  | 12 | 14 | 11 | 11 | 11 | 12 | 17 |
| N35 | X | 15 | 12 | 16 | 13 | 15 | 15 | 14 | 15 | 12   | 12 | 8  | 16   | 12 | 12 | 13 | 15 | 13 | 13 | 12 | 13 | 18 |
|     | X | 14 | 12 | 17 | 13 | 14 | 14 | 12 | 14 | 10   | 8  | 9  | 13   | 12 | 7  | 11 | 12 | 14 | 13 | 12 | 12 | 17 |
| N36 | X | 17 | 17 | 17 | 17 | 14 | 14 | 13 | 14 | 10   | 10 | 9  | 14   | 13 | 7  | 13 | 14 | 14 | 13 | 13 | 13 | 18 |
|     | X | 15 | 12 | 11 | 11 | 14 | 15 | 12 | 14 | 11.3 | 10 | 9  | 13   | 11 | 7  | 11 | 13 | 13 | 12 | 11 | 11 | 14 |
| N37 | X | 15 | 16 | 17 | 15 | 14 | 16 | 14 | 15 | 12   | 12 | 10 | 14.2 | 13 | 11 | 11 | 14 | 14 | 12 | 11 | 13 | 18 |
|     | X | 14 | 17 | 15 | 13 | 14 | 14 | 13 | 15 | 11   | 10 | 9  | 15   | 11 | 7  | 13 | 13 | 13 | 11 | 11 | 11 | 17 |
| N38 | X | 15 | 17 | 17 | 15 | 14 | 15 | 14 | 15 | 12   | 13 | 10 | 15.2 | 12 | 7  | 14 | 15 | 14 | 12 | 12 | 12 | 18 |
|     | X | 14 | 12 | 11 | 11 | 14 | 14 | 15 | 15 | 10   | 8  | 9  | 13   | 10 | 7  | 11 | 11 | 13 | 12 | 11 | 12 | 14 |
| N39 | X | 15 | 16 | 11 | 13 | 16 | 14 | 15 | 16 | 15   | 12 | 9  | 14   | 12 | 7  | 11 | 14 | 14 | 13 | 12 | 13 | 17 |
|     | X | 15 | 12 | 16 | 13 | 15 | 16 | 13 | 13 | 12   | 10 | 10 | 14   | 11 | 7  | 13 | 14 | 14 | 13 | 10 | 11 | 14 |
| N40 | X | 16 | 16 | 17 | 15 | 15 | 17 | 14 | 15 | 15   | 13 | 11 | 16   | 12 | 12 | 13 | 15 | 14 | 13 | 11 | 14 | 18 |
|     | X | 14 | 12 | 15 | 13 | 14 | 14 | 11 | 13 | 11.3 | 8  | 9  | 14   | 11 | 11 | 12 | 13 | 14 | 12 | 10 | 11 | 20 |
| N41 | Y | 14 | 17 | 16 | 15 | 15 | 17 | 13 | 14 | 14   | 12 | 10 | 14.2 | 13 | 12 | 13 | 14 | 14 | 12 | 11 | 12 | 20 |
|     | X | 15 | 17 | 11 | 13 | 13 | 14 | 13 | 13 | 10   | 8  | 9  | 14   | 7  | 12 | 11 | 15 | 11 | 10 | 12 | 12 | 14 |
| N42 | Y | 15 | 18 | 15 | 14 | 14 | 14 | 14 | 15 | 10   | 12 | 11 | 15   | 13 | 13 | 14 | 16 | 11 | 15 | 12 | 13 | 14 |
|     | X | 14 | 12 | 15 | 13 | 15 | 13 | 12 | 15 | 10   | 10 | 9  | 9    | 10 | 7  | 11 | 15 | 11 | 12 | 11 | 11 | 14 |
| N43 | Y | 15 | 12 | 17 | 13 | 15 | 13 | 13 | 15 | 11   | 12 | 11 | 13   | 12 | 11 | 12 | 15 | 13 | 13 | 12 | 11 | 17 |
|     | X | 16 | 16 | 11 | 13 | 14 | 14 | 13 | 13 | 11   | 8  | 10 | 13.2 | 10 | 7  | 14 | 14 | 14 | 13 | 11 | 11 | 18 |
| N44 | Y | 17 | 17 | 11 | 15 | 16 | 15 | 13 | 16 | 12   | 12 | 10 | 15.2 | 10 | 12 | 15 | 15 | 14 | 16 | 12 | 14 | 18 |
| N45 | X | 15 | 17 | 11 | 13 | 15 | 14 | 13 | 13 | 10   | 12 | 9  | 13   | 12 | 7  | 11 | 13 | 14 | 12 | 11 | 13 | 14 |



|     |   |    |    |    |    |    |    |    |    |    |    |    |      |    |    |    |    |    |    |    |    |    |
|-----|---|----|----|----|----|----|----|----|----|----|----|----|------|----|----|----|----|----|----|----|----|----|
|     | Y | 16 | 18 | 16 | 13 | 15 | 15 | 14 | 15 | 13 | 12 | 10 | 16   | 13 | 7  | 13 | 15 | 15 | 13 | 13 | 13 | 17 |
|     | X | 15 | 17 | 15 | 13 | 14 | 14 | 13 | 15 | 10 | 11 | 10 | 13   | 12 | 7  | 11 | 14 | 13 | 12 | 12 | 13 | 14 |
| N46 | Y | 16 | 18 | 16 | 14 | 14 | 14 | 14 | 15 | 14 | 12 | 10 | 14   | 13 | 13 | 11 | 15 | 14 | 12 | 13 | 13 | 14 |
|     | X | 14 | 12 | 17 | 13 | 14 | 15 | 12 | 13 | 11 | 10 | 8  | 14   | 11 | 7  | 11 | 13 | 14 | 13 | 12 | 12 | 18 |
| N47 | Y | 15 | 17 | 17 | 14 | 15 | 16 | 15 | 14 | 15 | 10 | 10 | 15   | 12 | 11 | 14 | 14 | 14 | 13 | 12 | 13 | 20 |
|     | X | 14 | 16 | 11 | 13 | 14 | 15 | 13 | 13 | 10 | 10 | 8  | 13   | 11 | 7  | 10 | 14 | 14 | 13 | 10 | 11 | 14 |
| N48 | Y | 15 | 17 | 17 | 15 | 17 | 16 | 13 | 16 | 10 | 13 | 9  | 15   | 12 | 12 | 11 | 14 | 14 | 13 | 11 | 13 | 18 |
|     | X | 14 | 12 | 11 | 13 | 14 | 14 | 10 | 14 | 11 | 10 | 9  | 13   | 9  | 7  | 11 | 13 | 13 | 12 | 11 | 12 | 17 |
| N49 | Y | 15 | 17 | 16 | 13 | 15 | 14 | 12 | 15 | 11 | 11 | 9  | 14   | 10 | 7  | 13 | 13 | 14 | 13 | 12 | 13 | 18 |
|     | X | 14 | 17 | 15 | 13 | 13 | 14 | 13 | 15 | 10 | 10 | 8  | 12   | 11 | 7  | 11 | 13 | 13 | 12 | 9  | 12 | 14 |
| N50 | Y | 17 | 18 | 15 | 14 | 15 | 15 | 15 | 15 | 10 | 13 | 11 | 14   | 11 | 12 | 11 | 14 | 14 | 13 | 12 | 16 | 14 |
|     | X | 14 | 12 | 15 | 13 | 14 | 14 | 13 | 13 | 10 | 10 | 8  | 13   | 12 | 7  | 11 | 14 | 13 | 12 | 11 | 11 | 18 |
| N51 | Y | 17 | 12 | 16 | 13 | 16 | 17 | 13 | 15 | 11 | 12 | 10 | 14.2 | 13 | 11 | 12 | 14 | 14 | 12 | 12 | 12 | 20 |
|     | X | 14 | 14 | 14 | 13 | 14 | 13 | 14 | 14 | 11 | 10 | 9  | 12   | 11 | 7  | 11 | 10 | 13 | 13 | 11 | 12 | 17 |
| N52 | Y | 16 | 17 | 16 | 13 | 15 | 13 | 14 | 16 | 13 | 12 | 10 | 14   | 11 | 11 | 14 | 14 | 14 | 13 | 13 | 13 | 18 |
|     | X | 14 | 12 | 15 | 13 | 14 | 13 | 13 | 14 | 11 | 10 | 9  | 14.2 | 10 | 11 | 11 | 14 | 13 | 12 | 11 | 12 | 14 |
| N53 | Y | 15 | 12 | 16 | 13 | 15 | 16 | 14 | 15 | 13 | 12 | 10 | 16.2 | 12 | 12 | 11 | 15 | 14 | 13 | 13 | 12 | 18 |
|     | X | 14 | 12 | 11 | 12 | 13 | 13 | 13 | 14 | 11 | 8  | 8  | 14   | 13 | 7  | 11 | 14 | 13 | 11 | 11 | 12 | 14 |
| N54 | Y | 15 | 12 | 16 | 13 | 13 | 16 | 14 | 14 | 14 | 12 | 8  | 15.2 | 13 | 11 | 13 | 16 | 14 | 12 | 12 | 12 | 17 |
|     | X | 14 | 17 | 11 | 12 | 12 | 13 | 13 | 13 | 12 | 10 | 10 | 13   | 10 | 7  | 11 | 14 | 14 | 11 | 12 | 11 | 14 |
| N55 | Y | 15 | 18 | 16 | 13 | 14 | 13 | 14 | 16 | 14 | 12 | 11 | 15.2 | 12 | 12 | 13 | 14 | 14 | 13 | 12 | 13 | 14 |
|     | X | 14 | 14 | 17 | 14 | 15 | 15 | 12 | 13 | 10 | 10 | 10 | 13   | 11 | 12 | 11 | 14 | 11 | 10 | 10 | 11 | 14 |
| N56 | Y | 14 | 18 | 17 | 15 | 15 | 16 | 13 | 15 | 10 | 12 | 10 | 13.2 | 12 | 13 | 11 | 15 | 13 | 13 | 11 | 11 | 17 |
|     | X | 16 | 14 | 14 | 13 | 14 | 15 | 13 | 13 | 10 | 10 | 9  | 14   | 12 | 11 | 11 | 13 | 10 | 13 | 12 | 11 | 14 |
| N57 | Y | 18 | 17 | 15 | 14 | 14 | 16 | 13 | 13 | 11 | 12 | 10 | 16.2 | 12 | 12 | 14 | 14 | 15 | 13 | 12 | 15 | 18 |
|     | X | 15 | 12 | 11 | 15 | 15 | 14 | 13 | 16 | 11 | 12 | 9  | 13   | 11 | 7  | 13 | 14 | 10 | 13 | 9  | 11 | 17 |
| N58 | Y | 16 | 16 | 17 | 15 | 16 | 16 | 15 | 17 | 14 | 12 | 10 | 15   | 12 | 7  | 14 | 15 | 11 | 14 | 14 | 14 | 17 |
|     | X | 14 | 12 | 11 | 14 | 14 | 15 | 14 | 14 | 10 | 8  | 10 | 13   | 11 | 7  | 12 | 13 | 13 | 13 | 9  | 12 | 14 |
| N59 | Y | 15 | 12 | 16 | 14 | 15 | 15 | 14 | 16 | 10 | 10 | 11 | 14   | 11 | 11 | 13 | 16 | 14 | 17 | 10 | 13 | 18 |
|     | X | 14 | 15 | 11 | 14 | 15 | 9  | 12 | 15 | 11 | 8  | 10 | 13   | 12 | 7  | 12 | 13 | 11 | 11 | 12 | 13 | 16 |
| N60 | Y | 14 | 17 | 17 | 15 | 16 | 15 | 13 | 15 | 12 | 13 | 10 | 13   | 12 | 11 | 15 | 14 | 14 | 12 | 12 | 14 | 18 |

|     |   |    |    |    |    |    |    |    |    |      |    |    |      |    |    |    |    |    |    |    |    |    |
|-----|---|----|----|----|----|----|----|----|----|------|----|----|------|----|----|----|----|----|----|----|----|----|
|     | X | 16 | 12 | 16 | 13 | 14 | 13 | 12 | 13 | 10   | 11 | 10 | 14   | 12 | 7  | 11 | 14 | 10 | 10 | 11 | 13 | 14 |
| N61 | Y | 17 | 12 | 16 | 13 | 15 | 13 | 14 | 15 | 14   | 13 | 10 | 15.2 | 12 | 11 | 15 | 15 | 14 | 13 | 12 | 14 | 17 |
|     | X | 15 | 16 | 11 | 14 | 14 | 13 | 10 | 15 | 11.3 | 10 | 8  | 13   | 12 | 7  | 13 | 13 | 14 | 10 | 12 | 13 | 14 |
| N62 | Y | 17 | 18 | 15 | 14 | 16 | 15 | 14 | 16 | 14   | 10 | 9  | 16.2 | 12 | 12 | 14 | 14 | 14 | 13 | 12 | 14 | 17 |
|     | X | 14 | 12 | 11 | 13 | 14 | 13 | 13 | 14 | 10   | 10 | 9  | 14   | 13 | 7  | 11 | 13 | 11 | 12 | 11 | 13 | 18 |
| N63 | Y | 14 | 16 | 16 | 13 | 15 | 14 | 14 | 15 | 14   | 10 | 10 | 14   | 13 | 7  | 12 | 13 | 13 | 13 | 11 | 14 | 20 |
|     | X | 15 | 12 | 11 | 13 | 14 | 15 | 13 | 15 | 11   | 8  | 9  | 13   | 7  | 7  | 11 | 10 | 14 | 10 | 8  | 12 | 14 |
| N64 | Y | 16 | 17 | 17 | 13 | 14 | 16 | 13 | 16 | 12   | 12 | 9  | 14   | 11 | 12 | 13 | 13 | 14 | 12 | 12 | 12 | 17 |
|     | X | 14 | 12 | 15 | 14 | 15 | 13 | 13 | 14 | 11   | 13 | 10 | 13   | 9  | 7  | 11 | 13 | 13 | 10 | 12 | 12 | 17 |
| N65 | Y | 15 | 16 | 15 | 16 | 17 | 15 | 14 | 14 | 11.3 | 13 | 10 | 15.2 | 10 | 12 | 11 | 14 | 13 | 12 | 12 | 14 | 20 |
|     | X | 15 | 12 | 11 | 14 | 14 | 13 | 13 | 14 | 11   | 11 | 8  | 13   | 10 | 7  | 11 | 13 | 14 | 10 | 9  | 11 | 14 |
| N66 | Y | 17 | 16 | 11 | 16 | 14 | 14 | 14 | 15 | 12   | 12 | 10 | 13   | 12 | 11 | 11 | 14 | 14 | 17 | 10 | 12 | 20 |
|     | X | 14 | 12 | 15 | 13 | 14 | 14 | 12 | 14 | 11.3 | 8  | 8  | 13   | 12 | 11 | 11 | 14 | 14 | 12 | 12 | 12 | 14 |
| N67 | Y | 15 | 16 | 16 | 13 | 14 | 15 | 13 | 15 | 14   | 10 | 11 | 14.2 | 13 | 12 | 14 | 14 | 14 | 13 | 13 | 13 | 18 |
|     | X | 14 | 12 | 11 | 12 | 14 | 13 | 13 | 13 | 11   | 8  | 8  | 14   | 12 | 7  | 13 | 14 | 13 | 13 | 9  | 13 | 18 |
| N68 | Y | 17 | 14 | 11 | 15 | 14 | 13 | 13 | 13 | 12   | 10 | 12 | 14   | 14 | 12 | 13 | 15 | 13 | 13 | 11 | 14 | 18 |
|     | X | 15 | 12 | 11 | 14 | 13 | 15 | 13 | 13 | 10   | 11 | 10 | 13   | 9  | 11 | 11 | 13 | 11 | 12 | 12 | 12 | 14 |
| N69 | Y | 16 | 17 | 15 | 15 | 14 | 17 | 13 | 16 | 11   | 12 | 10 | 13   | 13 | 11 | 13 | 14 | 14 | 13 | 13 | 13 | 17 |
|     | X | 14 | 17 | 17 | 13 | 14 | 14 | 13 | 14 | 12   | 8  | 8  | 14.2 | 11 | 7  | 11 | 14 | 14 | 12 | 9  | 11 | 17 |
| N70 | Y | 15 | 18 | 17 | 15 | 14 | 15 | 15 | 14 | 14   | 10 | 9  | 14.2 | 12 | 11 | 13 | 15 | 14 | 17 | 12 | 12 | 17 |
|     | X | 14 | 16 | 11 | 14 | 14 | 13 | 12 | 13 | 11   | 8  | 8  | 13   | 11 | 11 | 11 | 13 | 13 | 11 | 11 | 13 | 14 |
| N71 | Y | 15 | 17 | 15 | 14 | 15 | 15 | 13 | 16 | 11   | 8  | 10 | 14   | 12 | 12 | 11 | 13 | 14 | 12 | 13 | 13 | 18 |
|     | X | 14 | 16 | 11 | 13 | 15 | 14 | 13 | 13 | 11   | 10 | 8  | 14   | 9  | 7  | 14 | 15 | 14 | 12 | 9  | 12 | 14 |
| N72 | Y | 15 | 17 | 16 | 14 | 16 | 16 | 13 | 16 | 14   | 13 | 10 | 14   | 12 | 11 | 15 | 16 | 14 | 13 | 12 | 12 | 17 |
|     | X | 14 | 16 | 11 | 15 | 14 | 15 | 13 | 13 | 11   | 8  | 8  | 14   | 12 | 7  | 11 | 14 | 10 | 13 | 10 | 10 | 14 |
| N73 | Y | 15 | 17 | 16 | 17 | 14 | 16 | 14 | 15 | 13   | 10 | 11 | 16.2 | 13 | 7  | 15 | 14 | 12 | 13 | 13 | 12 | 20 |
|     | X | 14 | 17 | 15 | 13 | 14 | 13 | 13 | 13 | 11   | 8  | 9  | 13   | 12 | 11 | 11 | 14 | 11 | 11 | 10 | 12 | 14 |
| N74 | Y | 15 | 18 | 16 | 13 | 15 | 16 | 14 | 15 | 14   | 12 | 10 | 15   | 12 | 11 | 13 | 16 | 13 | 15 | 12 | 14 | 20 |
|     | X | 14 | 12 | 11 | 13 | 14 | 15 | 14 | 16 | 11   | 8  | 10 | 14.2 | 11 | 7  | 11 | 14 | 14 | 13 | 10 | 12 | 17 |
| N75 | Y | 14 | 18 | 16 | 13 | 15 | 17 | 14 | 17 | 14   | 8  | 10 | 15.2 | 12 | 11 | 12 | 14 | 14 | 13 | 13 | 13 | 17 |
| N76 | X | 15 | 12 | 11 | 13 | 14 | 14 | 10 | 14 | 11   | 10 | 9  | 14   | 10 | 7  | 12 | 13 | 14 | 12 | 9  | 12 | 14 |

|     |   |    |    |    |    |    |    |    |    |      |    |    |      |    |    |    |    |    |    |    |    |    |
|-----|---|----|----|----|----|----|----|----|----|------|----|----|------|----|----|----|----|----|----|----|----|----|
|     | Y | 16 | 14 | 17 | 15 | 15 | 15 | 14 | 15 | 11   | 12 | 10 | 15   | 12 | 7  | 14 | 14 | 14 | 13 | 12 | 13 | 18 |
|     | X | 14 | 16 | 16 | 13 | 14 | 13 | 13 | 14 | 11   | 12 | 8  | 14   | 12 | 11 | 11 | 14 | 14 | 12 | 11 | 12 | 14 |
| N77 | Y | 17 | 17 | 17 | 14 | 14 | 14 | 14 | 14 | 12   | 13 | 9  | 14   | 12 | 12 | 11 | 14 | 14 | 13 | 12 | 13 | 17 |
|     | X | 14 | 12 | 11 | 13 | 14 | 15 | 10 | 14 | 10   | 8  | 8  | 13   | 12 | 7  | 14 | 13 | 13 | 10 | 11 | 11 | 18 |
| N78 | Y | 14 | 12 | 16 | 14 | 16 | 16 | 13 | 15 | 11   | 12 | 10 | 14   | 12 | 12 | 15 | 14 | 13 | 13 | 13 | 12 | 18 |
|     | X | 14 | 17 | 17 | 17 | 14 | 13 | 11 | 14 | 11.3 | 10 | 10 | 15   | 11 | 7  | 11 | 15 | 14 | 11 | 10 | 11 | 14 |
| N79 | Y | 14 | 18 | 17 | 19 | 14 | 14 | 13 | 15 | 11.3 | 12 | 11 | 16.2 | 14 | 7  | 14 | 16 | 14 | 13 | 10 | 13 | 18 |
|     | X | 14 | 16 | 11 | 17 | 14 | 13 | 13 | 15 | 10   | 10 | 11 | 14   | 12 | 7  | 11 | 14 | 10 | 11 | 11 | 12 | 14 |
| N80 | Y | 18 | 17 | 16 | 19 | 14 | 15 | 13 | 15 | 11   | 12 | 12 | 16.2 | 13 | 11 | 14 | 15 | 14 | 14 | 11 | 13 | 20 |
|     | X | 15 | 12 | 11 | 17 | 15 | 14 | 11 | 13 | 10   | 10 | 10 | 13   | 12 | 7  | 11 | 13 | 14 | 12 | 11 | 12 | 17 |
| N81 | Y | 17 | 16 | 17 | 19 | 16 | 17 | 11 | 14 | 11.3 | 12 | 10 | 13.2 | 13 | 12 | 13 | 14 | 14 | 12 | 11 | 14 | 17 |
|     | X | 14 | 16 | 15 | 15 | 14 | 13 | 12 | 15 | 11   | 8  | 8  | 13   | 12 | 7  | 11 | 14 | 11 | 12 | 14 | 12 | 17 |
| N82 | Y | 16 | 18 | 17 | 17 | 15 | 14 | 12 | 15 | 11   | 10 | 12 | 13   | 13 | 11 | 14 | 14 | 14 | 13 | 14 | 13 | 18 |
|     | X | 14 | 12 | 11 | 15 | 14 | 14 | 11 | 14 | 11   | 8  | 8  | 15.2 | 9  | 7  | 11 | 14 | 11 | 12 | 10 | 12 | 18 |
| N83 | Y | 15 | 16 | 16 | 20 | 15 | 15 | 13 | 16 | 11   | 13 | 10 | 16.2 | 10 | 7  | 12 | 15 | 13 | 12 | 14 | 12 | 18 |
|     | X | 15 | 12 | 16 | 17 | 16 | 14 | 13 | 13 | 11   | 10 | 11 | 12   | 12 | 12 | 11 | 13 | 14 | 12 | 12 | 13 | 14 |
| N84 | Y | 15 | 19 | 17 | 19 | 16 | 14 | 14 | 14 | 12   | 12 | 11 | 16.2 | 12 | 12 | 14 | 16 | 14 | 13 | 14 | 13 | 17 |
|     | X | 14 | 12 | 11 | 16 | 14 | 13 | 13 | 13 | 11   | 10 | 9  | 13   | 12 | 7  | 11 | 14 | 12 | 13 | 10 | 14 | 14 |
| N85 | Y | 16 | 16 | 16 | 17 | 14 | 14 | 14 | 13 | 14   | 10 | 10 | 16   | 13 | 12 | 14 | 15 | 13 | 13 | 11 | 14 | 20 |
|     | X | 14 | 17 | 15 | 14 | 14 | 12 | 11 | 14 | 10   | 12 | 8  | 14.2 | 10 | 7  | 11 | 14 | 14 | 13 | 10 | 13 | 18 |
| N86 | Y | 14 | 18 | 16 | 19 | 14 | 14 | 13 | 16 | 14   | 13 | 9  | 16.2 | 12 | 7  | 12 | 14 | 14 | 16 | 12 | 14 | 18 |
|     | X | 15 | 16 | 17 | 15 | 14 | 10 | 11 | 13 | 11   | 8  | 8  | 13   | 12 | 11 | 11 | 14 | 11 | 11 | 10 | 10 | 14 |
| N87 | Y | 17 | 17 | 17 | 19 | 15 | 16 | 13 | 14 | 12   | 12 | 9  | 14   | 13 | 12 | 15 | 14 | 14 | 12 | 11 | 12 | 14 |
|     | X | 14 | 17 | 17 | 19 | 14 | 13 | 12 | 13 | 10   | 12 | 8  | 14   | 12 | 12 | 11 | 15 | 13 | 12 | 10 | 11 | 14 |
| N88 | Y | 17 | 17 | 17 | 19 | 14 | 14 | 13 | 16 | 10   | 12 | 10 | 14   | 13 | 12 | 14 | 16 | 14 | 13 | 10 | 13 | 17 |
|     | X | 14 | 12 | 11 | 17 | 10 | 13 | 11 | 14 | 10   | 10 | 10 | 14   | 11 | 7  | 13 | 15 | 11 | 11 | 14 | 11 | 14 |
| N89 | Y | 17 | 17 | 16 | 17 | 14 | 15 | 14 | 14 | 14   | 10 | 11 | 14.2 | 13 | 12 | 14 | 15 | 12 | 13 | 14 | 12 | 14 |
|     | X | 14 | 12 | 11 | 15 | 13 | 12 | 11 | 14 | 11   | 12 | 8  | 15.2 | 11 | 7  | 11 | 14 | 14 | 12 | 11 | 14 | 14 |
| N90 | Y | 14 | 16 | 17 | 19 | 15 | 16 | 14 | 15 | 12   | 12 | 10 | 15.2 | 12 | 12 | 11 | 14 | 14 | 13 | 11 | 14 | 18 |
|     | X | 14 | 12 | 16 | 15 | 14 | 16 | 13 | 15 | 10   | 8  | 10 | 14.2 | 10 | 7  | 14 | 13 | 14 | 11 | 12 | 11 | 17 |
| N91 | Y | 15 | 12 | 17 | 19 | 15 | 16 | 13 | 16 | 14   | 12 | 10 | 14.2 | 11 | 12 | 15 | 14 | 14 | 11 | 12 | 14 | 17 |

---

|     |   |    |    |    |    |    |    |    |    |    |    |    |      |    |    |    |    |    |    |    |    |    |
|-----|---|----|----|----|----|----|----|----|----|----|----|----|------|----|----|----|----|----|----|----|----|----|
|     | X | 14 | 17 | 11 | 18 | 14 | 14 | 13 | 13 | 11 | 11 | 8  | 15.2 | 9  | 7  | 11 | 15 | 14 | 12 | 12 | 12 | 14 |
| N92 | Y | 14 | 18 | 17 | 19 | 15 | 14 | 13 | 15 | 11 | 12 | 9  | 16.2 | 13 | 12 | 14 | 16 | 14 | 13 | 14 | 13 | 14 |
|     | X | 13 | 16 | 17 | 15 | 13 | 13 | 13 | 13 | 9  | 8  | 9  | 13   | 12 | 7  | 15 | 14 | 13 | 12 | 11 | 11 | 17 |
| N93 | Y | 14 | 17 | 17 | 19 | 15 | 15 | 13 | 15 | 10 | 12 | 10 | 13   | 12 | 11 | 16 | 14 | 14 | 13 | 11 | 12 | 18 |
|     | X | 14 | 16 | 15 | 17 | 15 | 13 | 11 | 14 | 11 | 10 | 10 | 13   | 11 | 7  | 11 | 12 | 11 | 13 | 9  | 12 | 17 |
| N94 | Y | 15 | 17 | 17 | 20 | 15 | 15 | 13 | 15 | 14 | 13 | 10 | 15.2 | 13 | 12 | 15 | 16 | 13 | 13 | 10 | 13 | 17 |
|     | X | 14 | 12 | 11 | 17 | 15 | 13 | 13 | 16 | 10 | 10 | 10 | 13   | 10 | 7  | 11 | 13 | 13 | 12 | 11 | 11 | 14 |
| N95 | Y | 16 | 12 | 18 | 19 | 15 | 16 | 13 | 16 | 11 | 12 | 11 | 13   | 12 | 7  | 15 | 15 | 13 | 12 | 14 | 13 | 18 |

---

**Supplementary Table S3.** The p value of the pairwise linkage disequilibrium in all pairs of 21 Non-CODIS STR loci in the Sichuan Tibetan population

| Loci           | [01]   | [02]   | [03]   | [04]   | [05]   | [06]   | [07]   | [08]   | [09]   | [10]   | [11]   | [12]   | [13]   | [14]   | [15]   | [16]   | [17]   | [18]   | [19]   | [20]   | [21] |
|----------------|--------|--------|--------|--------|--------|--------|--------|--------|--------|--------|--------|--------|--------|--------|--------|--------|--------|--------|--------|--------|------|
| [01] D6S474    |        |        |        |        |        |        |        |        |        |        |        |        |        |        |        |        |        |        |        |        |      |
| [02] D12ATA63  | 0.0182 |        |        |        |        |        |        |        |        |        |        |        |        |        |        |        |        |        |        |        |      |
| [03] D22S1045  | 0.3029 | 0.0878 |        |        |        |        |        |        |        |        |        |        |        |        |        |        |        |        |        |        |      |
| [04] D10S1248  | 0.0226 | 0.0294 | 0.1241 |        |        |        |        |        |        |        |        |        |        |        |        |        |        |        |        |        |      |
| [05] D1S1677   | 0.1019 | 0.2101 | 0.2043 | 0.0034 |        |        |        |        |        |        |        |        |        |        |        |        |        |        |        |        |      |
| [06] D11S4463  | 0.1732 | 0.1381 | 0.0365 | 0.1618 | 0.0020 |        |        |        |        |        |        |        |        |        |        |        |        |        |        |        |      |
| [07] D1S1627   | 0.0724 | 0.0345 | 0.0321 | 0.0018 | 0.0010 | 0.0910 |        |        |        |        |        |        |        |        |        |        |        |        |        |        |      |
| [08] D3S4529   | 0.6761 | 0.6056 | 0.1536 | 0.0252 | 0.0025 | 0.0085 | 0.2966 |        |        |        |        |        |        |        |        |        |        |        |        |        |      |
| [09] D2S441    | 0.4742 | 0.1301 | 0.2930 | 0.0053 | 0.0245 | 0.3604 | 0.0033 | 0.0288 |        |        |        |        |        |        |        |        |        |        |        |        |      |
| [10] D6S1017   | 0.1674 | 0.0523 | 0.0642 | 0.1986 | 0.0321 | 0.0014 | 0.1755 | 0.0405 | 0.0574 |        |        |        |        |        |        |        |        |        |        |        |      |
| [11] D4S2408   | 0.3619 | 0.1864 | 0.0044 | 0.1712 | 0.1516 | 0.1063 | 0.1807 | 0.1441 | 0.0092 | 0.1174 |        |        |        |        |        |        |        |        |        |        |      |
| [12] D19S433   | 0.3447 | 0.0018 | 0.0396 | 0.0082 | 0.0284 | 0.0323 | 0.0593 | 0.2154 | 0.6203 | 0.0223 | 0.3699 |        |        |        |        |        |        |        |        |        |      |
| [13] D17S1301  | 0.5119 | 0.1428 | 0.0729 | 0.0391 | 0.0630 | 0.0297 | 0.0027 | 0.3908 | 0.2374 | 0.1376 | 0.2073 | 0.0422 |        |        |        |        |        |        |        |        |      |
| [14] D1GATA113 | 0.0066 | 0.6771 | 0.1683 | 0.0102 | 0.0937 | 0.1943 | 0.1915 | 0.3585 | 0.0101 | 0.1204 | 0.0626 | 0.5743 | 0.0806 |        |        |        |        |        |        |        |      |
| [15] D18S853   | 0.1169 | 0.0967 | 0.1489 | 0.2014 | 0.0227 | 0.3732 | 0.0198 | 0.2978 | 0.1791 | 0.2364 | 0.4072 | 0.8099 | 0.1045 | 0.2547 |        |        |        |        |        |        |      |
| [16] D20S482   | 0.3750 | 0.6517 | 0.2692 | 0.0635 | 0.0207 | 0.1020 | 0.1058 | 0.0007 | 0.1416 | 0.2403 | 0.1416 | 0.3505 | 0.0259 | 0.1625 | 0.5313 |        |        |        |        |        |      |
| [17] D14S1434  | 0.0847 | 0.0805 | 0.1055 | 0.0093 | 0.1259 | 0.1168 | 0.0279 | 0.4287 | 0.5630 | 0.4480 | 0.2000 | 0.3174 | 0.3042 | 0.0812 | 0.1939 | 0.6684 |        |        |        |        |      |
| [18] D9S1122   | 0.1487 | 0.0013 | 0.0067 | 0.0049 | 0.0537 | 0.0325 | 0.0303 | 0.1185 | 0.0361 | 0.2848 | 0.2387 | 0.0141 | 0.0007 | 0.2406 | 0.3485 | 0.0011 | 0.0626 |        |        |        |      |
| [19] D2S1776   | 0.2452 | 0.1865 | 0.1141 | 0.0123 | 0.0937 | 0.0014 | 0.1446 | 0.0072 | 0.1847 | 0.0872 | 0.4927 | 0.0302 | 0.4630 | 0.3137 | 0.4683 | 0.0045 | 0.0784 | 0.0055 |        |        |      |
| [20] D10S1435  | 0.1586 | 0.1642 | 0.0374 | 0.1149 | 0.0493 | 0.0005 | 0.0007 | 0.1454 | 0.0015 | 0.0688 | 0.0768 | 0.7762 | 0.0247 | 0.1785 | 0.3297 | 0.0905 | 0.0733 | 0.0028 | 0.0268 |        |      |
| [21] D5S2500   | 0.2710 | 0.0005 | 0.0957 | 0.1931 | 0.0561 | 0.0000 | 0.0342 | 0.3938 | 0.3510 | 0.1096 | 0.0246 | 0.2296 | 0.0055 | 0.6242 | 0.0465 | 0.0292 | 0.4326 | 0.1735 | 0.0031 | 0.0363 |      |

**Supplementary Table S4.** The p value of the pairwise linkage disequilibrium in all pairs of 21 Non-CODIS STR loci in the Sichuan Yi population

| Loci           | [01]   | [02]   | [03]   | [04]   | [05]   | [06]   | [07]   | [08]   | [09]   | [10]   | [11]   | [12]   | [13]   | [14]   | [15]   | [16]   | [17]   | [18]   | [19]   | [20]   | [21] |
|----------------|--------|--------|--------|--------|--------|--------|--------|--------|--------|--------|--------|--------|--------|--------|--------|--------|--------|--------|--------|--------|------|
| [01] D6S474    |        |        |        |        |        |        |        |        |        |        |        |        |        |        |        |        |        |        |        |        |      |
| [02] D12ATA63  | 0.5443 |        |        |        |        |        |        |        |        |        |        |        |        |        |        |        |        |        |        |        |      |
| [03] D22S1045  | 0.0770 | 0.0506 |        |        |        |        |        |        |        |        |        |        |        |        |        |        |        |        |        |        |      |
| [04] D10S1248  | 0.9365 | 0.0628 | 0.0003 |        |        |        |        |        |        |        |        |        |        |        |        |        |        |        |        |        |      |
| [05] D1S1677   | 0.7881 | 0.1044 | 0.9483 | 0.6329 |        |        |        |        |        |        |        |        |        |        |        |        |        |        |        |        |      |
| [06] D11S4463  | 0.6234 | 0.3091 | 0.6992 | 0.7768 | 0.3180 |        |        |        |        |        |        |        |        |        |        |        |        |        |        |        |      |
| [07] D1S1627   | 0.9998 | 0.9353 | 0.0359 | 0.1404 | 0.9454 | 0.1479 |        |        |        |        |        |        |        |        |        |        |        |        |        |        |      |
| [08] D3S4529   | 0.2101 | 0.6436 | 0.1989 | 0.8865 | 0.8336 | 0.6007 | 0.0399 |        |        |        |        |        |        |        |        |        |        |        |        |        |      |
| [09] D2S441    | 0.1160 | 0.7116 | 0.0979 | 0.4408 | 0.7493 | 0.9076 | 0.1614 | 0.8885 |        |        |        |        |        |        |        |        |        |        |        |        |      |
| [10] D6S1017   | 0.5148 | 0.9908 | 0.5199 | 0.0000 | 0.2280 | 0.8458 | 0.8809 | 0.9507 | 0.9370 |        |        |        |        |        |        |        |        |        |        |        |      |
| [11] D4S2408   | 0.1853 | 0.2670 | 0.8100 | 0.2380 | 0.8310 | 0.1755 | 0.7805 | 0.9033 | 0.9369 | 0.2176 |        |        |        |        |        |        |        |        |        |        |      |
| [12] D19S433   | 0.0873 | 0.2736 | 0.2806 | 0.1285 | 0.1445 | 0.7038 | 0.8491 | 0.6515 | 0.8172 | 0.6962 | 0.1951 |        |        |        |        |        |        |        |        |        |      |
| [13] D17S1301  | 0.9418 | 0.7922 | 0.6512 | 0.2876 | 0.1115 | 0.7683 | 0.5219 | 0.1866 | 0.5562 | 0.3045 | 0.5750 | 0.4550 |        |        |        |        |        |        |        |        |      |
| [14] D1GATA113 | 0.3110 | 0.9816 | 0.7278 | 0.5932 | 0.4641 | 0.1557 | 0.0439 | 0.1944 | 0.2130 | 0.5615 | 0.5905 | 0.2097 | 0.2072 |        |        |        |        |        |        |        |      |
| [15] D18S853   | 0.1901 | 0.6839 | 0.7061 | 0.0557 | 0.2586 | 0.2546 | 0.9898 | 0.5876 | 0.2092 | 0.0944 | 0.7287 | 0.9498 | 0.5639 | 0.1176 |        |        |        |        |        |        |      |
| [16] D20S482   | 0.8562 | 0.6975 | 0.5188 | 0.0697 | 0.1958 | 0.7053 | 0.7299 | 0.9413 | 0.8689 | 0.2520 | 0.1899 | 0.6925 | 0.5669 | 0.4285 | 0.1417 |        |        |        |        |        |      |
| [17] D14S1434  | 0.2818 | 0.0857 | 0.2959 | 0.4730 | 0.1869 | 0.1290 | 0.8508 | 0.9299 | 0.6891 | 0.9863 | 0.4468 | 0.3653 | 0.6491 | 0.1592 | 0.8779 | 0.6987 |        |        |        |        |      |
| [18] D9S1122   | 0.3413 | 0.8418 | 0.6645 | 0.5550 | 0.5330 | 0.3140 | 0.6880 | 0.7349 | 0.8535 | 0.4010 | 0.3710 | 0.8769 | 0.1241 | 0.2672 | 0.2310 | 0.1858 | 0.1656 |        |        |        |      |
| [19] D2S1776   | 0.3660 | 0.7484 | 0.5178 | 0.1260 | 0.1201 | 0.4858 | 0.5349 | 0.7403 | 0.3779 | 0.9640 | 0.2294 | 0.8046 | 0.0954 | 0.8696 | 0.5586 | 0.2491 | 0.3011 | 0.2758 |        |        |      |
| [20] D10S1435  | 0.1177 | 0.1241 | 0.2957 | 0.0262 | 0.7046 | 0.1662 | 0.4722 | 0.1993 | 0.5921 | 0.0270 | 0.2590 | 0.3570 | 0.6682 | 0.1122 | 0.4331 | 0.5874 | 0.1333 | 0.7974 | 0.6937 |        |      |
| [21] D5S2500   | 0.1059 | 0.3545 | 0.8468 | 0.8955 | 0.3718 | 0.0462 | 0.3414 | 0.5004 | 0.6684 | 0.7605 | 0.4722 | 0.9355 | 0.5669 | 0.5317 | 0.6934 | 0.6236 | 0.3976 | 0.4200 | 0.6568 | 0.4449 |      |

**Supplementary Table S5.** Allele frequencies of 21 non-CODIS STRs included in AGCU 21+1 amplification kit in Sichuan Tibetan population (n = 237)

| Allel | D6S4   | D12AT  | D22S1  | D10S1  | D1S16  | D11S4  | D1S16  | D3S45  | D2S4   | D6S10  | D4S24  | D19S4  | D17S1  | D1GATA | D18S8  | D20S4  | D14S1  | D9S11  | D2S17  | D10S1  | D5S25  |
|-------|--------|--------|--------|--------|--------|--------|--------|--------|--------|--------|--------|--------|--------|--------|--------|--------|--------|--------|--------|--------|--------|
| es    | 74     | A63    | 045    | 248    | 77     | 463    | 27     | 29     | 41     | 17     | 08     | 33     | 301    | 113    | 53     | 82     | 434    | 22     | 76     | 435    | 00     |
| 7     |        |        |        |        |        |        |        |        | 0.0021 | 0.0021 | 0.0021 |        |        | 0.4451 |        |        |        |        | 0.0042 |        |        |
| 8     |        |        | 0.0021 | 0.0021 |        |        |        |        | 0.0042 | 0.2236 | 0.2489 |        | 0.0021 | 0.0063 |        |        |        | 0.0021 | 0.0084 | 0.0042 |        |
| 9     |        |        | 0.0021 | 0.0021 | 0.0021 | 0.0042 |        |        | 0.0042 | 0.0063 | 0.3565 | 0.0021 | 0.0295 |        |        | 0.0021 |        | 0.0021 | 0.1835 | 0.0021 |        |
| 9.1   |        |        |        |        |        |        |        |        | 0.0084 |        |        |        |        |        |        |        |        |        |        |        |        |
| 10    |        |        | 0.0021 |        | 0.0211 | 0.0042 | 0.0253 |        | 0.2637 | 0.3291 | 0.2658 | 0.0021 | 0.0295 | 0.0063 | 0.0084 | 0.0169 | 0.0865 | 0.0696 | 0.0970 | 0.0148 |        |
| 10.1  |        |        |        |        |        |        |        |        |        |        |        |        | 0.0021 |        |        |        |        |        |        |        |        |
| 11    |        | 0.0021 | 0.3249 | 0.0021 | 0.0021 | 0.0042 | 0.0021 |        | 0.3523 | 0.0527 | 0.0781 |        | 0.1709 | 0.1667 | 0.5000 | 0.0063 | 0.1055 | 0.1245 | 0.2131 | 0.1962 |        |
| 11.1  |        |        |        |        |        |        |        |        |        |        |        |        |        |        |        |        |        |        | 0.0042 |        |        |
| 11.3  |        |        |        |        |        |        |        |        | 0.0127 |        |        |        |        |        |        |        |        |        |        |        |        |
| 12    |        | 0.2700 |        | 0.0781 | 0.0042 | 0.0802 | 0.0675 | 0.0021 | 0.1899 | 0.2722 | 0.0485 | 0.0190 | 0.5401 | 0.3439 | 0.0443 | 0.0359 | 0.0148 | 0.2996 | 0.3502 | 0.3629 |        |
| 12.2  |        |        |        |        |        |        |        |        |        |        |        | 0.0063 |        |        |        |        |        |        |        |        |        |
| 13    | 0.0042 | 0.0021 |        | 0.3608 | 0.0759 | 0.1561 | 0.3861 | 0.2342 | 0.0422 | 0.1076 |        | 0.2574 | 0.1835 | 0.0316 | 0.1962 | 0.2278 | 0.2300 | 0.4451 | 0.1076 | 0.2257 | 0.0021 |
| 13.2  |        |        |        |        |        |        |        |        |        |        |        | 0.0359 |        |        |        |        |        |        |        |        |        |
| 14    | 0.4156 | 0.0506 | 0.0169 | 0.2405 | 0.5063 | 0.2595 | 0.5063 | 0.2553 | 0.1118 | 0.0042 |        | 0.2363 | 0.0380 |        | 0.1983 | 0.4620 | 0.5169 | 0.0422 | 0.0295 | 0.1582 | 0.3291 |
| 14.2  |        |        |        |        |        |        |        |        |        |        |        | 0.1730 |        |        |        |        |        |        |        |        |        |
| 14.3  | 0.0063 |        |        |        |        |        |        |        |        |        |        |        |        |        |        |        |        |        |        |        |        |
| 15    | 0.3418 | 0.0253 | 0.1751 | 0.1941 | 0.2911 | 0.2827 | 0.0127 | 0.3502 | 0.0084 | 0.0021 |        | 0.0949 | 0.0042 |        | 0.0506 | 0.1646 | 0.0401 | 0.0105 | 0.0021 | 0.0274 |        |
| 15.2  |        |        |        |        |        |        |        |        |        |        |        | 0.0970 |        |        |        |        |        |        |        |        |        |
| 16    | 0.1392 | 0.1498 | 0.2722 | 0.0970 | 0.0907 | 0.1793 |        | 0.1350 |        |        |        | 0.0253 |        |        | 0.0021 | 0.0844 | 0.0042 | 0.0021 |        | 0.0084 | 0.0021 |
| 16.2  |        |        |        |        |        |        |        |        |        |        |        | 0.0380 |        |        |        |        |        |        |        |        |        |
| 17    | 0.0759 | 0.4283 | 0.1941 | 0.0232 | 0.0063 | 0.0274 |        | 0.0232 |        |        |        | 0.0063 |        |        |        |        | 0.0021 |        |        |        | 0.3502 |
| 17.2  |        |        |        |        |        |        |        |        |        |        |        | 0.0042 |        |        |        |        |        |        |        |        |        |
| 18    | 0.0169 | 0.0696 | 0.0063 |        |        | 0.0021 |        |        |        |        |        | 0.0021 |        |        |        |        |        | 0.0021 |        |        | 0.2004 |
| 19    |        |        |        |        |        |        |        |        |        |        |        |        |        |        |        |        |        |        |        |        | 0.0042 |
| 20    |        | 0.0021 | 0.0042 |        |        |        |        |        |        |        |        |        |        |        |        |        |        |        |        |        | 0.0823 |
| 21    |        |        |        |        |        |        |        |        |        |        |        |        |        |        |        |        |        |        |        |        | 0.0042 |
| 23    |        |        |        |        |        |        |        |        |        |        |        |        |        |        |        |        |        |        |        |        | 0.0253 |

**Supplementary Table S6.** Allele frequencies of 21 non-CODIS STRs included in the AGCU 21+1 kit in the Sichuan Yi Population (n = 95)

| Allele | D6S4   | D12AT  | D22S10 | D10S12 | D1S16  | D11S44 | D1S16  | D3S45  | D2S4   | D6S10  | D4S24  | D19S4  | D17S13 | D1GATA | D18S8  | D20S4  | D14S14 | D9S11  | D2S17  | D10S14 | D5S25  |  |
|--------|--------|--------|--------|--------|--------|--------|--------|--------|--------|--------|--------|--------|--------|--------|--------|--------|--------|--------|--------|--------|--------|--|
|        | 74     | A63    | 45     | 48     | 77     | 63     | 27     | 29     | 41     | 17     | 08     | 33     | 01     | 113    | 53     | 82     | 34     | 22     | 76     | 35     | 00     |  |
| 7      |        |        |        |        |        |        |        |        |        |        |        |        | 0.0158 | 0.4684 |        |        |        |        |        |        |        |  |
| 8      |        |        |        |        |        |        |        |        | 0.0053 | 0.2053 | 0.1895 |        |        | 0.0053 |        |        |        |        | 0.0105 |        |        |  |
| 9      |        |        |        |        |        | 0.0053 |        |        | 0.0105 |        | 0.3000 | 0.0053 | 0.0526 |        |        |        |        |        | 0.0842 |        |        |  |
| 10     |        |        |        |        | 0.0105 | 0.0105 | 0.0211 |        | 0.2947 | 0.3579 | 0.3737 |        | 0.0895 |        | 0.0263 | 0.0368 | 0.0632 | 0.0632 | 0.1579 | 0.0211 |        |  |
| 11     |        |        | 0.3316 | 0.0105 |        |        | 0.0947 |        | 0.3000 | 0.0368 | 0.1158 |        | 0.2316 | 0.2053 | 0.4263 | 0.0105 | 0.1421 | 0.1211 | 0.2684 | 0.1947 |        |  |
| 11.3   |        |        |        |        |        |        |        |        | 0.0526 |        |        |        |        |        |        |        |        |        |        |        |        |  |
| 12     |        | 0.3158 |        | 0.0263 | 0.0105 | 0.0211 | 0.0895 |        | 0.1158 | 0.3053 | 0.0211 | 0.0263 | 0.4105 | 0.2842 | 0.0789 | 0.0368 | 0.0263 | 0.3316 | 0.3316 | 0.3474 |        |  |
| 13     | 0.0105 |        |        | 0.2737 | 0.0526 | 0.2263 | 0.4895 | 0.2684 | 0.0474 | 0.0947 |        | 0.3158 | 0.1684 | 0.0368 | 0.1684 | 0.1947 | 0.2474 | 0.4211 | 0.0789 | 0.2684 |        |  |
| 13.2   |        |        |        |        |        |        |        |        |        |        |        | 0.0263 |        |        |        |        |        |        |        |        |        |  |
| 14     | 0.4421 | 0.0263 | 0.0105 | 0.1368 | 0.5053 | 0.3211 | 0.2526 | 0.2421 | 0.1526 |        |        | 0.2421 | 0.0316 |        | 0.2053 | 0.4474 | 0.5000 | 0.0211 | 0.0632 | 0.1474 | 0.3684 |  |
| 14.2   |        |        |        |        |        |        |        |        |        |        |        | 0.1053 |        |        |        |        |        |        |        |        |        |  |
| 15     | 0.2842 | 0.0158 | 0.1789 | 0.1947 | 0.3211 | 0.2211 | 0.0474 | 0.2895 | 0.0211 |        |        | 0.0737 |        |        | 0.0895 | 0.2000 | 0.0158 | 0.0105 | 0.0053 | 0.0158 |        |  |
| 15.2   |        |        |        |        |        |        |        |        |        |        |        | 0.1000 |        |        |        |        |        |        |        |        |        |  |
| 16     | 0.1316 | 0.2053 | 0.2263 | 0.0158 | 0.0895 | 0.1632 | 0.0053 | 0.1632 |        |        |        | 0.0316 |        |        | 0.0053 | 0.0737 | 0.0053 | 0.0105 |        | 0.0053 | 0.0053 |  |
| 16.2   |        |        |        |        |        |        |        |        |        |        |        | 0.0737 |        |        |        |        |        |        |        |        |        |  |
| 17     | 0.1158 | 0.3211 | 0.2421 | 0.1684 | 0.0105 | 0.0316 |        | 0.0368 |        |        |        |        |        |        |        |        |        | 0.0211 |        |        | 0.2842 |  |
| 18     | 0.0105 | 0.1105 | 0.0053 | 0.0105 |        |        |        |        |        |        |        |        |        |        |        |        |        |        |        |        | 0.2316 |  |
| 19     |        | 0.0053 | 0.0053 | 0.1263 |        |        |        |        |        |        |        |        |        |        |        |        |        |        |        |        |        |  |
| 20     | 0.0053 |        |        | 0.0368 |        |        |        |        |        |        |        |        |        |        |        |        |        |        |        |        | 0.1053 |  |
| 23     |        |        |        |        |        |        |        |        |        |        |        |        |        |        |        |        |        |        |        |        | 0.0053 |  |



**Supplementary Table S7.** The Fst and corresponding p value between the Sichuan Tibetan and 27 Chinese reference populations

| Loci      | Fst and p | LST     | QHS     | HBTJ    | YNB     | NXH     | AU      | ILK     | FJS     | IMM     | NH      | GNH     | YNY     | HNL     | GGH     |
|-----------|-----------|---------|---------|---------|---------|---------|---------|---------|---------|---------|---------|---------|---------|---------|---------|
| D1GATA113 | Fst       | -0.0028 | -0.0060 | 0.0060  | -0.0018 | -0.0027 | -0.0016 | -0.0011 | 0.0005  | -0.0005 | 0.0048  | 0.0033  | 0.0105  | 0.0030  | -0.0004 |
|           | p         | 0.5646  | 0.9831  | 0.1439  | 0.4767  | 0.7142  | 0.6416  | 0.4361  | 0.3256  | 0.4275  | 0.1069  | 0.1465  | 0.0646  | 0.1308  | 0.4182  |
| D1S1627   | Fst       | 0.0543  | 0.0444  | 0.0768  | 0.0607  | 0.0678  | 0.0428  | 0.0256  | 0.1409  | 0.0522  | 0.0617  | 0.0577  | 0.0641  | 0.0893  | 0.0866  |
|           | p         | 0.0006  | 0.0006  | 0.0000  | 0.0002  | 0.0000  | 0.0000  | 0.0103  | 0.0000  | 0.0000  | 0.0000  | 0.0000  | 0.0000  | 0.0000  | 0.0000  |
| D1S1677   | Fst       | -0.0017 | 0.0042  | 0.0005  | 0.0109  | -0.0011 | 0.0033  | 0.0056  | 0.0000  | 0.0103  | 0.0016  | -0.0004 | -0.0042 | 0.0090  | -0.0008 |
|           | p         | 0.4917  | 0.1678  | 0.3215  | 0.0612  | 0.4742  | 0.1014  | 0.1266  | 0.3642  | 0.0095  | 0.2428  | 0.4016  | 0.7764  | 0.0108  | 0.5048  |
| D2S441    | Fst       | 0.0014  | -0.0001 | 0.0068  | 0.0000  | -0.0015 | 0.0023  | 0.0012  | -0.0041 | -0.0006 | -0.0017 | -0.0024 | 0.0048  | 0.0095  | 0.0052  |
|           | p         | 0.2993  | 0.3858  | 0.0938  | 0.3907  | 0.5867  | 0.1311  | 0.2965  | 0.9196  | 0.4866  | 0.6495  | 0.8024  | 0.1326  | 0.0049  | 0.0267  |
| D2S1776   | Fst       | -0.0041 | 0.0001  | 0.0010  | 0.0045  | 0.0023  | 0.0036  | 0.0079  | 0.0011  | 0.0056  | 0.0010  | 0.0031  | 0.0135  | 0.0126  | 0.0081  |
|           | p         | 0.8183  | 0.3888  | 0.3145  | 0.1526  | 0.1859  | 0.0725  | 0.0632  | 0.2957  | 0.0277  | 0.2882  | 0.1263  | 0.0220  | 0.0015  | 0.0078  |
| D3S4529   | Fst       | 0.0067  | -0.0028 | -0.0051 | -0.0021 | 0.0002  | 0.0061  | -0.0028 | 0.0141  | -0.0003 | 0.0001  | 0.0026  | -0.0024 | 0.0071  | -0.0008 |
|           | p         | 0.1136  | 0.6498  | 0.8668  | 0.5611  | 0.3658  | 0.0282  | 0.6481  | 0.0119  | 0.4266  | 0.3714  | 0.1687  | 0.5967  | 0.0158  | 0.5159  |
| D4S2408   | Fst       | 0.0015  | 0.0159  | -0.0036 | -0.0063 | 0.0003  | 0.0145  | 0.0049  | -0.0014 | 0.1214  | 0.0049  | 0.0035  | 0.0218  | 0.0220  | 0.0162  |
|           | p         | 0.2974  | 0.0148  | 0.7173  | 0.9836  | 0.3460  | 0.0010  | 0.1462  | 0.5329  | 0.0000  | 0.0888  | 0.1289  | 0.0048  | 0.0000  | 0.0006  |
| D5S2500   | Fst       | -0.0051 | 0.0005  | 0.0005  | -0.0024 | 0.0047  | 0.0067  | -0.0012 | 0.0051  | -0.0010 | 0.0016  | 0.0045  | -0.0031 | 0.0182  | 0.0058  |
|           | p         | 0.8671  | 0.3377  | 0.3457  | 0.5674  | 0.1117  | 0.0253  | 0.4704  | 0.1162  | 0.5601  | 0.2338  | 0.0934  | 0.6566  | 0.0004  | 0.0392  |
| D6S474    | Fst       | -0.0049 | -0.0029 | 0.0090  | -0.0040 | 0.0014  | 0.0051  | 0.0032  | 0.0014  | -0.0006 | 0.0021  | -0.0021 | 0.0000  | 0.0075  | 0.0059  |
|           | p         | 0.8332  | 0.6511  | 0.0724  | 0.7214  | 0.2587  | 0.0470  | 0.2048  | 0.2708  | 0.4691  | 0.2184  | 0.7018  | 0.3769  | 0.0186  | 0.0383  |
| D6S1017   | Fst       | 0.0037  | -0.0051 | -0.0024 | 0.0070  | 0.0018  | 0.0092  | -0.0003 | 0.0113  | -0.0009 | 0.0015  | -0.0027 | 0.0009  | 0.0205  | 0.0145  |
|           | p         | 0.1906  | 0.9444  | 0.6019  | 0.0996  | 0.2213  | 0.0072  | 0.4113  | 0.0233  | 0.5520  | 0.2492  | 0.8554  | 0.3236  | 0.0000  | 0.0009  |
| D9S1122   | Fst       | -0.0057 | -0.0029 | -0.0026 | -0.0058 | 0.0117  | 0.0068  | 0.0054  | -0.0032 | 0.0024  | 0.0015  | 0.0044  | 0.0141  | 0.0037  | 0.0018  |
|           | p         | 0.9516  | 0.6531  | 0.6034  | 0.9640  | 0.0164  | 0.0242  | 0.1285  | 0.7735  | 0.1412  | 0.2363  | 0.0855  | 0.0264  | 0.0893  | 0.1721  |
| D10S1248  | Fst       | -0.0030 | -0.0031 | -0.0052 | -0.0044 | -0.0035 | 0.0022  | 0.0000  | 0.0210  | -0.0019 | -0.0024 | -0.0022 | -0.0040 | -0.0027 | -0.0017 |
|           | p         | 0.6809  | 0.7188  | 0.9197  | 0.8436  | 0.9266  | 0.1439  | 0.3931  | 0.0018  | 0.8262  | 0.7595  | 0.7795  | 0.7999  | 0.9864  | 0.7566  |
| D10S1435  | Fst       | -0.0012 | -0.0012 | -0.0023 | -0.0042 | 0.0012  | 0.0006  | -0.0034 | -0.0011 | -0.0009 | 0.0023  | -0.0003 | 0.0062  | 0.0005  | 0.0004  |
|           | p         | 0.4851  | 0.4952  | 0.6039  | 0.8073  | 0.2703  | 0.3071  | 0.7473  | 0.5035  | 0.5771  | 0.1812  | 0.4219  | 0.1110  | 0.3168  | 0.3270  |
| D11S4463  | Fst       | -0.0019 | 0.0112  | 0.0001  | 0.0073  | 0.0035  | 0.0130  | 0.0165  | 0.0253  | 0.0034  | 0.0014  | 0.0052  | 0.0166  | 0.0097  | 0.0118  |
|           | p         | 0.5692  | 0.0292  | 0.3930  | 0.0797  | 0.1240  | 0.0005  | 0.0076  | 0.0004  | 0.0760  | 0.2511  | 0.0610  | 0.0082  | 0.0047  | 0.0011  |

|          |     |         |         |         |         |         |        |         |         |        |        |        |         |         |        |
|----------|-----|---------|---------|---------|---------|---------|--------|---------|---------|--------|--------|--------|---------|---------|--------|
| D12ATA63 | Fst | 0.0026  | -0.0040 | 0.0021  | -0.0017 | 0.0039  | 0.0129 | 0.0047  | 0.0159  | 0.0050 | 0.0077 | 0.0033 | 0.0087  | 0.0610  | 0.0334 |
|          | p   | 0.2387  | 0.8268  | 0.2470  | 0.5324  | 0.1167  | 0.0013 | 0.1454  | 0.0084  | 0.0459 | 0.0372 | 0.1267 | 0.0593  | 0.0000  | 0.0000 |
| D14S1434 | Fst | 0.0045  | 0.0143  | -0.0030 | 0.0119  | 0.0136  | 0.0117 | 0.0187  | -0.0040 | 0.0111 | 0.0127 | 0.0182 | -0.0028 | 0.0129  | 0.0009 |
|          | p   | 0.1692  | 0.0216  | 0.6297  | 0.0418  | 0.0118  | 0.0033 | 0.0088  | 0.8965  | 0.0050 | 0.0084 | 0.0016 | 0.6308  | 0.0026  | 0.2579 |
| D17S1301 | Fst | 0.0007  | -0.0032 | 0.0043  | -0.0028 | -0.0006 | 0.0044 | 0.0224  | 0.0012  | 0.0085 | 0.0068 | 0.0022 | 0.0287  | -0.0018 | 0.0038 |
|          | p   | 0.3256  | 0.7038  | 0.1666  | 0.6048  | 0.4406  | 0.0602 | 0.0043  | 0.2724  | 0.0114 | 0.0488 | 0.1835 | 0.0029  | 0.7639  | 0.0719 |
| D18S853  | Fst | -0.0018 | 0.0067  | 0.0006  | 0.0263  | 0.0033  | 0.0032 | 0.0070  | 0.0145  | 0.0122 | 0.0106 | 0.0052 | 0.0118  | 0.0002  | 0.0032 |
|          | p   | 0.5115  | 0.1023  | 0.3352  | 0.0034  | 0.1527  | 0.0994 | 0.1021  | 0.0157  | 0.0029 | 0.0170 | 0.0737 | 0.0398  | 0.3406  | 0.0994 |
| D19S433  | Fst | 0.0030  | -0.0011 | -0.0023 | -0.0002 | -0.0024 | 0.0057 | -0.0015 | 0.0104  | 0.0023 | 0.0017 | 0.0017 | 0.0044  | 0.0021  | 0.0011 |
|          | p   | 0.1916  | 0.5442  | 0.6736  | 0.4284  | 0.8363  | 0.0123 | 0.5860  | 0.0123  | 0.1104 | 0.2030 | 0.1956 | 0.1265  | 0.1159  | 0.2261 |
| D20S482  | Fst | -0.0048 | -0.0018 | -0.0041 | -0.0018 | 0.0001  | 0.0021 | -0.0002 | 0.0048  | 0.0021 | 0.0017 | 0.0007 | 0.0107  | 0.0124  | 0.0074 |
|          | p   | 0.8684  | 0.5490  | 0.7937  | 0.5242  | 0.3615  | 0.1544 | 0.4057  | 0.1208  | 0.1495 | 0.2218 | 0.3020 | 0.0445  | 0.0025  | 0.0212 |
| D22S1045 | Fst | -0.0026 | 0.0660  | 0.0196  | 0.0007  | 0.0064  | 0.0210 | 0.0015  | 0.0980  | 0.0060 | 0.0399 | 0.0096 | 0.0868  | 0.0386  | 0.0213 |
|          | p   | 0.6099  | 0.0000  | 0.0058  | 0.3372  | 0.0578  | 0.0000 | 0.2889  | 0.0000  | 0.0212 | 0.0000 | 0.0122 | 0.0000  | 0.0000  | 0.0000 |

LST: Lhasa-Tibetan; QHS: Qinghai-Salar; HBTJ: Hubei-Tujia; YNB: Yunnan-Bai; NXH: Ningxia-Han; AU: Kuqa-Uyghur; ILK: Ili-Kazakh; FJS: Fujian-She; IMM: Inner-Mongolia-Mongolian; NH: Northern-Han; GNH: Guanzhong-Han; YNY: Yunnan-Yi; HNL: Hainan-Li; GGH: Guangdong-Han; HNH: Hunan-Han; HDH: Huadong-Han; BJH: Beijing-Han; ZJH: Zhejiang-Han; IMR: Inner-Mongolia-Russian; SDH: Shandong-Han; LNH: Liaoning-Han; HNH-2: Henan-Han-2; GSYG: Gansu-Yugu; XJXO: Xinjiang-Xibe; HNH-1: Henan-Han-1; SCH: Sichuan-Han; SCY: Sichuan Yi

**Supplementary Table S7. (Continue)** The Fst and corresponding p value between the Sichuan Tibetan and 27 Chinese reference populations

| Loci      | Fst and p | HNH     | HDH     | BJH     | ZJH     | IMR     | SDH     | LNH     | HNH-2   | GSYG    | XJXO    | HNH-1   | SCH     | SCY     |
|-----------|-----------|---------|---------|---------|---------|---------|---------|---------|---------|---------|---------|---------|---------|---------|
| D1GATA113 | Fst       | 0.0022  | -0.0010 | 0.0049  | 0.0031  | -0.0054 | 0.0034  | 0.0014  | 0.0023  | -0.0043 | 0.0047  | -0.0018 | -0.0013 | -0.0024 |
|           | p         | 0.1683  | 0.4699  | 0.0708  | 0.1239  | 0.9097  | 0.0907  | 0.2504  | 0.1368  | 0.9368  | 0.0544  | 0.5752  | 0.5620  | 0.5216  |
| D1S1627   | Fst       | 0.0754  | 0.0974  | 0.0607  | 0.0486  | 0.0625  | 0.0609  | 0.0497  | 0.0567  | 0.0871  | 0.0517  | 0.0280  | 0.0590  | 0.0569  |
|           | p         | 0.0000  | 0.0000  | 0.0000  | 0.0000  | 0.0001  | 0.0000  | 0.0000  | 0.0000  | 0.0000  | 0.0000  | 0.0019  | 0.0000  | 0.0004  |
| D1S1677   | Fst       | -0.0006 | -0.0010 | 0.0027  | -0.0006 | -0.0043 | 0.0008  | 0.0006  | 0.0004  | 0.0145  | 0.0010  | -0.0012 | 0.0021  | -0.0057 |
|           | p         | 0.4581  | 0.4915  | 0.1354  | 0.4671  | 0.8165  | 0.2475  | 0.3077  | 0.2966  | 0.0102  | 0.2313  | 0.5096  | 0.1709  | 0.8913  |
| D2S441    | Fst       | 0.0018  | 0.0012  | -0.0019 | -0.0017 | 0.0001  | -0.0010 | -0.0033 | -0.0013 | -0.0012 | -0.0022 | 0.0025  | -0.0008 | 0.0008  |
|           | p         | 0.1644  | 0.2632  | 0.8130  | 0.7664  | 0.3811  | 0.6373  | 0.9034  | 0.7259  | 0.5211  | 0.9627  | 0.1824  | 0.5281  | 0.3373  |
| D2S1776   | Fst       | 0.0010  | 0.0007  | 0.0026  | 0.0082  | 0.0025  | 0.0029  | 0.0019  | 0.0029  | 0.0138  | 0.0064  | 0.0108  | 0.0064  | 0.0056  |
|           | p         | 0.2528  | 0.3170  | 0.1188  | 0.0083  | 0.2281  | 0.0782  | 0.2175  | 0.0768  | 0.0068  | 0.0125  | 0.0118  | 0.0257  | 0.1359  |
| D3S4529   | Fst       | -0.0027 | 0.0005  | -0.0008 | -0.0016 | -0.0009 | 0.0010  | -0.0015 | 0.0012  | 0.0121  | 0.0003  | -0.0013 | -0.0021 | -0.0023 |
|           | p         | 0.9611  | 0.3472  | 0.5269  | 0.7007  | 0.4657  | 0.2260  | 0.5616  | 0.2145  | 0.0163  | 0.3346  | 0.5591  | 0.7821  | 0.5657  |
| D4S2408   | Fst       | 0.0046  | 0.0080  | 0.0035  | 0.0044  | 0.0106  | 0.0036  | -0.0032 | 0.0015  | 0.0115  | 0.0013  | 0.0110  | 0.0059  | 0.0066  |
|           | p         | 0.0523  | 0.0351  | 0.0890  | 0.0638  | 0.0469  | 0.0648  | 0.8454  | 0.1929  | 0.0194  | 0.2158  | 0.0135  | 0.0395  | 0.1298  |
| D5S2500   | Fst       | 0.0060  | 0.0060  | 0.0068  | 0.0021  | 0.0114  | 0.0024  | 0.0030  | 0.0063  | 0.0015  | 0.0057  | 0.0022  | 0.0059  | -0.0021 |
|           | p         | 0.0387  | 0.0681  | 0.0299  | 0.1625  | 0.0429  | 0.1294  | 0.1648  | 0.0230  | 0.2628  | 0.0273  | 0.2023  | 0.0492  | 0.5376  |
| D6S474    | Fst       | 0.0089  | 0.0007  | 0.0026  | -0.0008 | 0.0013  | 0.0022  | -0.0031 | 0.0033  | 0.0085  | 0.0016  | 0.0001  | 0.0036  | -0.0030 |
|           | p         | 0.0126  | 0.3083  | 0.1325  | 0.5178  | 0.2941  | 0.1299  | 0.8134  | 0.0768  | 0.0597  | 0.1777  | 0.3633  | 0.1126  | 0.5936  |
| D6S1017   | Fst       | 0.0073  | 0.0040  | 0.0007  | 0.0058  | 0.0005  | 0.0016  | 0.0022  | 0.0021  | -0.0016 | 0.0026  | -0.0006 | 0.0026  | -0.0055 |
|           | p         | 0.0160  | 0.1157  | 0.2838  | 0.0338  | 0.3551  | 0.1736  | 0.2009  | 0.1360  | 0.5639  | 0.1109  | 0.4571  | 0.1439  | 0.8937  |
| D9S1122   | Fst       | 0.0014  | -0.0004 | 0.0011  | 0.0010  | 0.0038  | 0.0014  | -0.0023 | 0.0026  | 0.0037  | 0.0050  | 0.0005  | 0.0011  | -0.0058 |
|           | p         | 0.2141  | 0.4206  | 0.2407  | 0.2550  | 0.1738  | 0.1833  | 0.6813  | 0.0991  | 0.1535  | 0.0348  | 0.3283  | 0.2472  | 0.9274  |
| D10S1248  | Fst       | -0.0024 | -0.0035 | -0.0003 | -0.0009 | -0.0052 | -0.0010 | -0.0033 | -0.0007 | 0.0002  | -0.0018 | -0.0023 | -0.0028 | 0.0335  |
|           | p         | 0.9414  | 0.9486  | 0.4202  | 0.5538  | 0.9453  | 0.6247  | 0.8909  | 0.5440  | 0.3667  | 0.8690  | 0.7541  | 0.9529  | 0.0000  |
| D10S1435  | Fst       | -0.0011 | -0.0017 | -0.0002 | 0.0187  | 0.0019  | -0.0001 | -0.0014 | 0.0010  | 0.0042  | 0.0002  | 0.0037  | -0.0013 | -0.0057 |
|           | p         | 0.6015  | 0.6346  | 0.4114  | 0.0000  | 0.2636  | 0.4108  | 0.5772  | 0.2206  | 0.1195  | 0.3526  | 0.1230  | 0.6220  | 0.9191  |
| D11S4463  | Fst       | 0.0096  | 0.0052  | 0.0065  | 0.0039  | 0.0067  | 0.0051  | 0.0033  | 0.0072  | 0.0214  | 0.0049  | 0.0075  | 0.0016  | 0.0026  |
|           | p         | 0.0041  | 0.0727  | 0.0172  | 0.0645  | 0.0850  | 0.0209  | 0.1338  | 0.0064  | 0.0006  | 0.0269  | 0.0266  | 0.2115  | 0.2327  |

|          |     |        |         |        |        |         |        |        |        |         |        |        |        |         |
|----------|-----|--------|---------|--------|--------|---------|--------|--------|--------|---------|--------|--------|--------|---------|
| D12ATA63 | Fst | 0.0209 | 0.0121  | 0.0043 | 0.0159 | -0.0040 | 0.0085 | 0.0019 | 0.0103 | 0.0344  | 0.0052 | 0.0056 | 0.0133 | 0.0056  |
|          | p   | 0.0000 | 0.0083  | 0.0658 | 0.0005 | 0.8199  | 0.0066 | 0.2219 | 0.0028 | 0.0001  | 0.0321 | 0.0732 | 0.0025 | 0.1377  |
| D14S1434 | Fst | 0.0076 | 0.0022  | 0.0121 | 0.0049 | 0.0139  | 0.0060 | 0.0066 | 0.0077 | -0.0006 | 0.0056 | 0.0077 | 0.0051 | -0.0059 |
|          | p   | 0.0176 | 0.1938  | 0.0032 | 0.0551 | 0.0220  | 0.0204 | 0.0615 | 0.0104 | 0.4375  | 0.0284 | 0.0438 | 0.0560 | 0.9250  |
| D17S1301 | Fst | 0.0047 | 0.0040  | 0.0045 | 0.0035 | 0.0031  | 0.0027 | 0.0078 | 0.0070 | -0.0033 | 0.0026 | 0.0281 | 0.0044 | 0.0100  |
|          | p   | 0.0504 | 0.1152  | 0.0651 | 0.0849 | 0.1913  | 0.0984 | 0.0442 | 0.0132 | 0.8298  | 0.1059 | 0.0001 | 0.0740 | 0.0639  |
| D18S853  | Fst | 0.0022 | 0.0038  | 0.0048 | 0.0058 | 0.0022  | 0.0063 | 0.0067 | 0.0030 | -0.0008 | 0.0066 | 0.0225 | 0.0042 | -0.0009 |
|          | p   | 0.1451 | 0.1301  | 0.0561 | 0.0430 | 0.2399  | 0.0168 | 0.0598 | 0.0857 | 0.4557  | 0.0171 | 0.0009 | 0.0830 | 0.4418  |
| D19S433  | Fst | 0.0031 | 0.0016  | 0.0059 | 0.0019 | 0.0014  | 0.0029 | 0.0028 | 0.0031 | 0.0069  | 0.0024 | 0.0037 | 0.0028 | -0.0009 |
|          | p   | 0.0650 | 0.2057  | 0.0173 | 0.1392 | 0.2785  | 0.0620 | 0.1438 | 0.0445 | 0.0274  | 0.0821 | 0.0892 | 0.0951 | 0.4946  |
| D20S482  | Fst | 0.0011 | -0.0005 | 0.0042 | 0.0032 | 0.0033  | 0.0004 | 0.0142 | 0.0017 | 0.0062  | 0.0009 | 0.0022 | 0.0087 | -0.0053 |
|          | p   | 0.2451 | 0.4399  | 0.0691 | 0.1097 | 0.1951  | 0.3079 | 0.0078 | 0.1649 | 0.0708  | 0.2491 | 0.1956 | 0.0152 | 0.8678  |
| D22S1045 | Fst | 0.0183 | 0.0149  | 0.0085 | 0.3024 | 0.0866  | 0.0107 | 0.0066 | 0.0080 | 0.0019  | 0.0058 | 0.0040 | 0.0179 | -0.0039 |
|          | p   | 0.0000 | 0.0017  | 0.0091 | 0.0000 | 0.0000  | 0.0005 | 0.0535 | 0.0038 | 0.2495  | 0.0180 | 0.1196 | 0.0003 | 0.7189  |

LST: Lhasa-Tibetan; QHS: Qinghai-Salar; HBTJ: Hubei-Tujia; YNB: Yunnan-Bai; NXH: Ningxia-Han; AU: Kuqa-Uyghur; ILK: Ili-Kazakh; FJS: Fujian-She; IMM: Inner-Mongolia-Mongolian; NH: Northern-Han; GNH: Guanzhong-Han; YNY: Yunnan-Yi; HNL: Hainan-Li; GGH: Guangdong-Han; HNH: Hunan-Han; HDH: Huadong-Han; BJH: Beijing-Han; ZJH: Zhejiang-Han; IMR: Inner-Mongolia-Russian; SDH: Shandong-Han; LNH: Liaoning-Han; HNH-2: Henan-Han-2; GSYG: Gansu-Yugu; XJXO: Xinjiang-Xibe; HNH-1: Henan-Han-1; SCH: Sichuan-Han; SCY: Sichuan Yi

**Supplementary Table S8.** The Fst and corresponding p value between the Sichuan Yi and 27 Chinese reference populations

| Loci      | Fst and p | LST     | QHS     | HBTJ    | YNB     | NXH     | AU      | ILK     | FJS     | IMM     | NH      | GNH     | YNY     | HNL     | GGH     |
|-----------|-----------|---------|---------|---------|---------|---------|---------|---------|---------|---------|---------|---------|---------|---------|---------|
| D1GATA113 | Fst       | -0.0092 | -0.0035 | -0.0019 | 0.0006  | -0.0061 | 0.0054  | 0.0101  | 0.0103  | -0.0010 | -0.0020 | -0.0045 | 0.0226  | -0.0007 | 0.0000  |
|           | p         | 0.9747  | 0.5513  | 0.4535  | 0.3336  | 0.8711  | 0.1414  | 0.1088  | 0.0994  | 0.4261  | 0.4996  | 0.7282  | 0.0330  | 0.4118  | 0.3622  |
| D1S1627   | Fst       | 0.0108  | -0.0029 | 0.0043  | 0.0074  | 0.0053  | 0.0005  | 0.0063  | 0.0313  | 0.0052  | 0.0052  | 0.0047  | 0.0015  | 0.0212  | 0.0097  |
|           | p         | 0.1039  | 0.5336  | 0.2031  | 0.1446  | 0.1592  | 0.3304  | 0.1641  | 0.0068  | 0.1435  | 0.1576  | 0.1613  | 0.2990  | 0.0066  | 0.0604  |
| D1S1677   | Fst       | -0.0035 | 0.0081  | -0.0039 | 0.0056  | -0.0061 | 0.0022  | 0.0050  | -0.0018 | 0.0048  | 0.0016  | -0.0035 | -0.0066 | 0.0107  | -0.0039 |
|           | p         | 0.5490  | 0.1346  | 0.5808  | 0.1919  | 0.8912  | 0.2414  | 0.1800  | 0.4617  | 0.1428  | 0.2804  | 0.6392  | 0.7875  | 0.0455  | 0.7586  |
| D2S441    | Fst       | -0.0052 | -0.0033 | -0.0042 | 0.0005  | 0.0060  | -0.0036 | -0.0028 | 0.0044  | 0.0032  | -0.0043 | 0.0049  | -0.0005 | 0.0134  | 0.0055  |
|           | p         | 0.7523  | 0.6127  | 0.6837  | 0.3621  | 0.1237  | 0.8227  | 0.5663  | 0.1855  | 0.1828  | 0.8084  | 0.1479  | 0.4275  | 0.0109  | 0.1001  |
| D2S1776   | Fst       | 0.0027  | 0.0001  | 0.0042  | 0.0061  | -0.0016 | 0.0005  | -0.0037 | 0.0062  | 0.0032  | 0.0085  | 0.0030  | 0.0114  | 0.0126  | 0.0108  |
|           | p         | 0.2587  | 0.3840  | 0.2012  | 0.1545  | 0.5204  | 0.3572  | 0.6534  | 0.1365  | 0.1835  | 0.0769  | 0.2016  | 0.0796  | 0.0284  | 0.0384  |
| D3S4529   | Fst       | -0.0048 | -0.0056 | -0.0060 | -0.0027 | 0.0031  | -0.0044 | -0.0079 | 0.0069  | 0.0046  | 0.0082  | 0.0108  | -0.0053 | -0.0039 | -0.0046 |
|           | p         | 0.6929  | 0.7710  | 0.7605  | 0.5452  | 0.2267  | 0.8649  | 0.9320  | 0.1422  | 0.1436  | 0.0968  | 0.0519  | 0.7354  | 0.8084  | 0.8784  |
| D4S2408   | Fst       | -0.0082 | 0.0006  | 0.0006  | 0.0027  | -0.0009 | -0.0016 | 0.0224  | 0.0053  | 0.1191  | 0.0061  | -0.0004 | -0.0040 | -0.0019 | -0.0046 |
|           | p         | 0.9157  | 0.3602  | 0.3597  | 0.2761  | 0.4508  | 0.5342  | 0.0171  | 0.1754  | 0.0000  | 0.1370  | 0.4065  | 0.6284  | 0.5681  | 0.8696  |
| D5S2500   | Fst       | -0.0067 | 0.0006  | -0.0055 | -0.0066 | -0.0039 | -0.0036 | 0.0100  | 0.0039  | -0.0044 | -0.0058 | -0.0035 | -0.0042 | 0.0004  | -0.0051 |
|           | p         | 0.8202  | 0.3507  | 0.7207  | 0.7970  | 0.6753  | 0.7471  | 0.1054  | 0.2146  | 0.8368  | 0.8874  | 0.6609  | 0.6231  | 0.3523  | 0.9217  |
| D6S474    | Fst       | -0.0012 | -0.0065 | 0.0177  | -0.0039 | 0.0003  | 0.0079  | 0.0055  | 0.0021  | 0.0022  | 0.0039  | 0.0017  | -0.0014 | 0.0148  | 0.0164  |
|           | p         | 0.4316  | 0.8488  | 0.0409  | 0.5967  | 0.3673  | 0.0746  | 0.1872  | 0.2702  | 0.2449  | 0.2037  | 0.2727  | 0.4548  | 0.0190  | 0.0172  |
| D6S1017   | Fst       | 0.0033  | -0.0072 | -0.0047 | 0.0009  | -0.0059 | 0.0027  | -0.0048 | 0.0040  | -0.0051 | -0.0026 | -0.0065 | -0.0051 | 0.0130  | 0.0071  |
|           | p         | 0.2493  | 0.9063  | 0.6837  | 0.3466  | 0.8921  | 0.2220  | 0.6789  | 0.2031  | 0.9289  | 0.5661  | 0.9859  | 0.7084  | 0.0264  | 0.0934  |
| D9S1122   | Fst       | -0.0082 | -0.0078 | -0.0049 | -0.0085 | 0.0044  | 0.0019  | 0.0041  | -0.0034 | -0.0012 | -0.0022 | 0.0000  | 0.0064  | -0.0006 | -0.0030 |
|           | p         | 0.9464  | 0.9543  | 0.6826  | 0.9626  | 0.1875  | 0.2538  | 0.2237  | 0.6083  | 0.4877  | 0.5481  | 0.3813  | 0.1640  | 0.4194  | 0.6585  |
| D10S1248  | Fst       | 0.0356  | 0.0352  | 0.0322  | 0.0315  | 0.0344  | 0.0308  | 0.0295  | 0.0724  | 0.0348  | 0.0369  | 0.0369  | 0.0360  | 0.0313  | 0.0352  |
|           | p         | 0.0005  | 0.0011  | 0.0016  | 0.0025  | 0.0003  | 0.0003  | 0.0023  | 0.0000  | 0.0002  | 0.0006  | 0.0001  | 0.0009  | 0.0002  | 0.0000  |
| D10S1435  | Fst       | -0.0048 | -0.0055 | -0.0062 | -0.0092 | -0.0028 | -0.0042 | -0.0059 | -0.0070 | -0.0034 | -0.0023 | -0.0058 | 0.0114  | -0.0015 | -0.0026 |
|           | p         | 0.6855  | 0.7770  | 0.8297  | 0.9963  | 0.6148  | 0.8524  | 0.8207  | 0.9597  | 0.7786  | 0.5936  | 0.9524  | 0.0761  | 0.5388  | 0.6627  |
| D11S4463  | Fst       | 0.0038  | -0.0013 | -0.0007 | -0.0017 | -0.0031 | -0.0014 | 0.0041  | 0.0079  | -0.0033 | -0.0027 | -0.0002 | 0.0036  | -0.0024 | -0.0022 |

|          |     |         |         |         |         |         |         |         |         |         |         |         |         |         |         |
|----------|-----|---------|---------|---------|---------|---------|---------|---------|---------|---------|---------|---------|---------|---------|---------|
|          | p   | 0.2351  | 0.4584  | 0.4253  | 0.4782  | 0.6386  | 0.5178  | 0.2151  | 0.1120  | 0.7481  | 0.6244  | 0.4004  | 0.2428  | 0.6440  | 0.6149  |
| D12ATA63 | Fst | 0.0316  | -0.0033 | -0.0086 | -0.0066 | -0.0034 | -0.0021 | 0.0166  | -0.0033 | -0.0029 | -0.0044 | -0.0035 | -0.0041 | 0.0190  | 0.0021  |
|          | p   | 0.0077  | 0.5920  | 0.9769  | 0.8327  | 0.6606  | 0.6034  | 0.0336  | 0.6098  | 0.6794  | 0.7653  | 0.6918  | 0.6659  | 0.0033  | 0.2387  |
| D14S1434 | Fst | 0.0015  | 0.0047  | -0.0091 | 0.0050  | 0.0044  | 0.0053  | 0.0110  | -0.0053 | 0.0040  | 0.0064  | 0.0106  | -0.0082 | 0.0053  | -0.0052 |
|          | p   | 0.3063  | 0.1994  | 0.9862  | 0.1944  | 0.1833  | 0.1252  | 0.0871  | 0.7846  | 0.1723  | 0.1262  | 0.0566  | 0.9616  | 0.1293  | 0.9507  |
| D17S1301 | Fst | -0.0043 | 0.0038  | -0.0075 | 0.0053  | 0.0035  | -0.0024 | -0.0021 | -0.0014 | -0.0027 | -0.0030 | -0.0007 | -0.0021 | 0.0052  | -0.0001 |
|          | p   | 0.6456  | 0.2157  | 0.9241  | 0.1898  | 0.2046  | 0.6093  | 0.4993  | 0.4750  | 0.6579  | 0.6451  | 0.4272  | 0.5072  | 0.1338  | 0.3819  |
| D18S853  | Fst | -0.0017 | -0.0015 | -0.0081 | 0.0051  | -0.0051 | -0.0026 | -0.0053 | 0.0090  | 0.0002  | -0.0012 | -0.0019 | -0.0014 | 0.0047  | -0.0026 |
|          | p   | 0.4763  | 0.4581  | 0.9380  | 0.1973  | 0.8187  | 0.6431  | 0.7452  | 0.0941  | 0.3662  | 0.4649  | 0.5298  | 0.4669  | 0.1433  | 0.6409  |
| D19S433  | Fst | 0.0022  | -0.0039 | -0.0009 | -0.0059 | -0.0045 | 0.0002  | 0.0009  | 0.0089  | -0.0012 | -0.0038 | -0.0029 | -0.0028 | -0.0008 | -0.0030 |
|          | p   | 0.2758  | 0.7292  | 0.4587  | 0.8773  | 0.8619  | 0.3796  | 0.3532  | 0.0703  | 0.5435  | 0.8040  | 0.7145  | 0.6211  | 0.4925  | 0.7923  |
| D20S482  | Fst | -0.0044 | -0.0020 | -0.0015 | -0.0082 | 0.0015  | 0.0031  | -0.0007 | -0.0002 | 0.0003  | 0.0013  | -0.0019 | 0.0140  | 0.0134  | 0.0106  |
|          | p   | 0.6478  | 0.4989  | 0.4541  | 0.9390  | 0.2933  | 0.1942  | 0.4173  | 0.3941  | 0.3575  | 0.2950  | 0.5477  | 0.0565  | 0.0235  | 0.0504  |
| D22S1045 | Fst | 0.0011  | 0.0617  | 0.0211  | -0.0036 | 0.0060  | 0.0181  | 0.0081  | 0.0971  | 0.0057  | 0.0370  | 0.0097  | 0.0936  | 0.0315  | 0.0180  |
|          | p   | 0.3420  | 0.0000  | 0.0194  | 0.6133  | 0.1317  | 0.0044  | 0.1280  | 0.0000  | 0.1110  | 0.0000  | 0.0575  | 0.0000  | 0.0003  | 0.0059  |

LST: Lhasa-Tibetan; QHS: Qinghai-Salar; HBTJ: Hubei-Tujia; YNB: Yunnan-Bai; NXH: Ningxia-Han; AU: Kuqa-Uyghur; ILK: Ili-Kazakh; FJS: Fujian-She; IMM: Inner-Mongolia-Mongolian; NH: Northern-Han; GNH: Guanzhong-Han; YNY: Yunnan-Yi; HNL: Hainan-Li; GGH: Guangdong-Han; HNH: Hunan-Han; HDH: Huadong-Han; BJH: Beijing-Han; ZJH: Zhejiang-Han; IMR: Inner-Mongolia-Russian; SDH: Shandong-Han; LNH: Liaoning-Han; HNH-2: Henan-Han-2; GSYG: Gansu-Yugu; XJXO: Xinjiang-Xibe; HNH-1: Henan-Han-1; SCH: Sichuan-Han; SCT: Sichuan Tibetan

**Supplementary Table S8. (Continue)** The Fst and corresponding p value between the Sichuan Yi and 27 Chinese reference populations

| Loci      | Fst and p | HNH     | HDH     | BJH     | ZJH     | IMR     | SDH     | LNH     | HNH-2   | GSYG    | XJXO    | HNH-1   | SCH     | SCT     |
|-----------|-----------|---------|---------|---------|---------|---------|---------|---------|---------|---------|---------|---------|---------|---------|
| D1GATA113 | Fst       | -0.0021 | 0.0021  | -0.0012 | -0.0032 | -0.0042 | -0.0027 | -0.0016 | -0.0021 | -0.0001 | -0.0019 | -0.0048 | -0.0051 | -0.0024 |
|           | p         | 0.5212  | 0.2683  | 0.4382  | 0.6465  | 0.6044  | 0.6003  | 0.4584  | 0.5564  | 0.3617  | 0.5188  | 0.7474  | 0.8308  | 0.5264  |
| D1S1627   | Fst       | 0.0069  | 0.0131  | 0.0050  | 0.0058  | 0.0015  | 0.0067  | 0.0019  | 0.0061  | 0.0200  | 0.0059  | 0.0131  | 0.0038  | 0.0569  |
|           | p         | 0.1047  | 0.0497  | 0.1440  | 0.1281  | 0.2964  | 0.0978  | 0.2686  | 0.1138  | 0.0295  | 0.1168  | 0.0603  | 0.1874  | 0.0009  |
| D1S1677   | Fst       | -0.0032 | -0.0031 | 0.0000  | -0.0019 | -0.0047 | -0.0020 | -0.0007 | -0.0029 | 0.0145  | -0.0020 | -0.0047 | 0.0000  | -0.0057 |
|           | p         | 0.6608  | 0.5968  | 0.3573  | 0.5210  | 0.6721  | 0.5357  | 0.4076  | 0.6521  | 0.0353  | 0.5561  | 0.7621  | 0.3580  | 0.8890  |
| D2S441    | Fst       | 0.0036  | 0.0064  | 0.0006  | -0.0007 | 0.0097  | 0.0001  | -0.0005 | 0.0013  | 0.0089  | 0.0031  | 0.0101  | -0.0012 | 0.0008  |
|           | p         | 0.1657  | 0.1040  | 0.3347  | 0.4591  | 0.0949  | 0.3699  | 0.4276  | 0.2886  | 0.0820  | 0.1785  | 0.0602  | 0.5111  | 0.3459  |
| D2S1776   | Fst       | 0.0065  | 0.0084  | 0.0056  | 0.0040  | -0.0026 | 0.0061  | 0.0005  | 0.0059  | 0.0086  | 0.0048  | 0.0026  | 0.0021  | 0.0056  |
|           | p         | 0.0875  | 0.0780  | 0.1073  | 0.1549  | 0.5618  | 0.0832  | 0.3561  | 0.0871  | 0.0817  | 0.1222  | 0.2362  | 0.2496  | 0.1261  |
| D3S4529   | Fst       | -0.0017 | 0.0079  | 0.0042  | -0.0012 | 0.0026  | 0.0073  | 0.0059  | 0.0089  | 0.0307  | 0.0059  | 0.0042  | -0.0036 | -0.0023 |
|           | p         | 0.5469  | 0.0952  | 0.1627  | 0.4918  | 0.2822  | 0.0660  | 0.1359  | 0.0463  | 0.0026  | 0.1047  | 0.1840  | 0.7272  | 0.5669  |
| D4S2408   | Fst       | -0.0043 | -0.0050 | -0.0037 | -0.0014 | -0.0049 | 0.0001  | 0.0005  | -0.0004 | 0.0001  | 0.0006  | 0.0048  | -0.0050 | 0.0066  |
|           | p         | 0.8250  | 0.8246  | 0.7555  | 0.5024  | 0.6919  | 0.3839  | 0.3520  | 0.4184  | 0.3805  | 0.3375  | 0.1726  | 0.8879  | 0.1167  |
| D5S2500   | Fst       | -0.0053 | -0.0051 | -0.0037 | -0.0060 | -0.0008 | -0.0045 | -0.0053 | -0.0029 | -0.0034 | -0.0023 | -0.0020 | -0.0046 | -0.0021 |
|           | p         | 0.9424  | 0.8114  | 0.7231  | 0.9962  | 0.4189  | 0.8952  | 0.8147  | 0.6589  | 0.6193  | 0.6078  | 0.5306  | 0.8274  | 0.5421  |
| D6S474    | Fst       | 0.0163  | 0.0035  | 0.0051  | 0.0014  | -0.0069 | 0.0044  | -0.0010 | 0.0065  | 0.0222  | 0.0060  | -0.0027 | 0.0092  | -0.0030 |
|           | p         | 0.0152  | 0.2070  | 0.1294  | 0.2827  | 0.8441  | 0.1471  | 0.4447  | 0.0897  | 0.0203  | 0.1022  | 0.5800  | 0.0700  | 0.6015  |
| D6S1017   | Fst       | 0.0025  | -0.0034 | -0.0030 | 0.0013  | -0.0017 | -0.0034 | -0.0059 | -0.0023 | -0.0042 | -0.0020 | -0.0049 | -0.0018 | -0.0055 |
|           | p         | 0.2317  | 0.6421  | 0.6671  | 0.3067  | 0.4671  | 0.7565  | 0.8771  | 0.6122  | 0.7117  | 0.5550  | 0.7911  | 0.5389  | 0.8938  |
| D9S1122   | Fst       | -0.0031 | -0.0045 | -0.0010 | -0.0027 | -0.0025 | -0.0019 | -0.0047 | -0.0010 | -0.0035 | 0.0007  | 0.0013  | -0.0029 | -0.0058 |
|           | p         | 0.6899  | 0.7620  | 0.4615  | 0.6343  | 0.5155  | 0.5655  | 0.7784  | 0.4733  | 0.6193  | 0.3280  | 0.3020  | 0.6289  | 0.9253  |
| D10S1248  | Fst       | 0.0377  | 0.0338  | 0.0422  | 0.0402  | 0.0334  | 0.0412  | 0.0360  | 0.0389  | 0.0273  | 0.0400  | 0.0319  | 0.0362  | 0.0335  |
|           | p         | 0.0000  | 0.0004  | 0.0000  | 0.0001  | 0.0014  | 0.0000  | 0.0002  | 0.0000  | 0.0009  | 0.0000  | 0.0005  | 0.0002  | 0.0004  |
| D10S1435  | Fst       | -0.0033 | -0.0057 | -0.0031 | 0.0155  | -0.0033 | -0.0040 | -0.0046 | -0.0016 | -0.0018 | -0.0028 | 0.0024  | -0.0054 | -0.0057 |
|           | p         | 0.7569  | 0.9363  | 0.7227  | 0.0072  | 0.5989  | 0.8873  | 0.8081  | 0.5645  | 0.4890  | 0.7118  | 0.2497  | 0.9501  | 0.9197  |
| D11S4463  | Fst       | -0.0018 | -0.0006 | -0.0029 | -0.0033 | -0.0056 | -0.0021 | -0.0036 | -0.0023 | 0.0069  | -0.0001 | -0.0034 | -0.0024 | 0.0026  |

|          |     |         |         |         |         |         |         |         |         |         |         |         |         |         |
|----------|-----|---------|---------|---------|---------|---------|---------|---------|---------|---------|---------|---------|---------|---------|
|          | p   | 0.5560  | 0.4289  | 0.6933  | 0.7395  | 0.7962  | 0.6307  | 0.7221  | 0.6486  | 0.1191  | 0.3905  | 0.6954  | 0.6176  | 0.2352  |
| D12ATA63 | Fst | -0.0024 | -0.0050 | -0.0048 | -0.0017 | -0.0043 | -0.0031 | -0.0017 | -0.0018 | 0.0375  | -0.0029 | 0.0007  | -0.0046 | 0.0056  |
|          | p   | 0.6228  | 0.8467  | 0.9082  | 0.5406  | 0.6736  | 0.7249  | 0.4994  | 0.5780  | 0.0004  | 0.6983  | 0.3322  | 0.8584  | 0.1374  |
| D14S1434 | Fst | -0.0002 | -0.0042 | 0.0045  | -0.0015 | 0.0072  | 0.0000  | -0.0007 | 0.0009  | -0.0022 | -0.0005 | 0.0024  | -0.0008 | -0.0059 |
|          | p   | 0.3877  | 0.7393  | 0.1476  | 0.5022  | 0.1425  | 0.3862  | 0.4204  | 0.3074  | 0.5266  | 0.4212  | 0.2531  | 0.4329  | 0.9269  |
| D17S1301 | Fst | 0.0014  | 0.0027  | -0.0004 | -0.0014 | -0.0028 | 0.0014  | -0.0027 | 0.0004  | 0.0127  | -0.0008 | -0.0016 | 0.0006  | 0.0100  |
|          | p   | 0.2752  | 0.2346  | 0.4068  | 0.4959  | 0.5503  | 0.2707  | 0.6103  | 0.3446  | 0.0523  | 0.4452  | 0.5206  | 0.3330  | 0.0676  |
| D18S853  | Fst | -0.0047 | -0.0034 | -0.0037 | -0.0022 | -0.0079 | -0.0021 | -0.0030 | -0.0029 | -0.0017 | -0.0029 | 0.0065  | -0.0033 | -0.0009 |
|          | p   | 0.9046  | 0.6593  | 0.7633  | 0.5828  | 0.9491  | 0.5955  | 0.6128  | 0.7008  | 0.4909  | 0.7066  | 0.1215  | 0.6989  | 0.4378  |
| D19S433  | Fst | -0.0023 | -0.0009 | -0.0022 | -0.0026 | -0.0071 | -0.0010 | -0.0021 | -0.0020 | 0.0095  | -0.0033 | -0.0023 | -0.0036 | -0.0009 |
|          | p   | 0.6870  | 0.4874  | 0.6538  | 0.7276  | 0.9658  | 0.5143  | 0.5982  | 0.6580  | 0.0477  | 0.8515  | 0.6316  | 0.8193  | 0.4954  |
| D20S482  | Fst | 0.0008  | 0.0002  | 0.0035  | 0.0038  | 0.0004  | -0.0006 | 0.0136  | 0.0010  | 0.0126  | -0.0007 | -0.0013 | 0.0103  | -0.0053 |
|          | p   | 0.3237  | 0.3741  | 0.1894  | 0.1798  | 0.3562  | 0.4410  | 0.0342  | 0.3060  | 0.0499  | 0.4415  | 0.4769  | 0.0479  | 0.8704  |
| D22S1045 | Fst | 0.0177  | 0.0149  | 0.0067  | 0.2997  | 0.0822  | 0.0085  | 0.0004  | 0.0074  | 0.0021  | 0.0043  | 0.0050  | 0.0143  | -0.0039 |
|          | p   | 0.0070  | 0.0192  | 0.0908  | 0.0000  | 0.0000  | 0.0513  | 0.3615  | 0.0641  | 0.2656  | 0.1480  | 0.1709  | 0.0183  | 0.7187  |

LST: Lhasa-Tibetan; QHS: Qinghai-Salar; HBTJ: Hubei-Tujia; YNB: Yunnan-Bai; NXH: Ningxia-Han; AU: Kuqa-Uyghur; ILK: Ili-Kazakh; FJS: Fujian-She; IMM: Inner-Mongolia-Mongolian; NH: Northern-Han; GNH: Guanzhong-Han; YNY: Yunnan-Yi; HNL: Hainan-Li; GGH: Guangdong-Han; HNH: Hunan-Han; HDH: Huadong-Han; BJH: Beijing-Han; ZJH: Zhejiang-Han; IMR: Inner-Mongolia-Russian; SDH: Shandong-Han; LNH: Liaoning-Han; HNH-2: Henan-Han-2; GSYG: Gansu-Yugu; XJXO: Xinjiang-Xibe; HNH-1: Henan-Han-1; SCH: Sichuan-Han; SCT: Sichuan Tibetan



**Supplementary Table S9.** The pairwise Nei's genetic distance among 28 Chinese populations

| Populations | [01]   | [02]   | [03]   | [04]   | [05]   | [06]   | [07]   | [08]   | [09]   | [10]   | [11]   | [12]   | [13]   | [14]   | [15]   | [16]   | [17]   | [18]   | [19]   | [20]   | [21]   | [22]   | [23]   | [24]   | [25]   | [26]   | [27]   | [28] |  |
|-------------|--------|--------|--------|--------|--------|--------|--------|--------|--------|--------|--------|--------|--------|--------|--------|--------|--------|--------|--------|--------|--------|--------|--------|--------|--------|--------|--------|------|--|
| [01] SCY    |        |        |        |        |        |        |        |        |        |        |        |        |        |        |        |        |        |        |        |        |        |        |        |        |        |        |        |      |  |
| [02] SCT    | 0.0282 |        |        |        |        |        |        |        |        |        |        |        |        |        |        |        |        |        |        |        |        |        |        |        |        |        |        |      |  |
| [03] XJXB   | 0.0280 | 0.0276 |        |        |        |        |        |        |        |        |        |        |        |        |        |        |        |        |        |        |        |        |        |        |        |        |        |      |  |
| [04] HNH-1  | 0.0450 | 0.0433 | 0.0343 |        |        |        |        |        |        |        |        |        |        |        |        |        |        |        |        |        |        |        |        |        |        |        |        |      |  |
| [05] SCH    | 0.0221 | 0.0253 | 0.0143 | 0.0290 |        |        |        |        |        |        |        |        |        |        |        |        |        |        |        |        |        |        |        |        |        |        |        |      |  |
| [06] LST    | 0.0299 | 0.0209 | 0.0309 | 0.0478 | 0.0260 |        |        |        |        |        |        |        |        |        |        |        |        |        |        |        |        |        |        |        |        |        |        |      |  |
| [07] QHS    | 0.0347 | 0.0331 | 0.0286 | 0.0454 | 0.0228 | 0.0355 |        |        |        |        |        |        |        |        |        |        |        |        |        |        |        |        |        |        |        |        |        |      |  |
| [08] HBTJ   | 0.0281 | 0.0285 | 0.0236 | 0.0375 | 0.0094 | 0.0264 | 0.0340 |        |        |        |        |        |        |        |        |        |        |        |        |        |        |        |        |        |        |        |        |      |  |
| [09] YNB    | 0.0280 | 0.0274 | 0.0185 | 0.0385 | 0.0121 | 0.0268 | 0.0307 | 0.0159 |        |        |        |        |        |        |        |        |        |        |        |        |        |        |        |        |        |        |        |      |  |
| [10] NXH    | 0.0242 | 0.0247 | 0.0165 | 0.0295 | 0.0074 | 0.0239 | 0.0277 | 0.0131 | 0.0120 |        |        |        |        |        |        |        |        |        |        |        |        |        |        |        |        |        |        |      |  |
| [11] AU     | 0.0245 | 0.0306 | 0.0193 | 0.0382 | 0.0083 | 0.0283 | 0.0283 | 0.0158 | 0.0167 | 0.0131 |        |        |        |        |        |        |        |        |        |        |        |        |        |        |        |        |        |      |  |
| [12] ILK    | 0.0391 | 0.0306 | 0.0174 | 0.0470 | 0.0274 | 0.0281 | 0.0382 | 0.0273 | 0.0228 | 0.0257 | 0.0214 |        |        |        |        |        |        |        |        |        |        |        |        |        |        |        |        |      |  |
| [13] FJS    | 0.0552 | 0.0577 | 0.0545 | 0.0688 | 0.0423 | 0.0544 | 0.0331 | 0.0469 | 0.0437 | 0.0476 | 0.0523 | 0.0645 |        |        |        |        |        |        |        |        |        |        |        |        |        |        |        |      |  |
| [14] IMM    | 0.0407 | 0.0398 | 0.0233 | 0.0481 | 0.0247 | 0.0406 | 0.0372 | 0.0332 | 0.0310 | 0.0281 | 0.0297 | 0.0372 | 0.0651 |        |        |        |        |        |        |        |        |        |        |        |        |        |        |      |  |
| [15] NH     | 0.0321 | 0.0313 | 0.0184 | 0.0385 | 0.0112 | 0.0340 | 0.0158 | 0.0172 | 0.0178 | 0.0152 | 0.0193 | 0.0313 | 0.0365 | 0.0268 |        |        |        |        |        |        |        |        |        |        |        |        |        |      |  |
| [16] GNH    | 0.0248 | 0.0235 | 0.0118 | 0.0296 | 0.0064 | 0.0224 | 0.0232 | 0.0115 | 0.0120 | 0.0054 | 0.0129 | 0.0232 | 0.0467 | 0.0218 | 0.0114 |        |        |        |        |        |        |        |        |        |        |        |        |      |  |
| [17] YNY    | 0.0494 | 0.0553 | 0.0399 | 0.0657 | 0.0326 | 0.0542 | 0.0310 | 0.0400 | 0.0408 | 0.0384 | 0.0356 | 0.0462 | 0.0400 | 0.0520 | 0.0314 | 0.0389 |        |        |        |        |        |        |        |        |        |        |        |      |  |
| [18] HNL    | 0.0424 | 0.0534 | 0.0439 | 0.0560 | 0.0173 | 0.0533 | 0.0464 | 0.0274 | 0.0336 | 0.0270 | 0.0176 | 0.0582 | 0.0582 | 0.0486 | 0.0336 | 0.0279 | 0.0500 |        |        |        |        |        |        |        |        |        |        |      |  |
| [19] GGH    | 0.0267 | 0.0356 | 0.0225 | 0.0392 | 0.0056 | 0.0360 | 0.0312 | 0.0111 | 0.0187 | 0.0123 | 0.0092 | 0.0374 | 0.0465 | 0.0332 | 0.0184 | 0.0131 | 0.0348 | 0.0120 |        |        |        |        |        |        |        |        |        |      |  |
| [20] HNH    | 0.0246 | 0.0287 | 0.0174 | 0.0321 | 0.0034 | 0.0305 | 0.0252 | 0.0091 | 0.0148 | 0.0097 | 0.0098 | 0.0314 | 0.0410 | 0.0275 | 0.0123 | 0.0077 | 0.0338 | 0.0152 | 0.0041 |        |        |        |        |        |        |        |        |      |  |
| [21] HDH    | 0.0264 | 0.0290 | 0.0159 | 0.0334 | 0.0059 | 0.0294 | 0.0218 | 0.0119 | 0.0135 | 0.0085 | 0.0131 | 0.0303 | 0.0370 | 0.0253 | 0.0096 | 0.0082 | 0.0273 | 0.0231 | 0.0080 | 0.0053 |        |        |        |        |        |        |        |      |  |
| [22] BJH    | 0.0233 | 0.0241 | 0.0123 | 0.0279 | 0.0044 | 0.0233 | 0.0226 | 0.0104 | 0.0110 | 0.0067 | 0.0119 | 0.0249 | 0.0443 | 0.0235 | 0.0093 | 0.0047 | 0.0354 | 0.0237 | 0.0108 | 0.0053 | 0.0056 |        |        |        |        |        |        |      |  |
| [23] ZJH    | 0.0241 | 0.0249 | 0.0156 | 0.0299 | 0.0065 | 0.0299 | 0.0255 | 0.0120 | 0.0158 | 0.0106 | 0.0135 | 0.0272 | 0.0448 | 0.0261 | 0.0131 | 0.0081 | 0.0346 | 0.0252 | 0.0112 | 0.0079 | 0.0092 | 0.0061 |        |        |        |        |        |      |  |
| [24] IMR    | 0.0395 | 0.0434 | 0.0279 | 0.0482 | 0.0237 | 0.0478 | 0.0185 | 0.0374 | 0.0304 | 0.0251 | 0.0290 | 0.0449 | 0.0409 | 0.0388 | 0.0133 | 0.0239 | 0.0282 | 0.0462 | 0.0318 | 0.0262 | 0.0184 | 0.0215 | 0.0272 |        |        |        |        |      |  |
| [25] SDH    | 0.0216 | 0.0208 | 0.0108 | 0.0274 | 0.0041 | 0.0229 | 0.0223 | 0.0085 | 0.0108 | 0.0056 | 0.0115 | 0.0231 | 0.0417 | 0.0221 | 0.0095 | 0.0035 | 0.0360 | 0.0250 | 0.0094 | 0.0044 | 0.0046 | 0.0018 | 0.0052 | 0.0234 |        |        |        |      |  |
| [26] LNH    | 0.0233 | 0.0219 | 0.0118 | 0.0296 | 0.0064 | 0.0239 | 0.0237 | 0.0134 | 0.0113 | 0.0077 | 0.0148 | 0.0234 | 0.0441 | 0.0254 | 0.0124 | 0.0064 | 0.0393 | 0.0284 | 0.0134 | 0.0095 | 0.0095 | 0.0049 | 0.0092 | 0.0266 | 0.0046 |        |        |      |  |
| [27] HNH-2  | 0.0221 | 0.0215 | 0.0102 | 0.0272 | 0.0042 | 0.0226 | 0.0227 | 0.0096 | 0.0116 | 0.0052 | 0.0113 | 0.0222 | 0.0427 | 0.0228 | 0.0091 | 0.0036 | 0.0342 | 0.0252 | 0.0098 | 0.0043 | 0.0048 | 0.0018 | 0.0063 | 0.0219 | 0.0013 | 0.0044 |        |      |  |
| [28] GSYG   | 0.0454 | 0.0381 | 0.0333 | 0.0469 | 0.0320 | 0.0322 | 0.0427 | 0.0334 | 0.0353 | 0.0268 | 0.0361 | 0.0352 | 0.0661 | 0.0472 | 0.0399 | 0.0278 | 0.0630 | 0.0569 | 0.0355 | 0.0347 | 0.0293 | 0.0299 | 0.0342 | 0.0503 | 0.0265 | 0.0311 | 0.0272 |      |  |

LST: Lhasa-Tibetan; QHS: Qinghai-Salar; HBTJ: Hubei-Tujia; YNB: Yunnan-Bai; NXH: Ningxia-Han; AU: Kuqa-Uyghur; ILK: Ili-Kazakh; FJS: Fujian-She; IMM: Inner-Mongolia-Mongolian;

NH: Northern-Han; GNH: Guanzhong-Han; YNY: Yunnan-Yi; HNL: Hainan-Li; GGH: Guangdong-Han; HNH: Hunan-Han; HDH: Huadong-Han; BJH: Beijing-Han; ZJH: Zhejiang-Han; IMR: Inner-Mongolia-Russian; SDH: Shandong-Han; LNH: Liaoning-Han; HNH-2: Henan-Han-2; GSYG: Gansu-Yugu; XJXO: Xinjiang-Xibe; HNH-1: Henan-Han-1; SCH: Sichuan-Han; SCT: Sichuan Tibetan; SCY: SiChuan Yi
